# Supplementary material
Source: PubMed Central journal article supplement (PMC3304449)
Supplement: NIHMS355270-supplement-SuppInfo_1.pdf [file NIHMS355270-supplement-SuppInfo_1.pdf]

**Conformationally Constrained 5-Fluoro- and 5-Hydroxymethanopyrrolidines. Ring Puckered Mimics of *Gauche* and *anti*-3-Fluoro- and 3-Hydroxypyrrolidines.**

**Supplemental Section**

**Page**

|              |                                                                                          |
|--------------|------------------------------------------------------------------------------------------|
| S-2 to S-26  | Spectra for <i>N</i> -Boc and <i>N</i> -Ac compounds <b>7, 10a-b, 11a-b, 12b, 13a-b.</b> |
| S-27 to S-34 | Spectra for fluoride precursors <b>19-23.</b>                                            |
| S-35 to S-49 | Spectra for <i>syn</i> -alcohol precursors <b>25-31.</b>                                 |
| S-50 to S-55 | Spectra for <i>anti</i> -alcohol precursors <b>33-35.</b>                                |
| S-56 to S-60 | Spectra for benzoate <b>36</b> and acetate <b>37.</b>                                    |

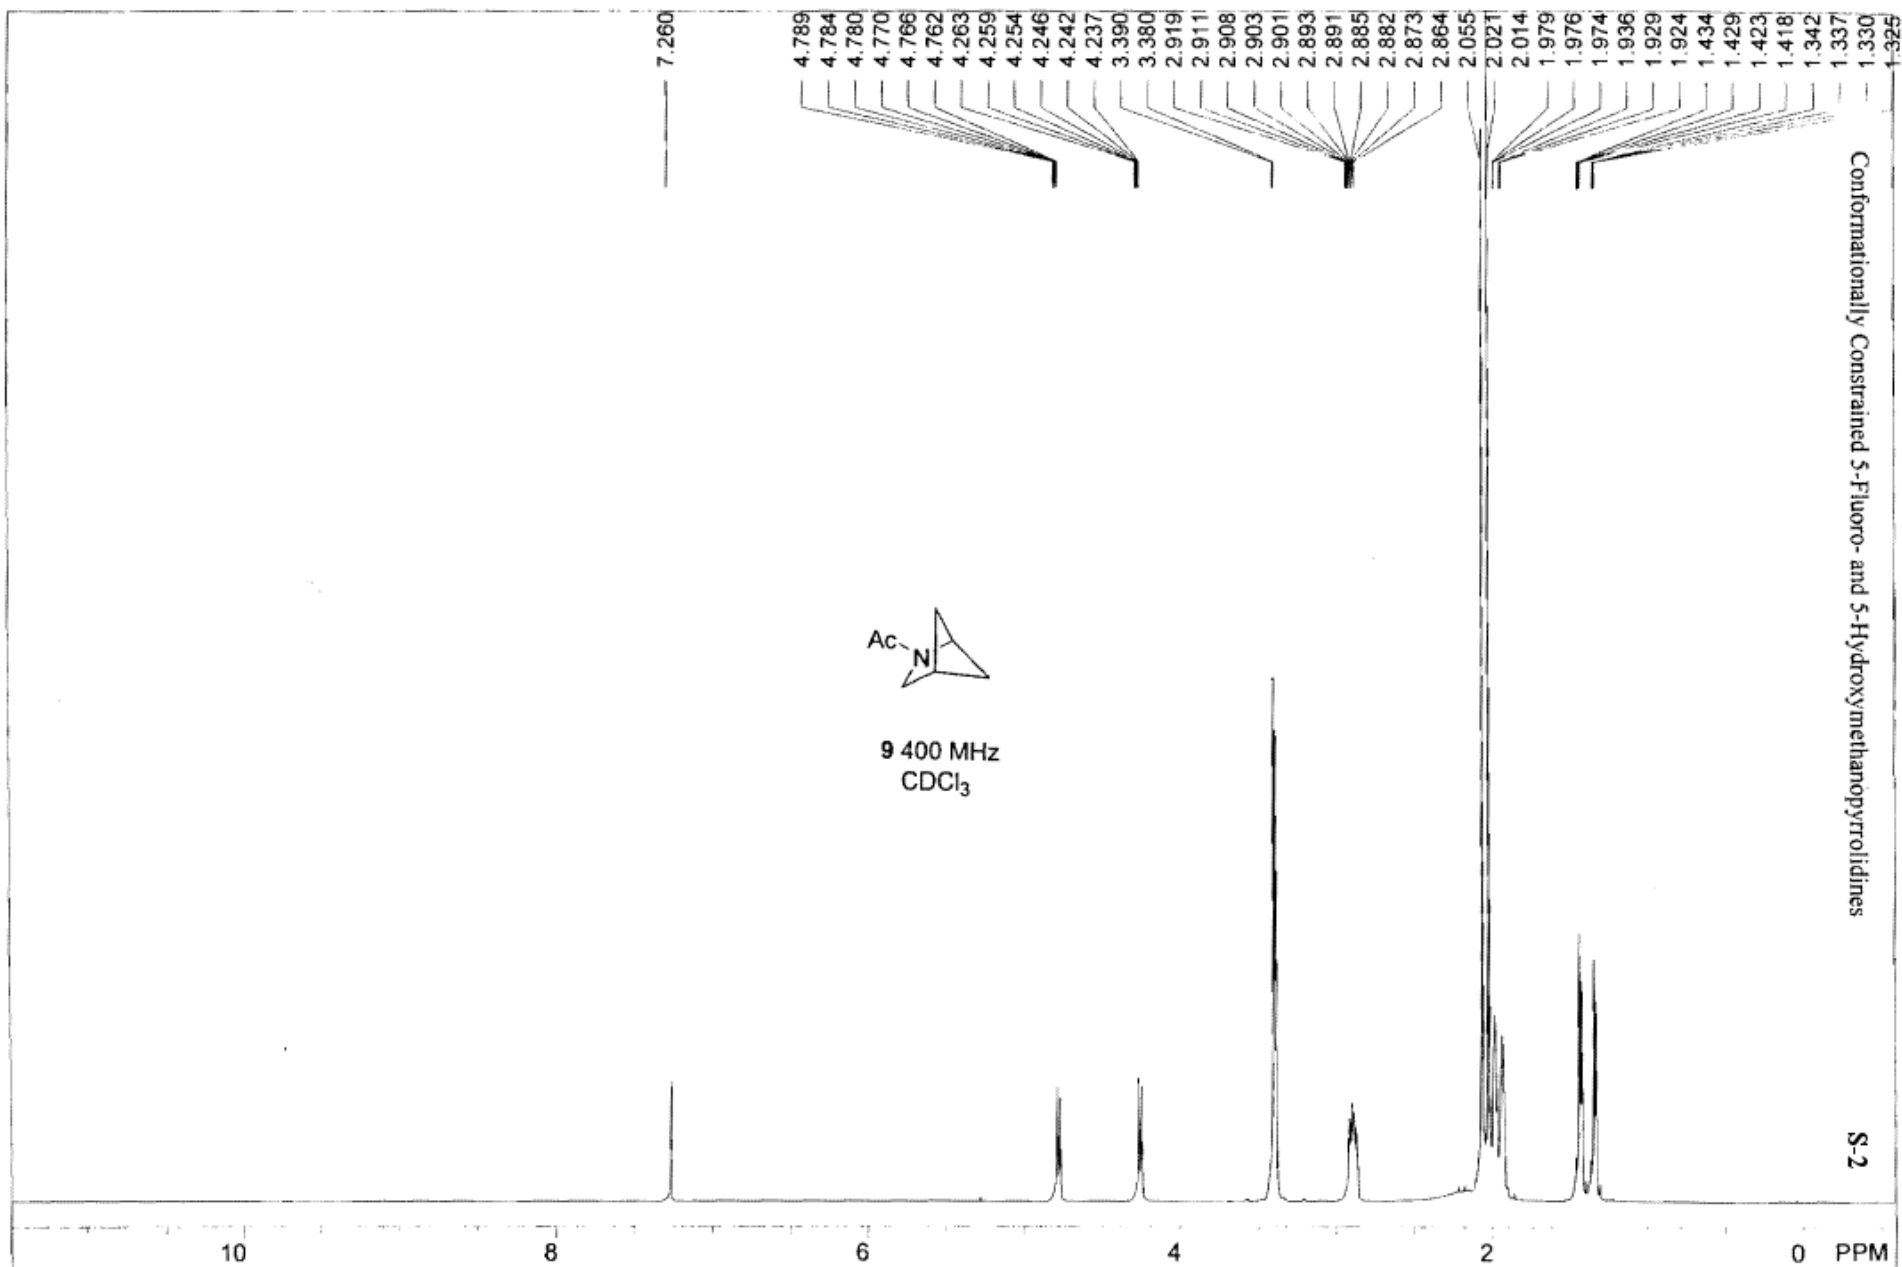

NAC[2.1.1], proton.atm.

USER: temple -- DATE: Sep 7 20:37:38 2007 EDT (UT-4h) temp.

|             |              |             |             |              |
|-------------|--------------|-------------|-------------|--------------|
| F1: 400.191 | F2: 1.000    | SW1: 8278   | OF1: 2003.3 | PTS1d: 32768 |
| EX:         | PW: 9.8 usec | PD: 1.0 sec | NA: 16      | LB: 0.1      |

WinNuts - NAC[2.1.1]--(692) H1--CDCl3

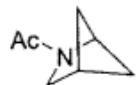

9 400 MHz  
D<sub>2</sub>O

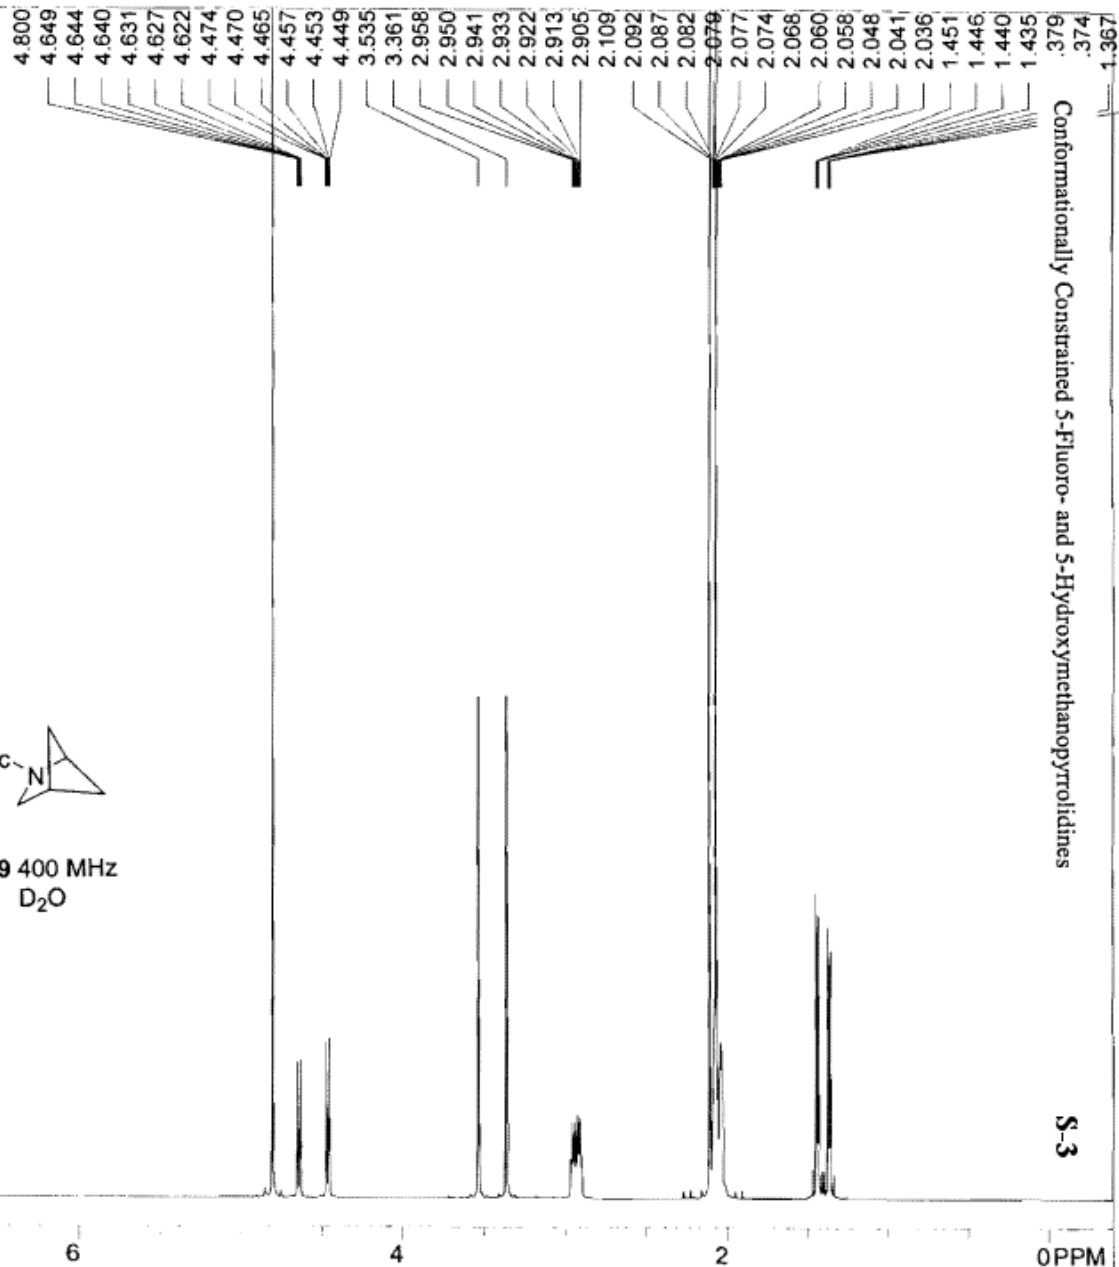

|                                     |           |                                                              |             |              |         |
|-------------------------------------|-----------|--------------------------------------------------------------|-------------|--------------|---------|
| NAC[2.1.1].proton.atm               |           | USER: temple -- DATE: Sep 11 12:29:02 2007 EDT (UT-4h) templ |             |              |         |
| F1: 400.191                         | F2: 1.000 | SW1: 8278                                                    | OF1: 2038.3 | PTS1d: 32768 |         |
| EX:                                 |           | PW: 9.8 usec                                                 | PD: 1.0 sec | NA: 16       | LB: 0.1 |
| WinNuts - NAC[2.1.1]-(700) H1 {D2O} |           |                                                              |             |              |         |

Conformationally Constrained 5-Fluoro- and 5-Hydroxymethanopyrrolidines

S-4

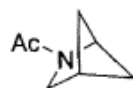

9 100 MHz  
CDCl<sub>3</sub>

168.960  
168.428

77.717  
77.597  
77.395  
77.083

62.875  
59.498

50.472  
48.642

41.487  
40.579  
39.047  
38.301

21.988  
21.872  
21.248

200

150

100

50

0 PPM

NAC[2.1.1].carbonOVNTE.atm.

USER: temple -- DATE: Sep 8 06:10:28 2007 EDT (UT-4h) templ

F1: 100.628

F2: 1.000

SW1: 23148

OF1: 10621.8

PTS1d: 32768

EX:

PW: 5.7 usec

PD: 2.0 sec

NA: 10000

LB: 3.0

WinNuts - NAC[2.1.1]-(693)C

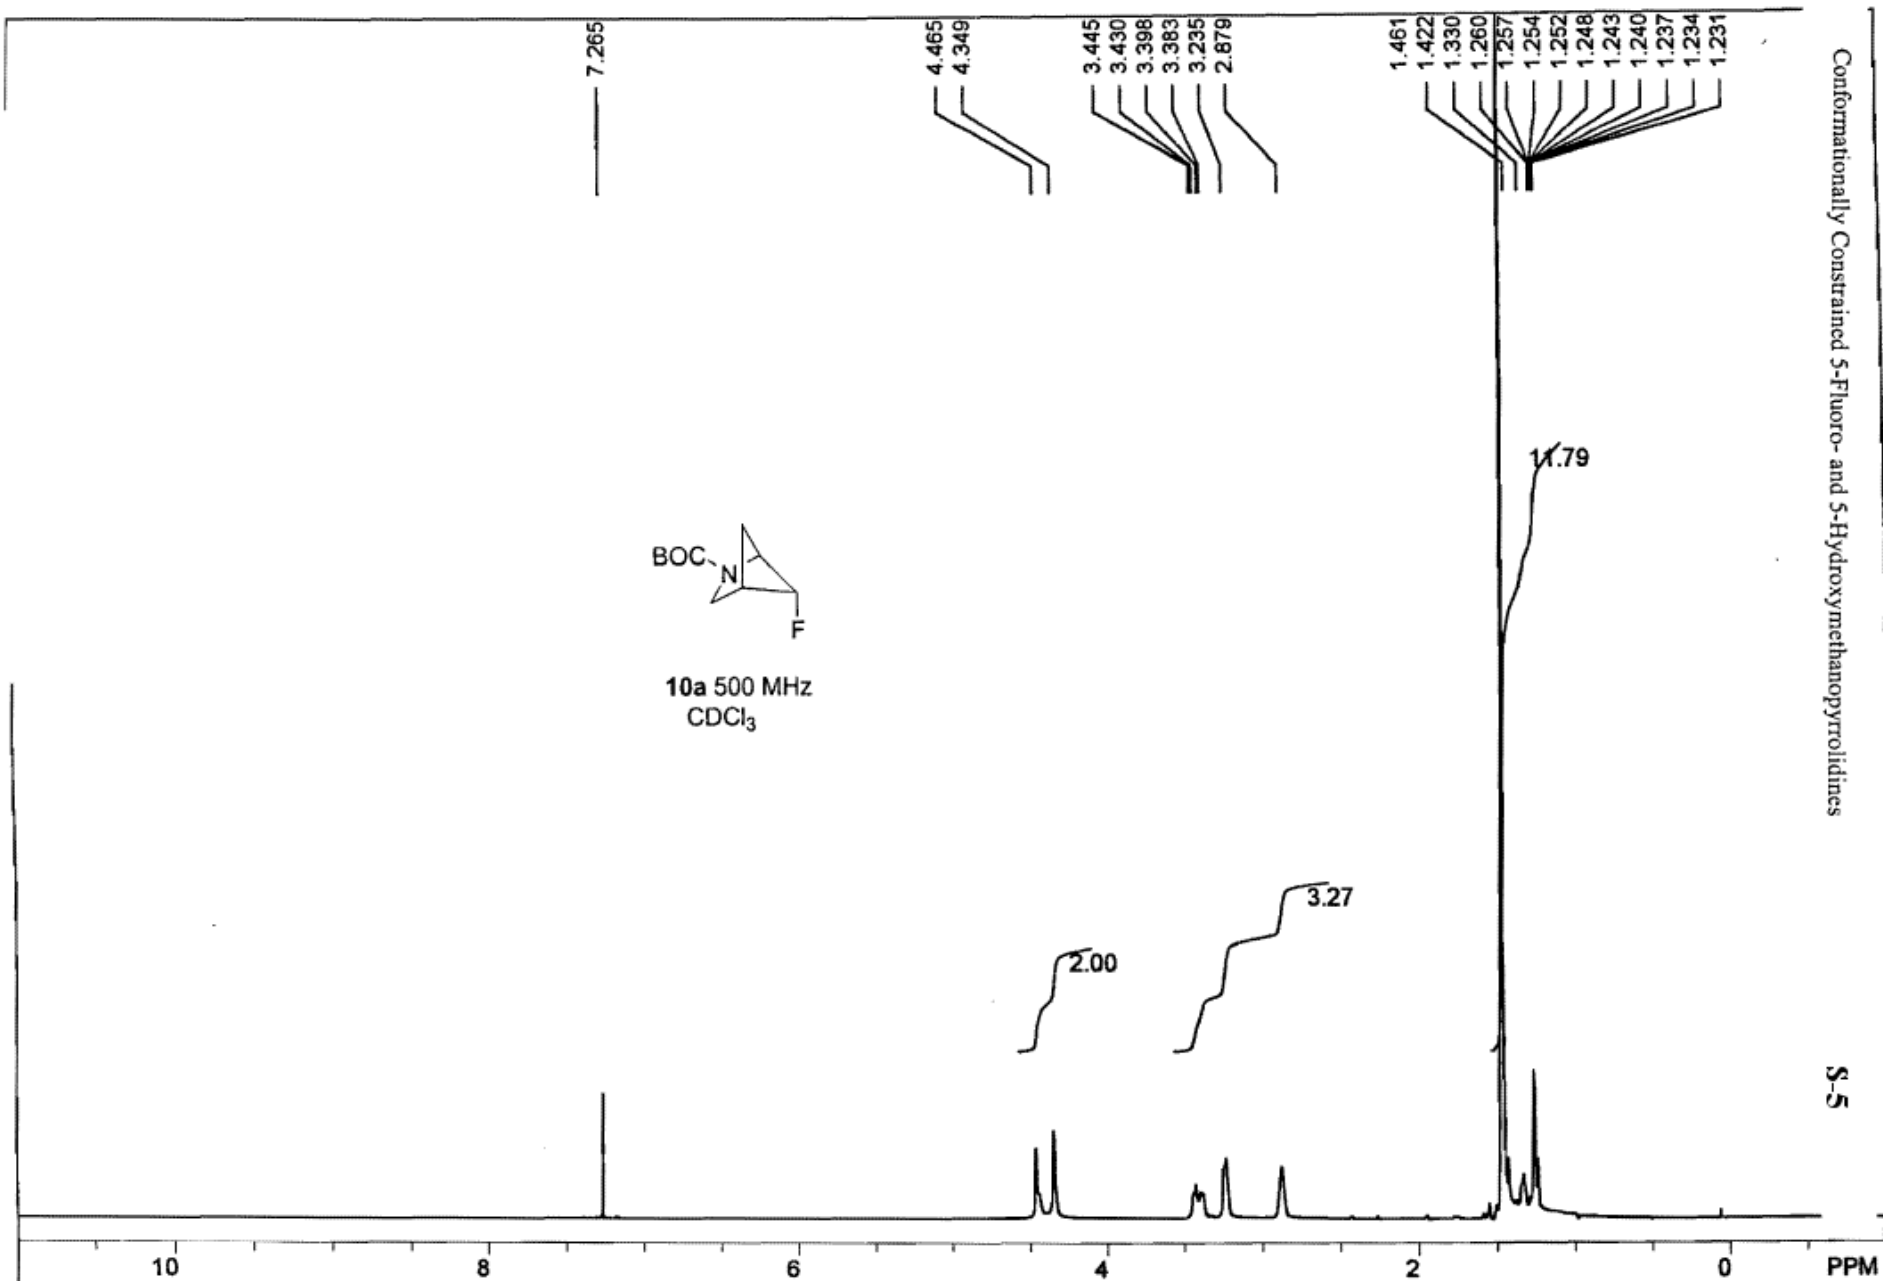

|             |  |              |  |             |  |             |  |              |  |                                   |  |
|-------------|--|--------------|--|-------------|--|-------------|--|--------------|--|-----------------------------------|--|
| F1: 500.130 |  | F2: 500.130  |  | SW1: 6006   |  | OF1: 2500.6 |  | PTS1d: 16384 |  | USER: -- DATE: Fri Feb 9 13:11:40 |  |
| EX: 1puls   |  | PW: 8.0 usec |  | PD: 1.0 sec |  | NA: 8       |  | LB: 0.0      |  | WinNuts - \$expFang29051          |  |

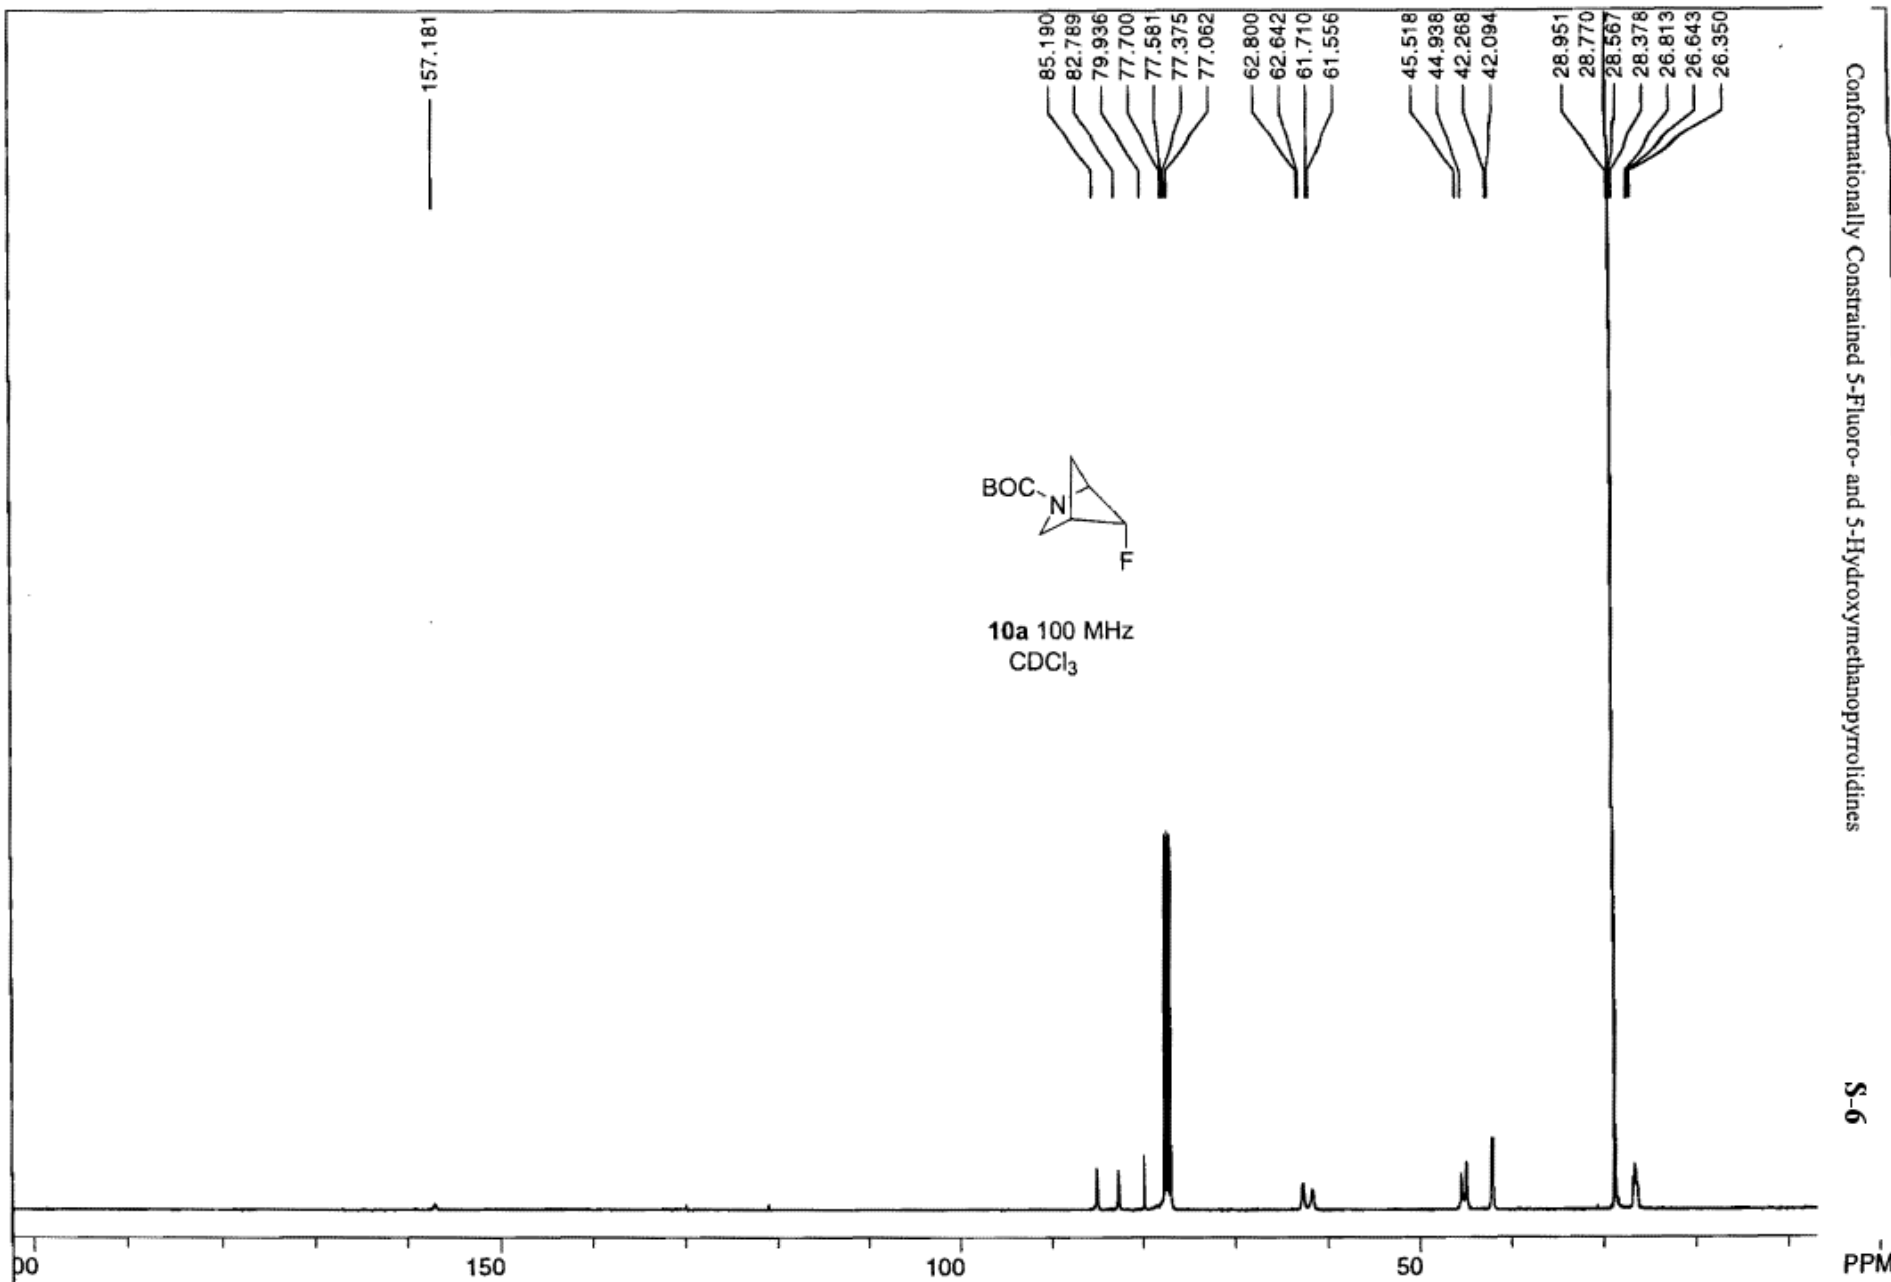

|                             |           |                                                              |             |              |         |              |                      |
|-----------------------------|-----------|--------------------------------------------------------------|-------------|--------------|---------|--------------|----------------------|
| Boc-F syn. carbonOVNTE.atm. |           | USER: temple -- DATE: Feb 12 04:08:37 2005 EST (UT-5h) templ |             |              |         |              |                      |
| F1: 100.585                 | F2: 1.000 | SW1: 25126                                                   |             | OF1: 10057.2 |         | PTS1d: 32768 |                      |
| EX:                         |           | PW: 5.7 usec                                                 | PD: 2.0 sec | NA: 12000    | LB: 2.0 |              | WinNuts - \$WS FTP.1 |

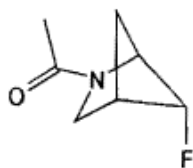**10 b** $^1\text{H NMR}$  (500 MHz,  $\text{CDCl}_3$ )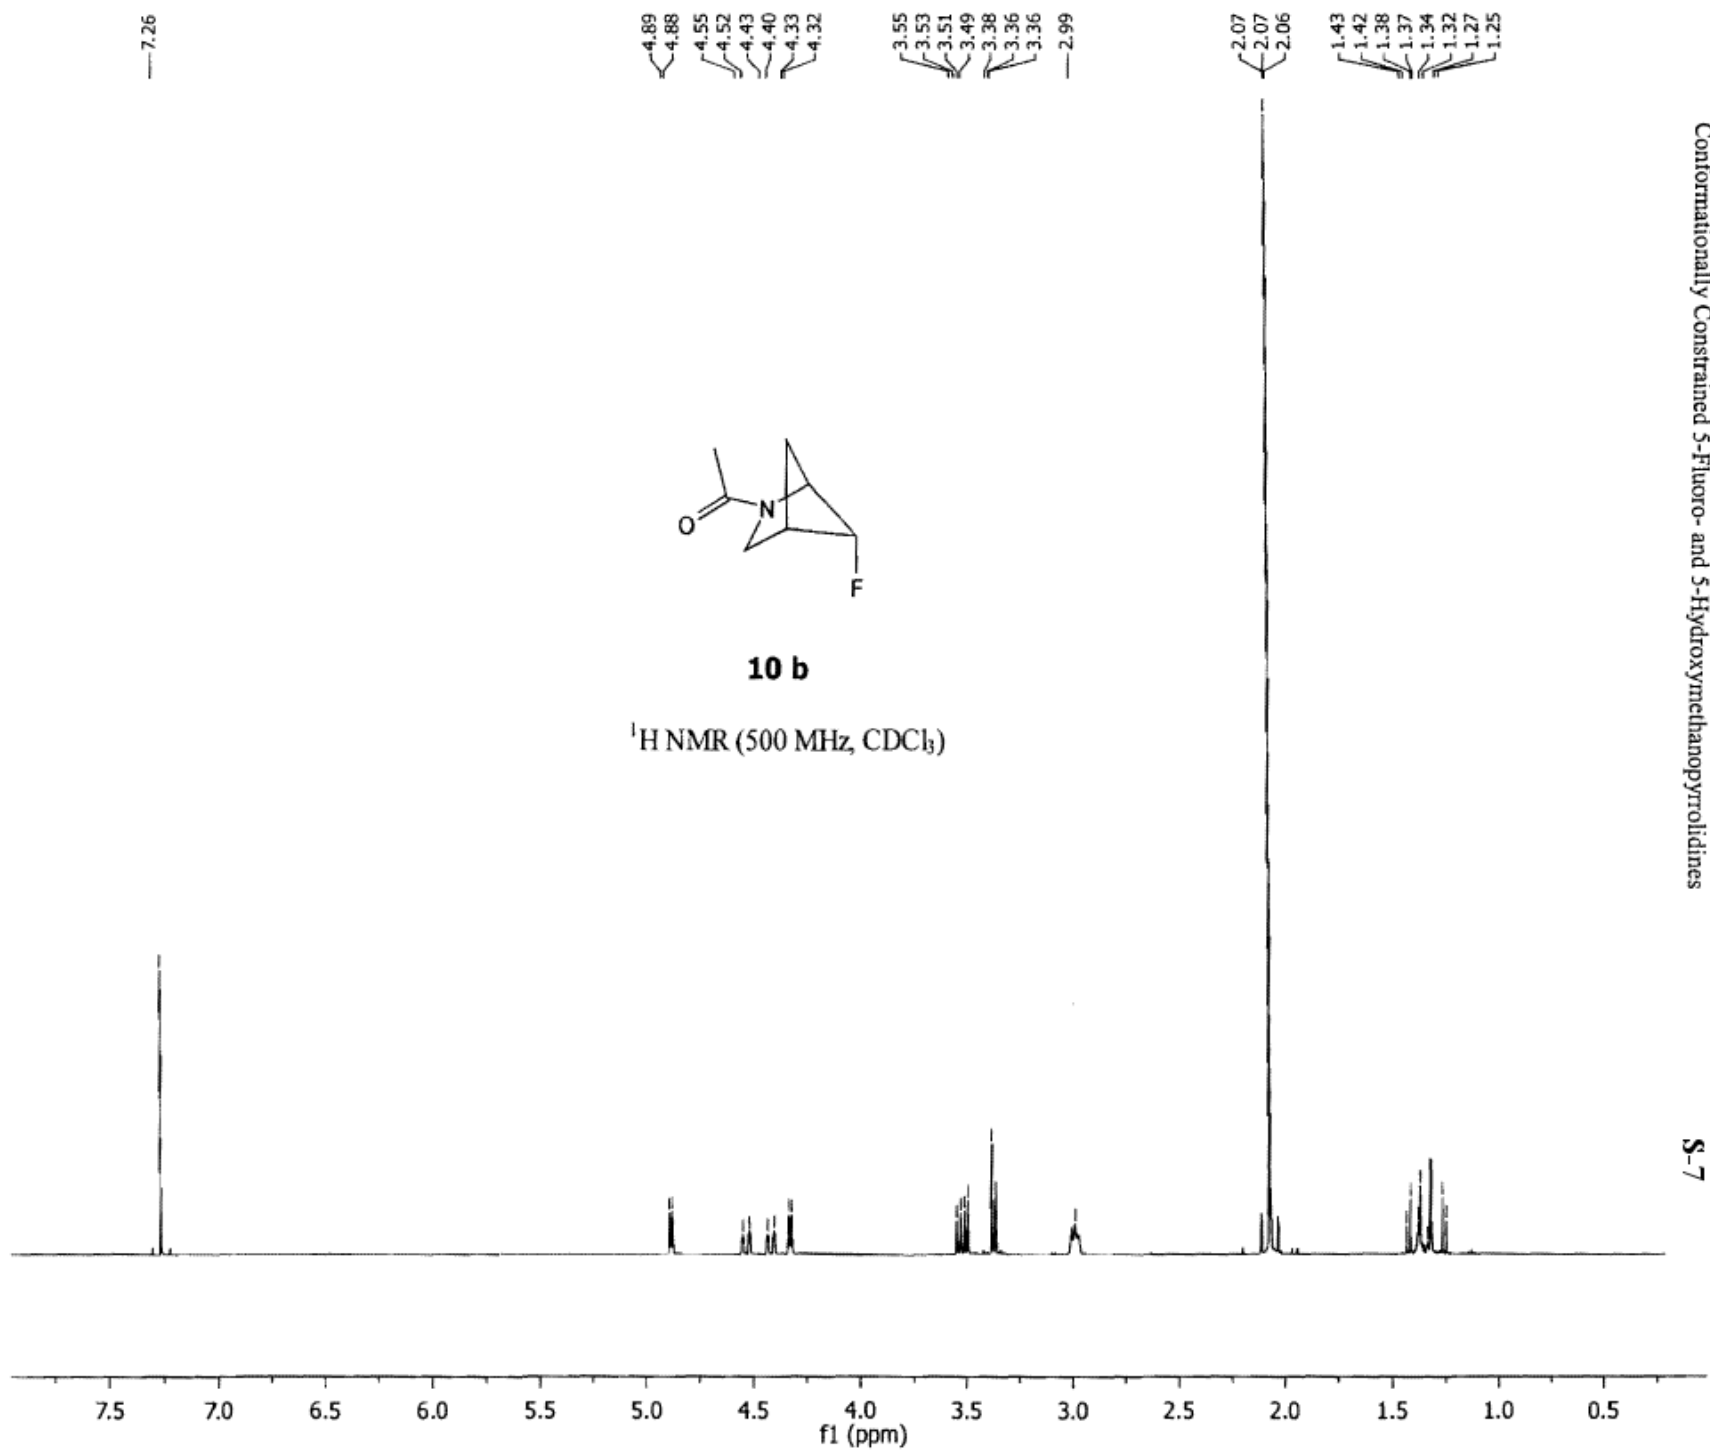

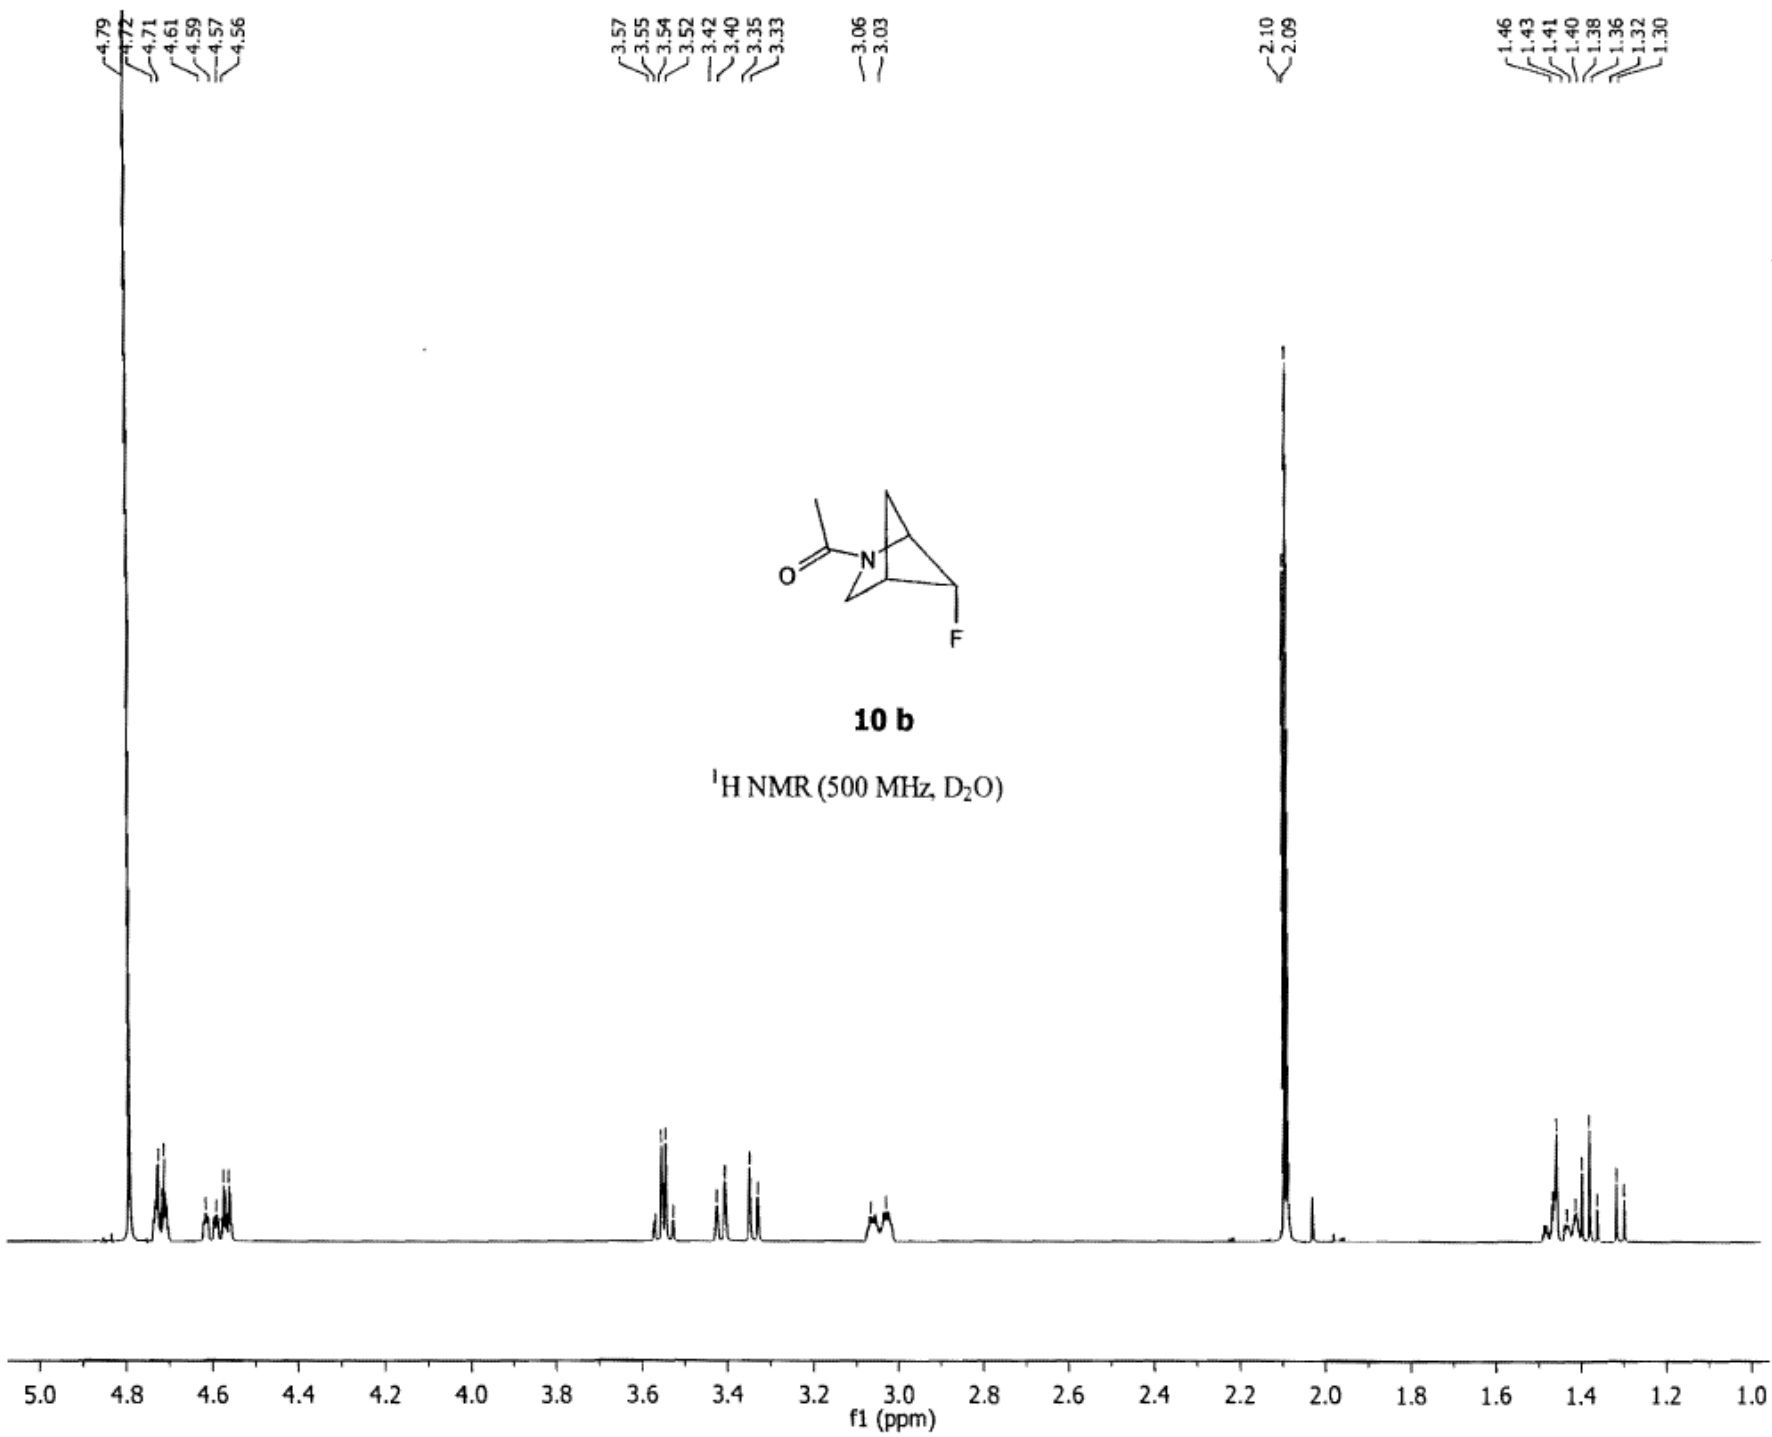



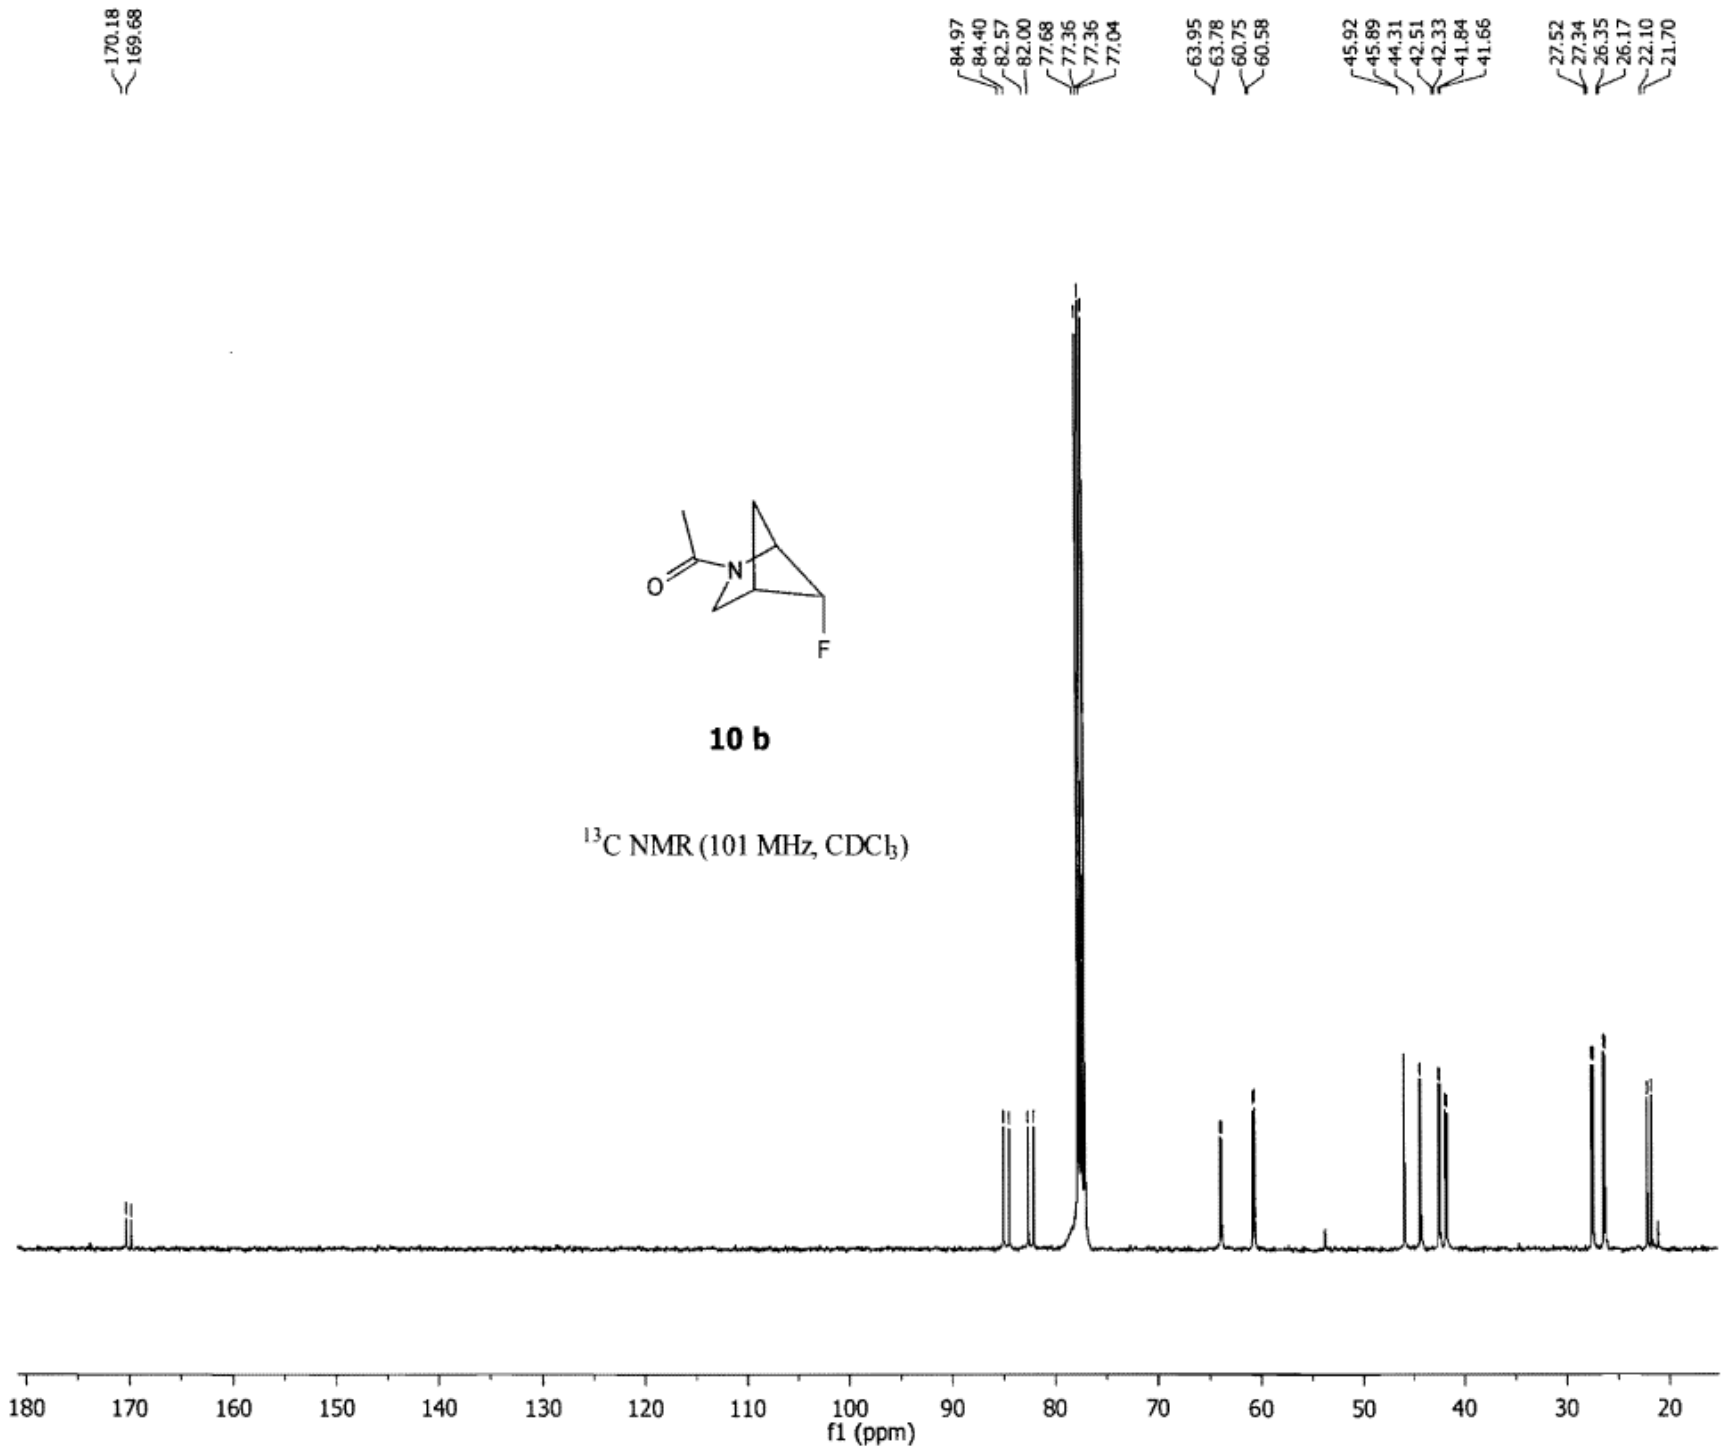

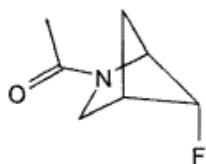**10 b**

$^{19}\text{F}$  NMR Proton Decoupled  
(376 MHz,  $\text{CDCl}_3$ )  
Referenced to  $\text{FCCl}_3 = 0.0$

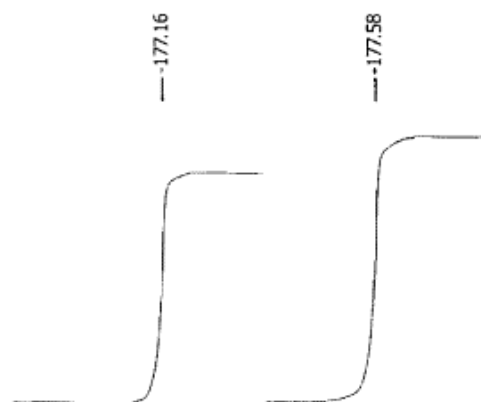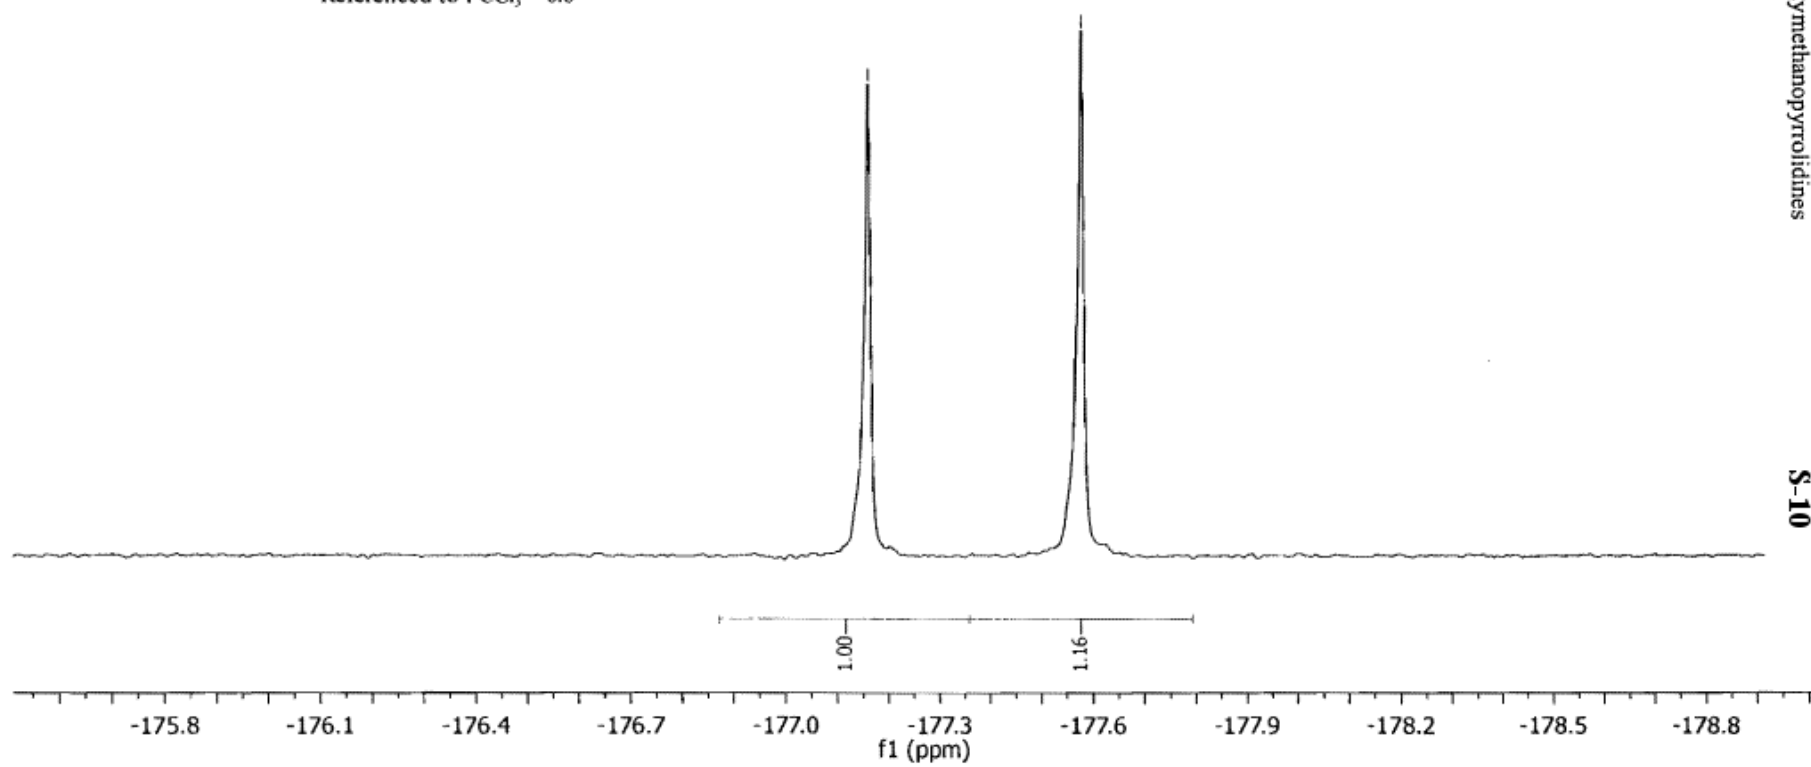

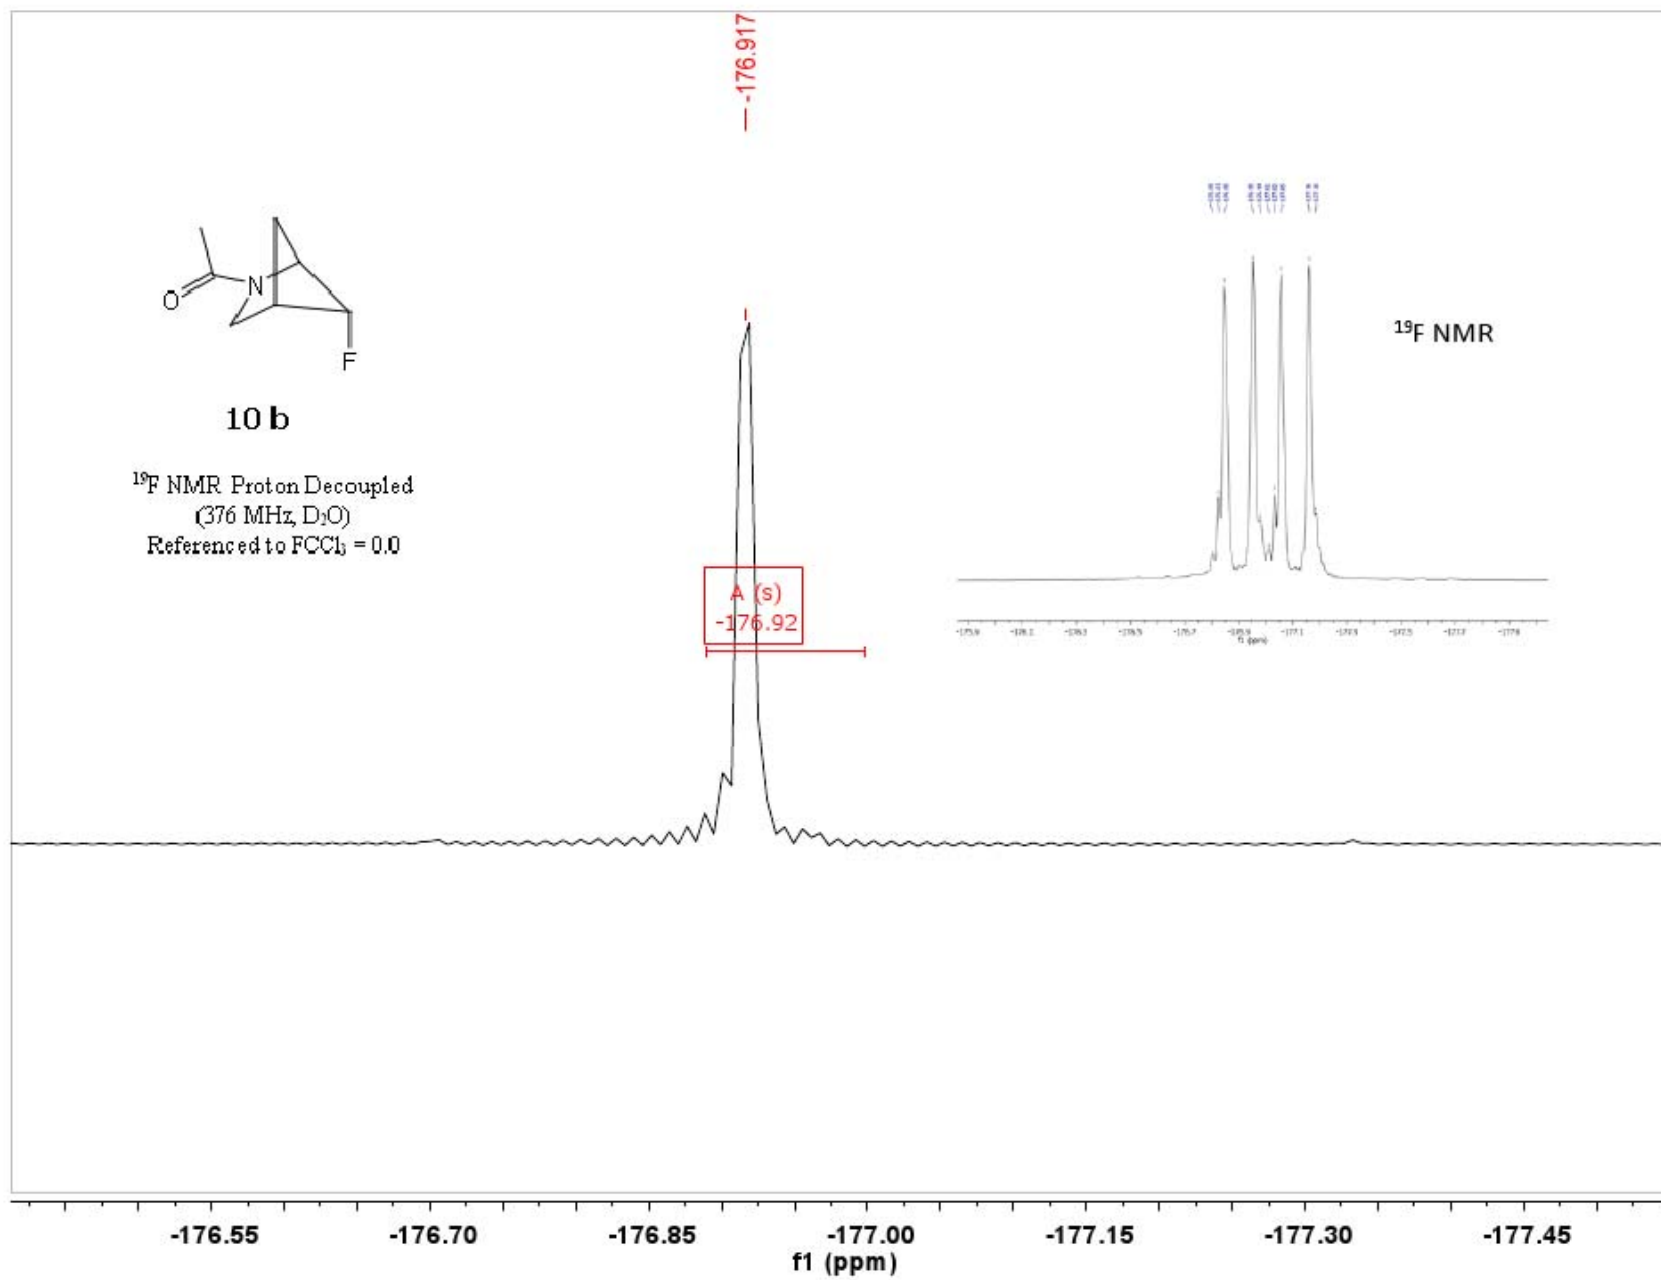

deepa/350\_15Apr2004

exp1 s2pu1

| SAMPLE      |             | SPECIAL    |          |
|-------------|-------------|------------|----------|
| date        | Apr 16 2004 | temp       | not used |
| solvent     | CDC13       | gain       | not used |
| file        | exp         | spin       | 20       |
| ACQUISITION |             | hst        | 0.008    |
| sw          | 3599.9      | pw90       | 8.800    |
| at          | 2.500       | alpha      | 20.000   |
| np          | 18000       | FLAGS      |          |
| fb          | 2000        | ll         | n        |
| bs          | 16          | in         | n        |
| ss          | 2           | dp         | y        |
| d1          | 1.000       | hs         | nn       |
| nt          | 8           | PROCESSING |          |
| ct          | 8           | lb         | -0.41    |
| TRANSMITTER |             | gf         | 0.240    |
| tn          | H1          | gfs        | not used |
| sfrq        | 299.986     | fn         | not used |
| tof         | -11.6       | DISPLAY    |          |
| tpwr        | 59          | sp         | -300.0   |
| pw          | 4.400       | wp         | 3599.9   |
| DECOUPLER   |             | rfl        | 300.0    |
| dn          | C13         | rfp        | 0        |
| dof         | 0           | rp         | -17.9    |
| dm          | nnn         | lp         | -33.1    |
| dmm         | c           | PLOT       |          |
| dpwr        | 35          | wc         | 250      |
| dmf         | 26316       | sc         | 0        |
|             |             | vs         | 243      |
|             |             | th         | 14       |
|             |             | al         | cdc ph   |

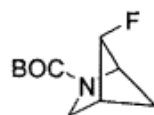

11a 300 MHz  
CDCl<sub>3</sub>

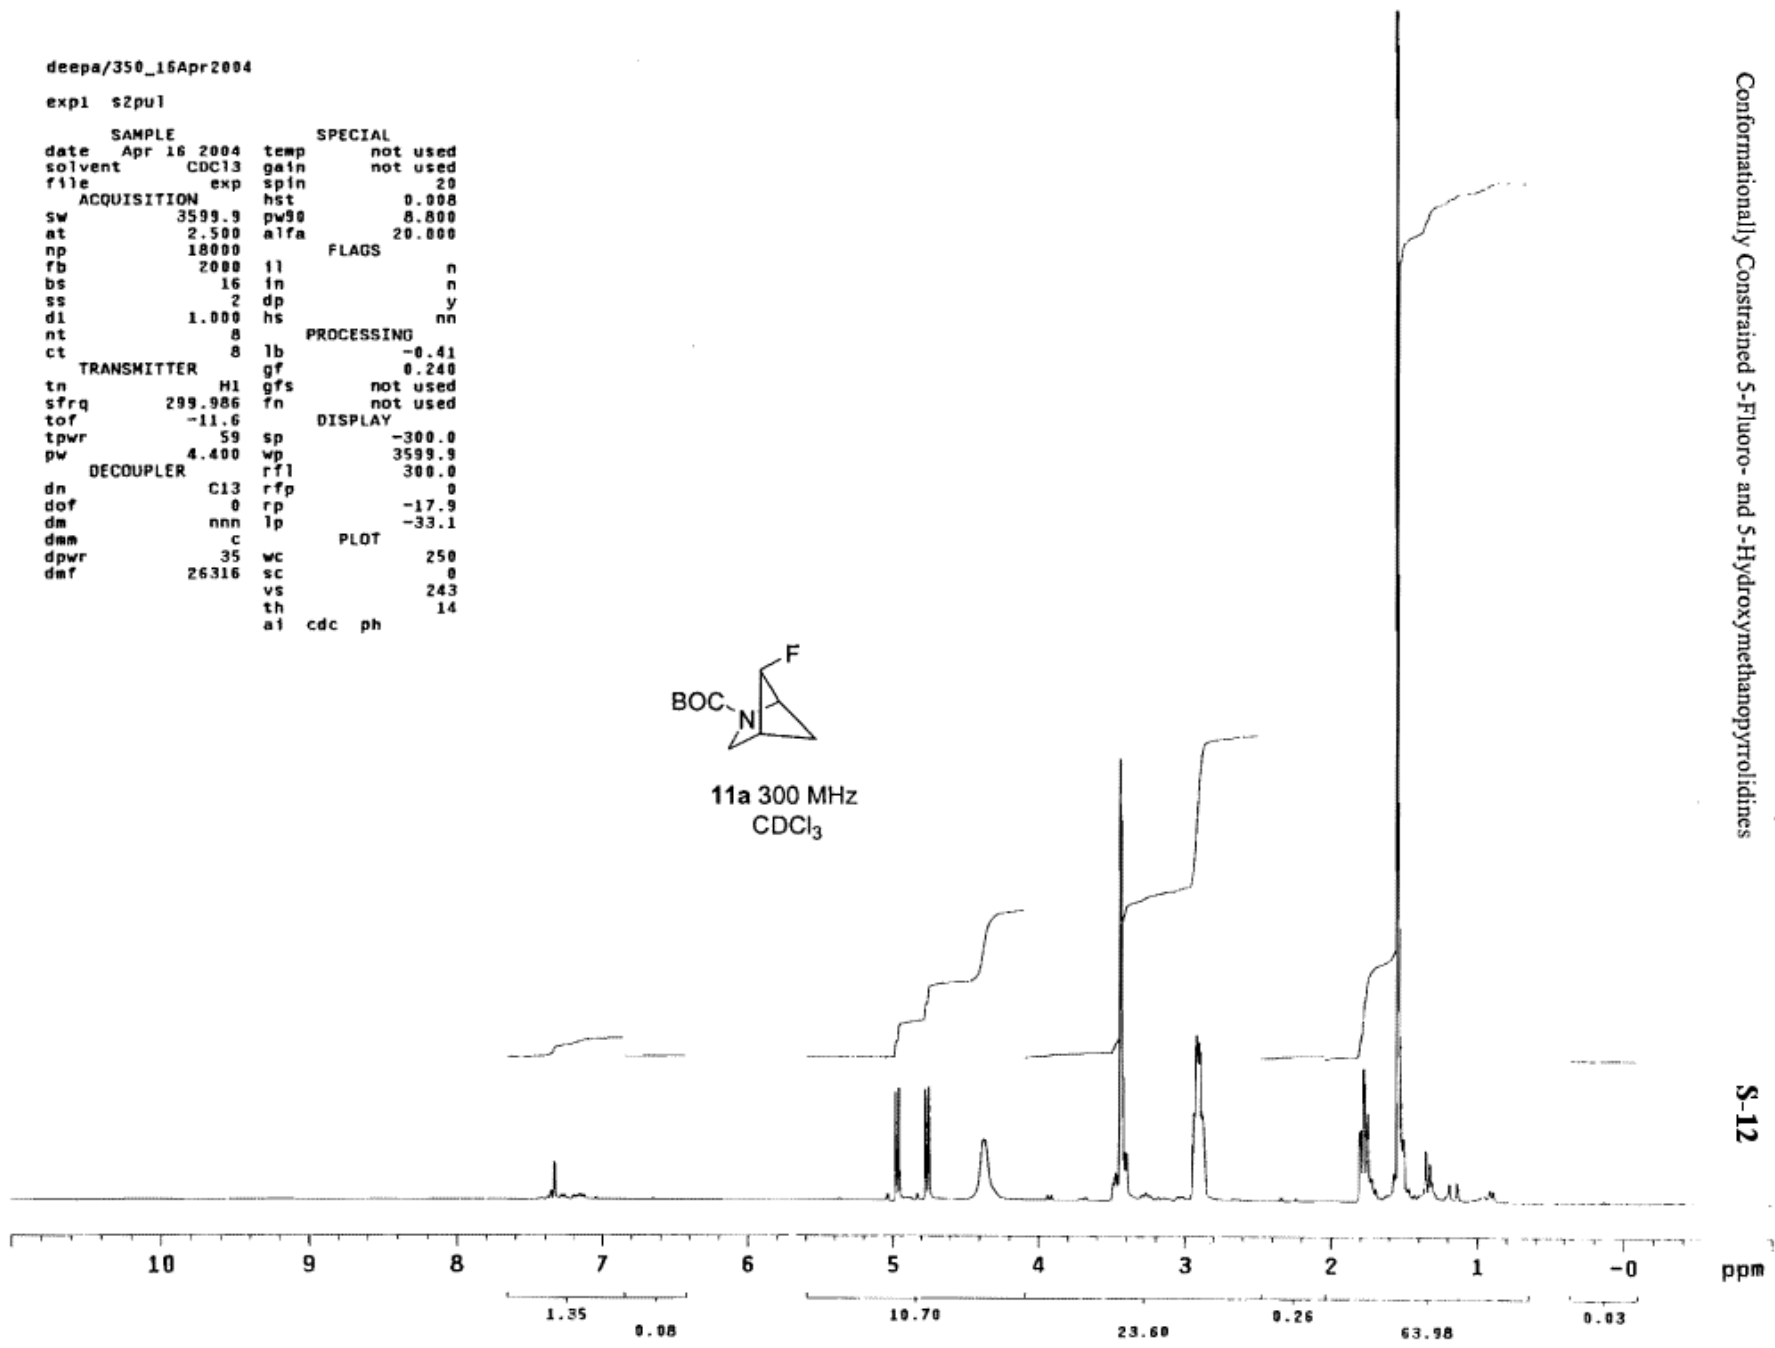

Conformationally Constrained 5-Fluoro- and 5-Hydroxymethanopyrrolidines

S-12

N-Boc-[2.1.1]-5-anti-F  
carbon2HR.atm

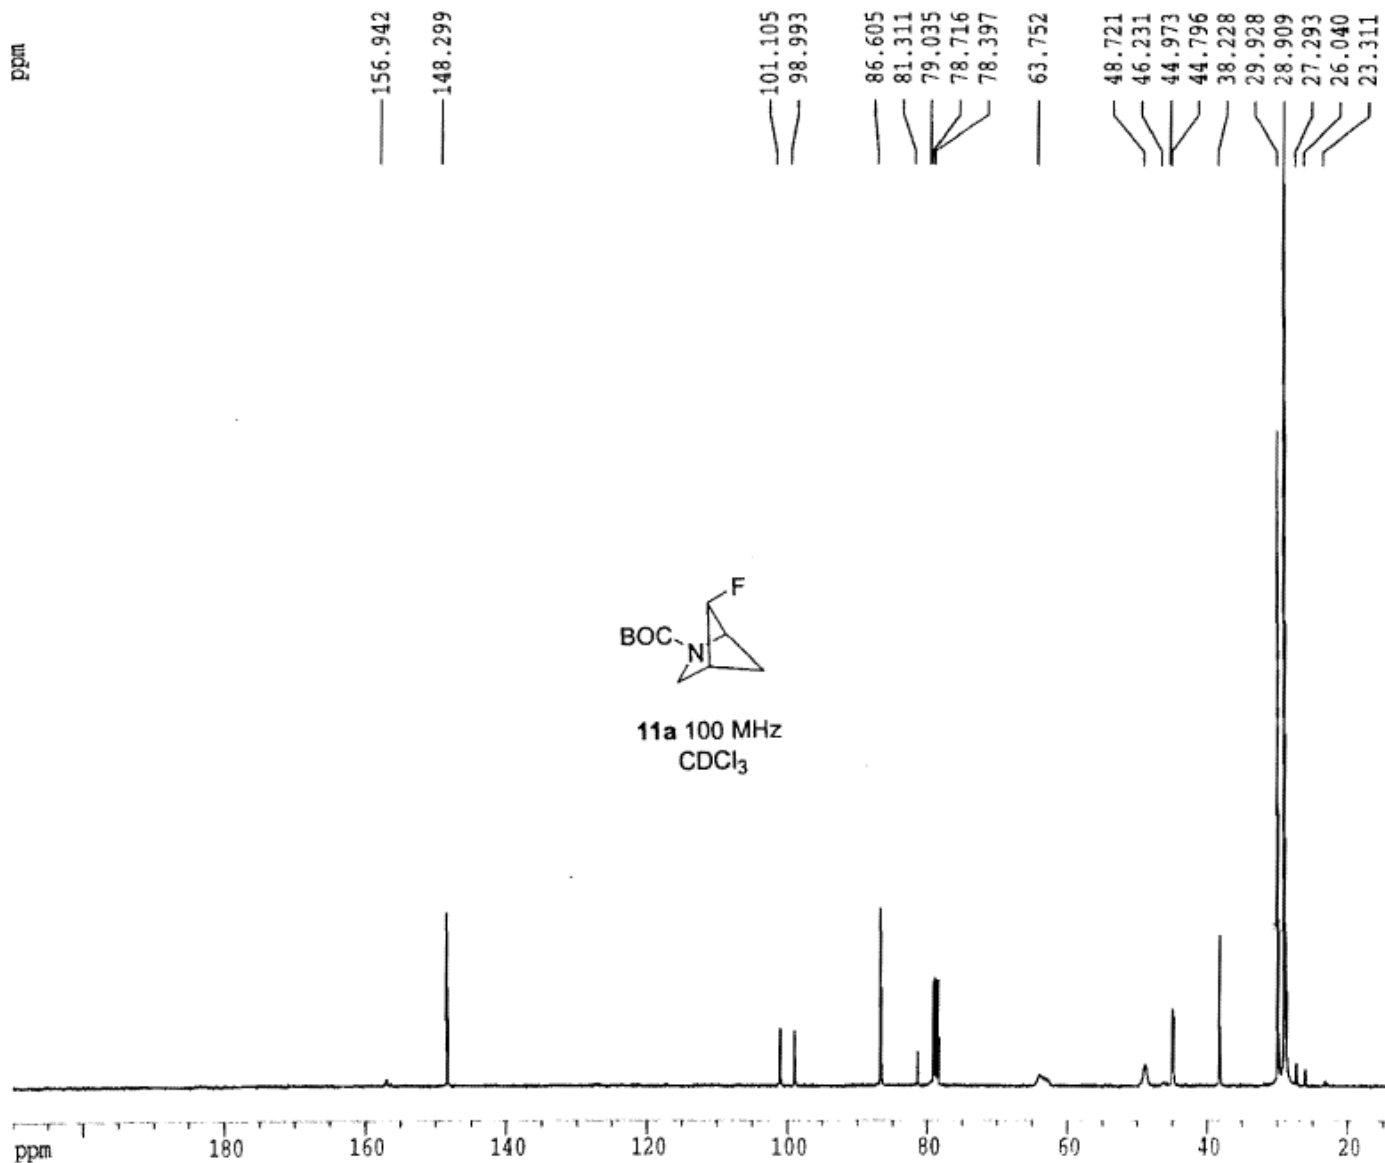

Current Data Parameters  
NAME deepa03  
EXPNO 40  
PROCNO 1

F2 - Acquisition Parameters  
Date\_ 20050110  
Time 10.40  
INSTRUM spect  
PROBHD 5 mm PABBO BB-  
PULPROG zgpgg50  
TD 65536  
SOLVENT CDCl3  
NS 1042  
DS 2  
SWH 25125.629 Hz  
FIDRES 0.383387 Hz  
AQ 1.3042164 sec  
RG 18390.4  
DW 19.900 use  
DE 6.00 use  
TE 300.0 K  
D1 2.00000000 sec  
d11 0.03000000 sec  
d12 0.00002000 sec

===== CHANNEL f1 =====  
NUC1 13C  
P1 5.70 use  
PL1 2.00 dB  
SFO1 100.5951275 MHz

===== CHANNEL f2 =====  
CPDPRG2 waltz16  
NUC2 1H  
PCPD2 92.00 use  
PL2 0.00 dB  
PL12 11.00 dB  
PL13 120.00 dB  
SFO2 400.0216001 MHz

F2 - Processing parameters  
SI 32768  
SF 100.5949428 MHz  
WDW EM  
SSB 0  
LB 3.00 Hz  
GB 0  
PC 1.40

1D NMR plot parameters  
CX 22.00 cm  
F1P 210.000 ppm  
F1 21122.84 Hz  
F2P -10.000 ppm  
F2 -1005.85 Hz  
PPMCM 10.00000 ppm/cm  
HZCM 1005.84949 Hz/cm

Conformationally Constrained 5-Fluoro- and 5-Hydroxymethanopyrrolidines

S-13

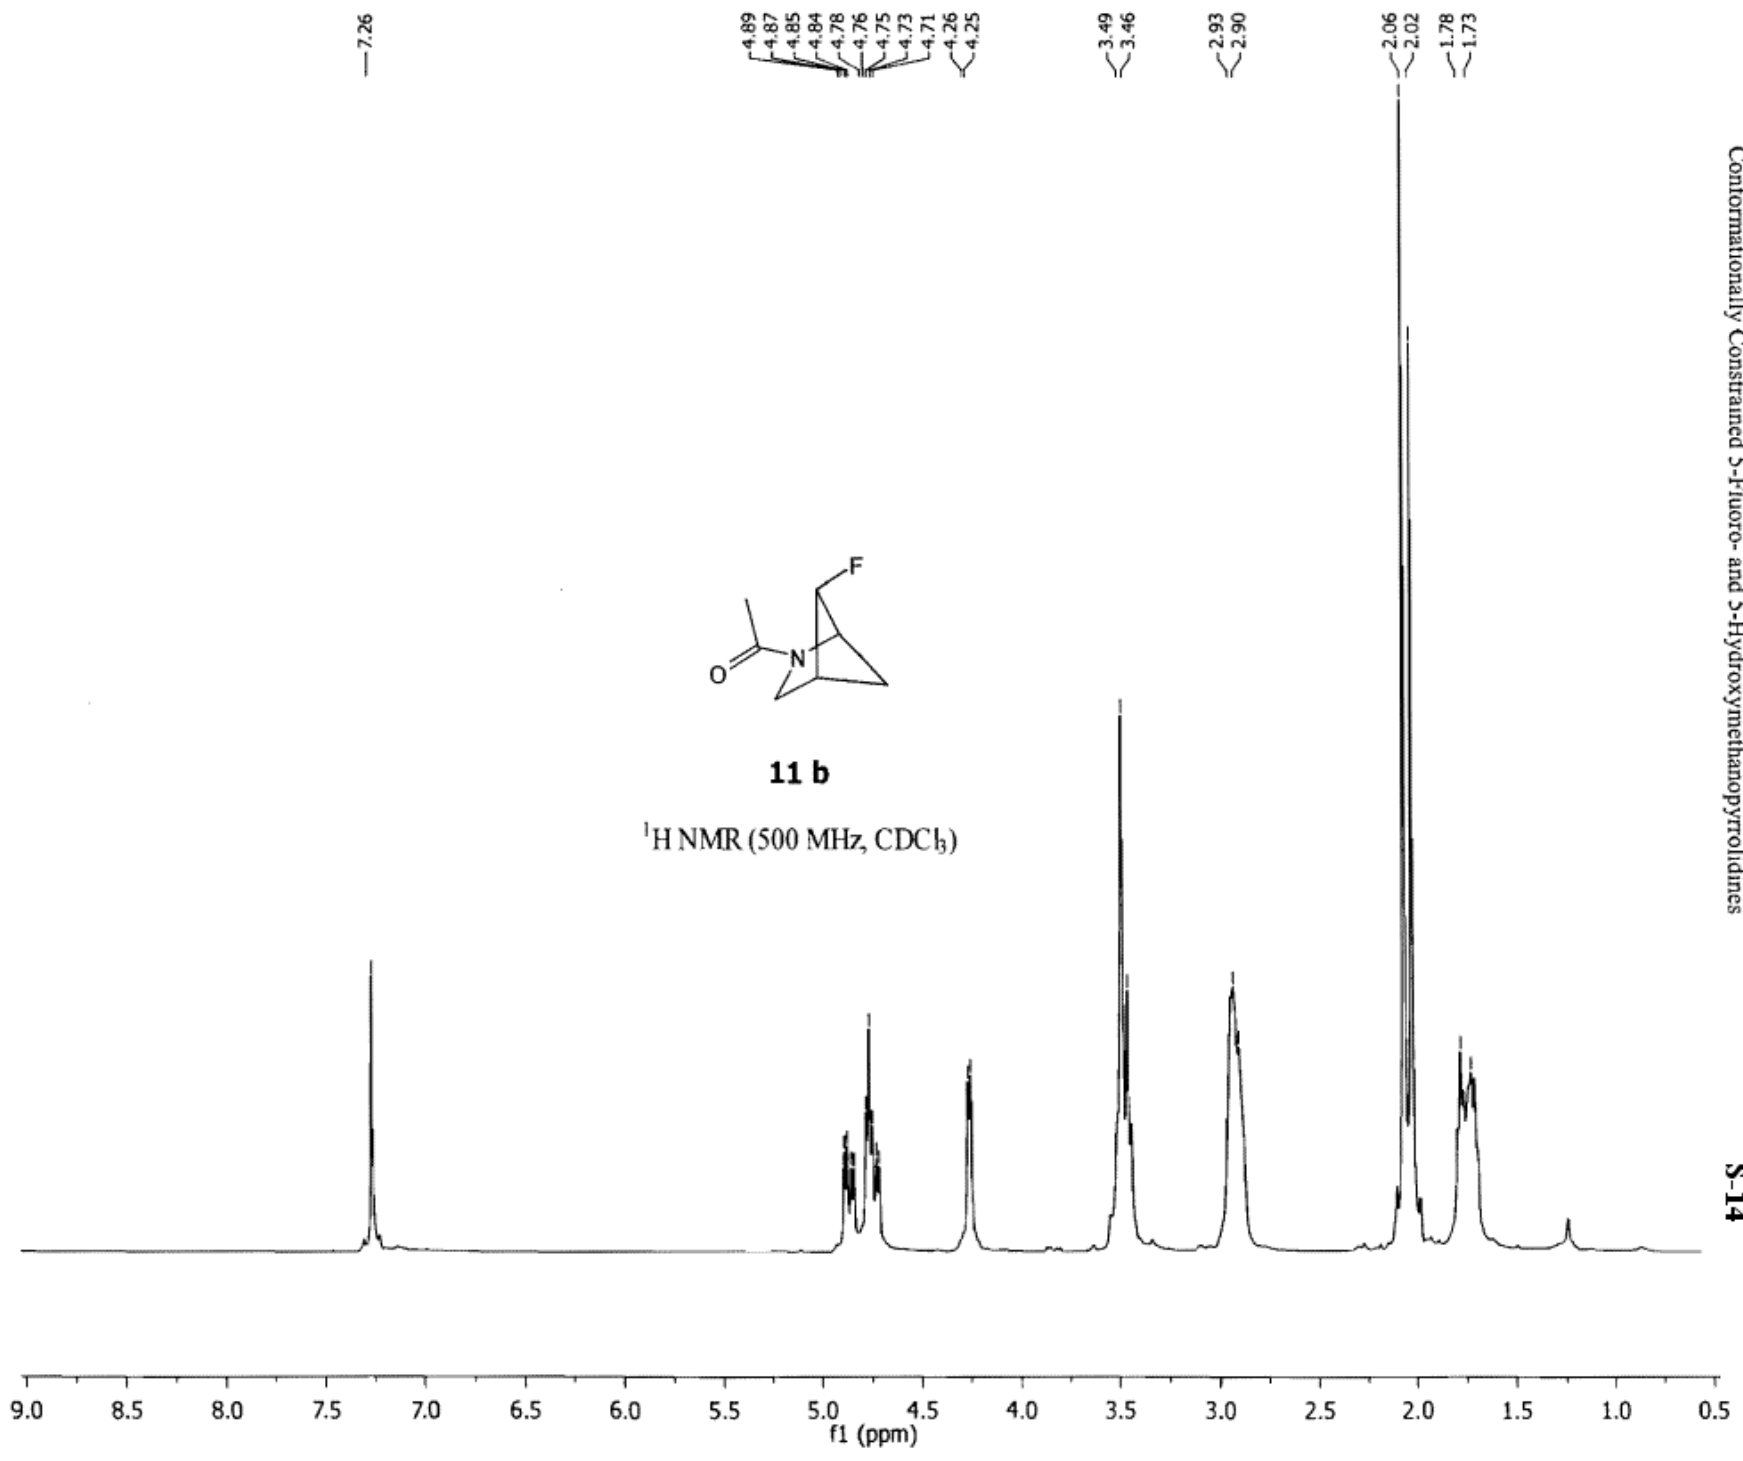

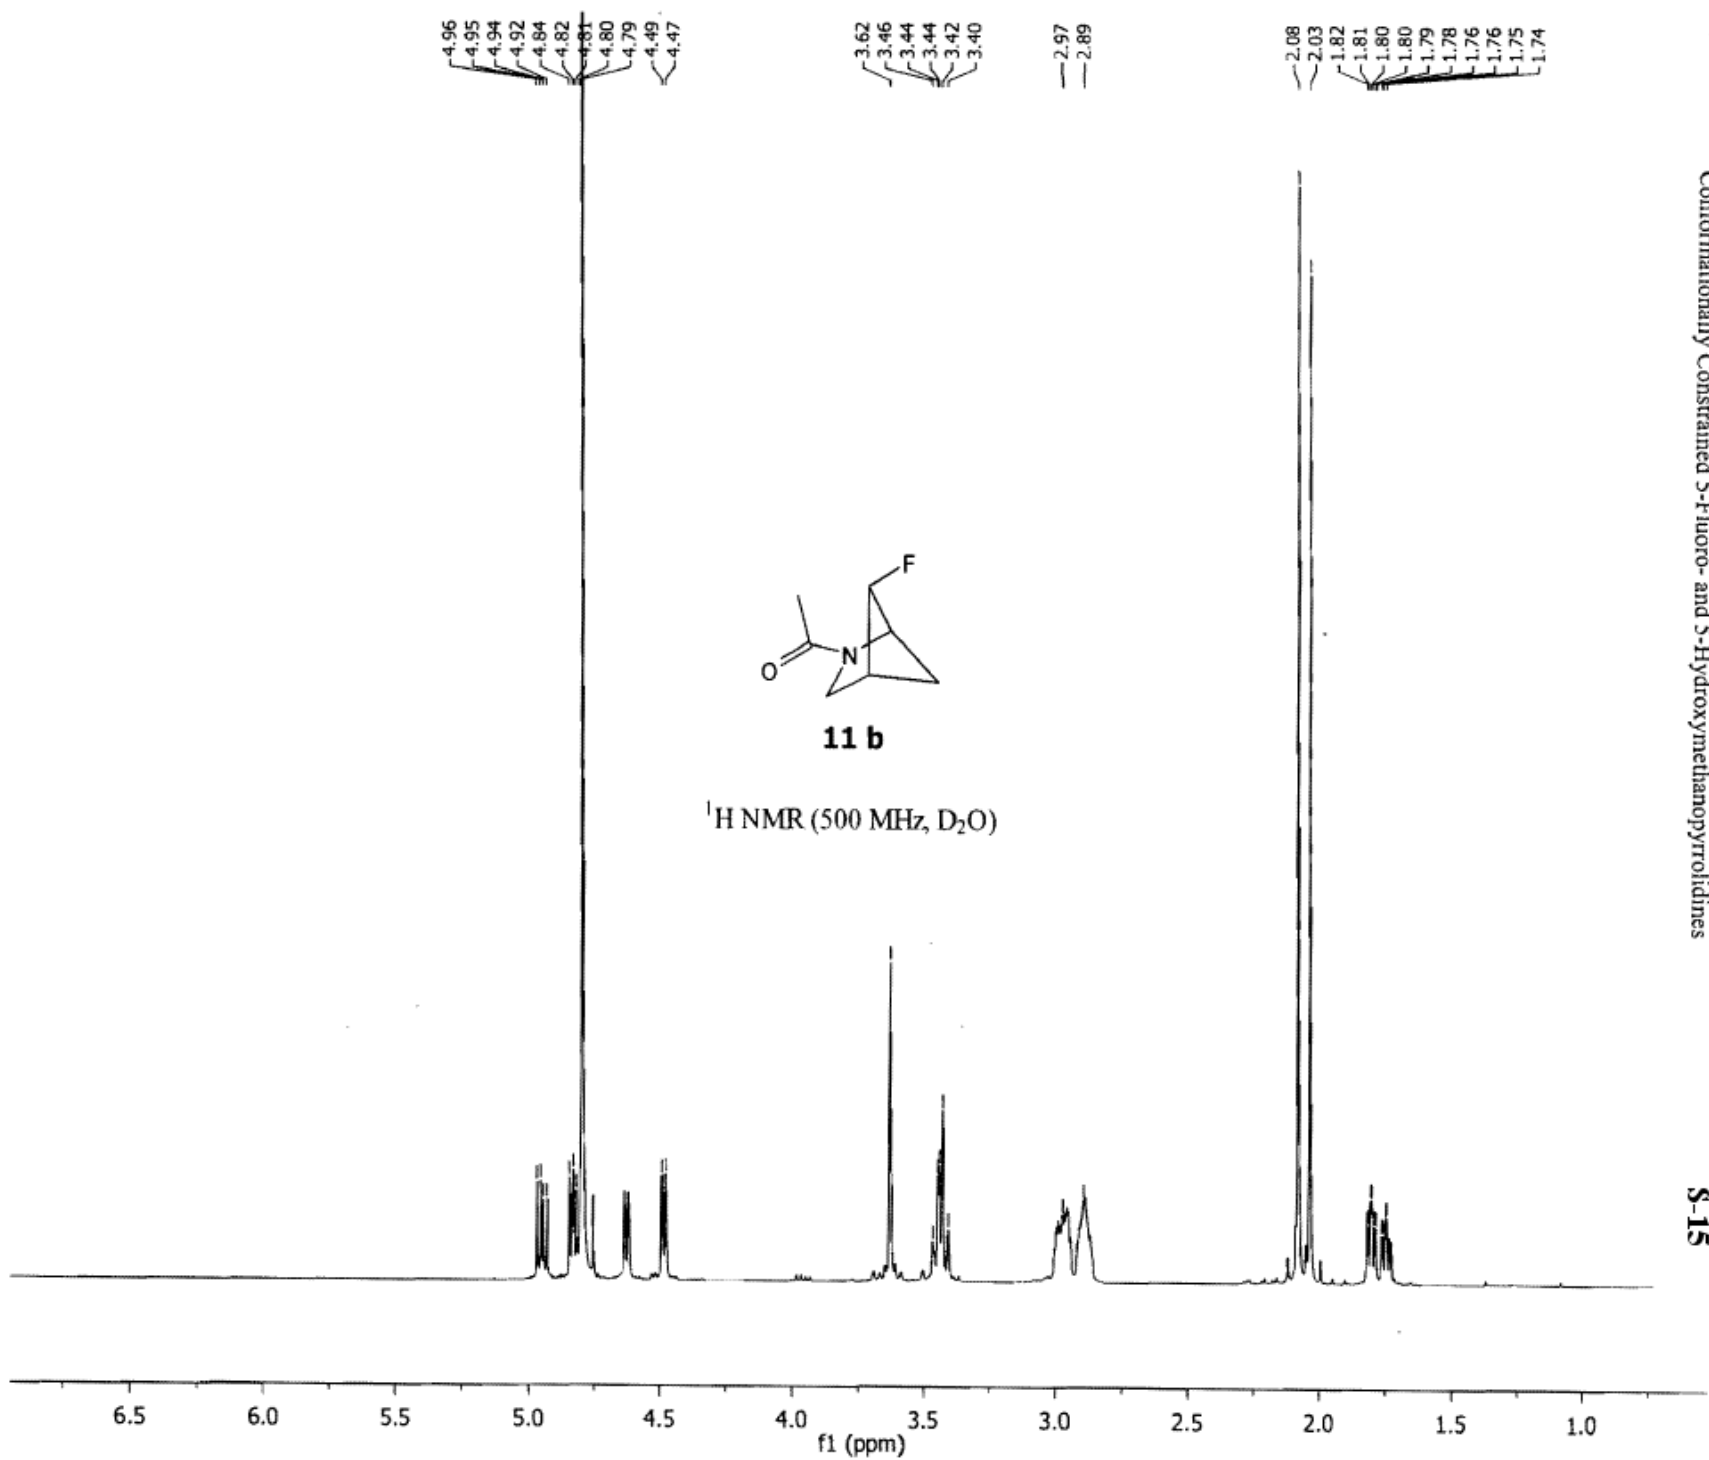

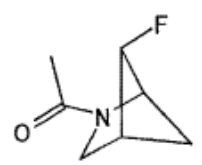

**11 b**

<sup>13</sup>C NMR (75 MHz, CDCl<sub>3</sub>)

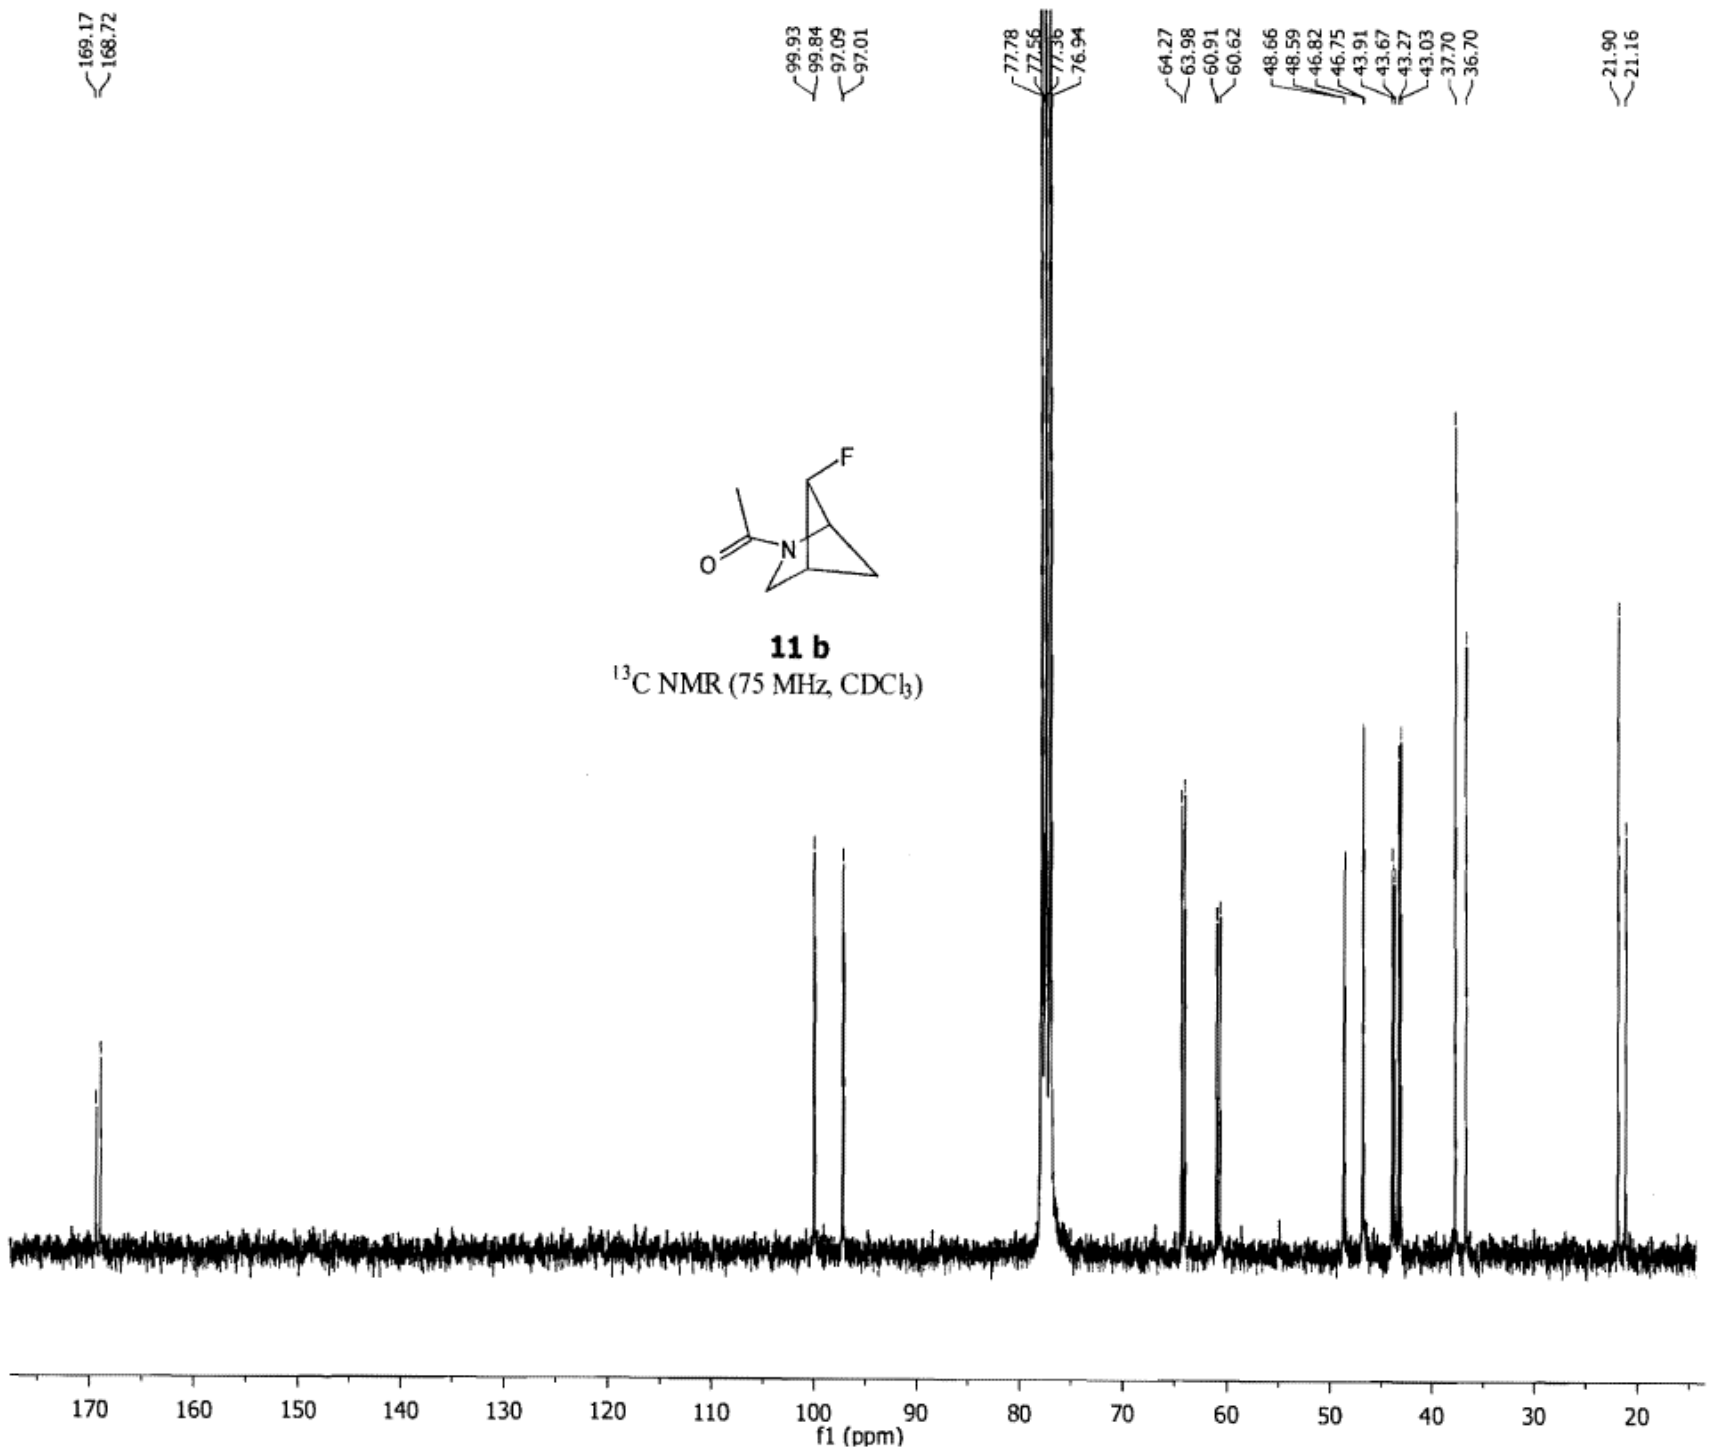



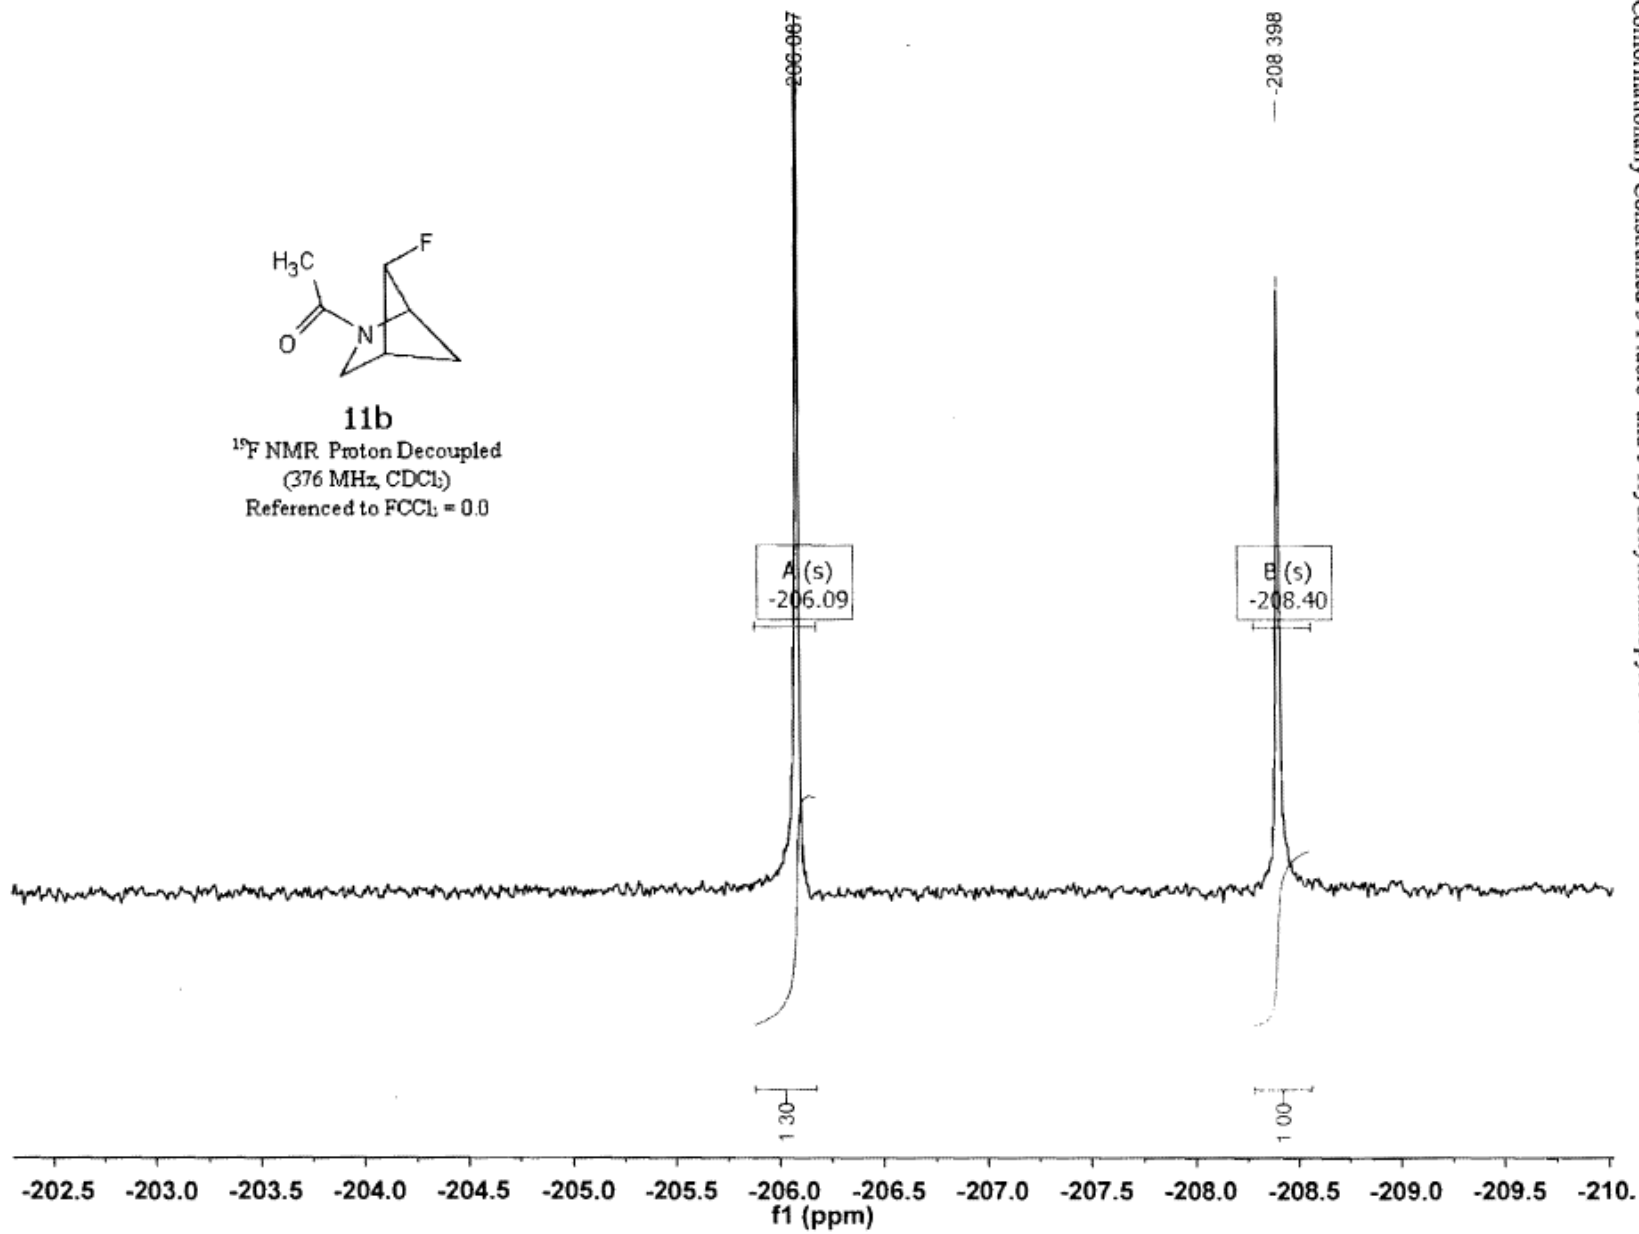

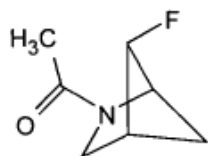**11b**

$^{19}\text{F}$  NMR Proton Decoupled  
(376 MHz,  $\text{D}_2\text{O}$ )  
Referenced to  $\text{FCCl}_3 = 0.0$

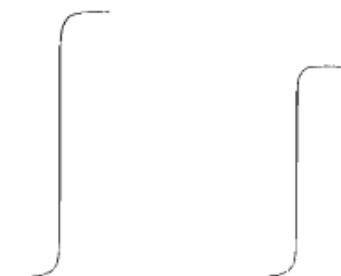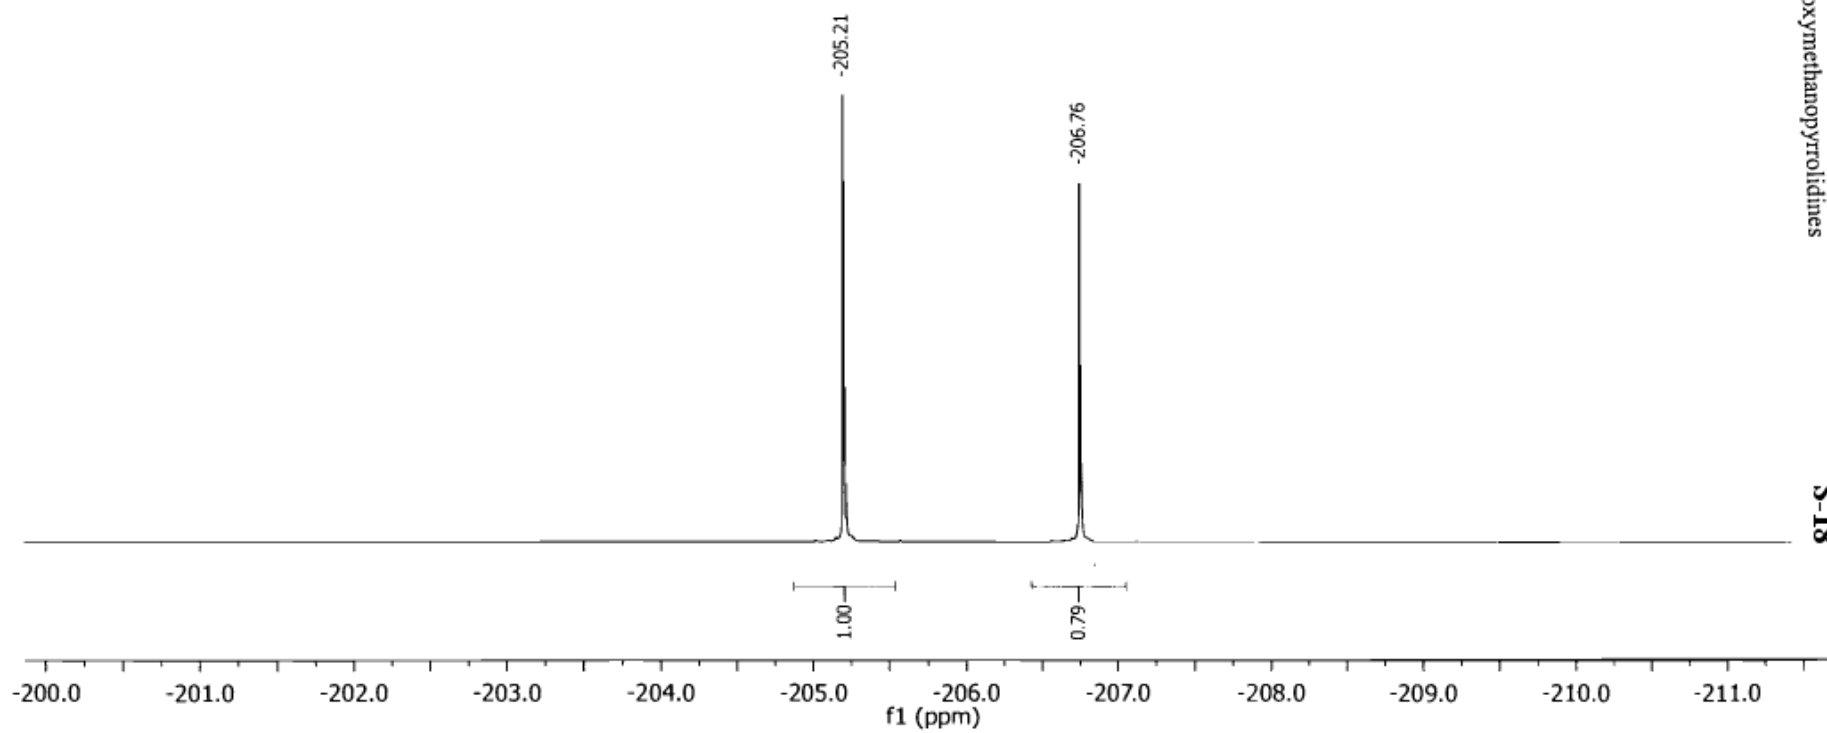

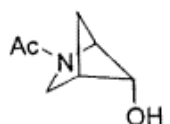

**12b** 400 MHz  
CDCl<sub>3</sub>

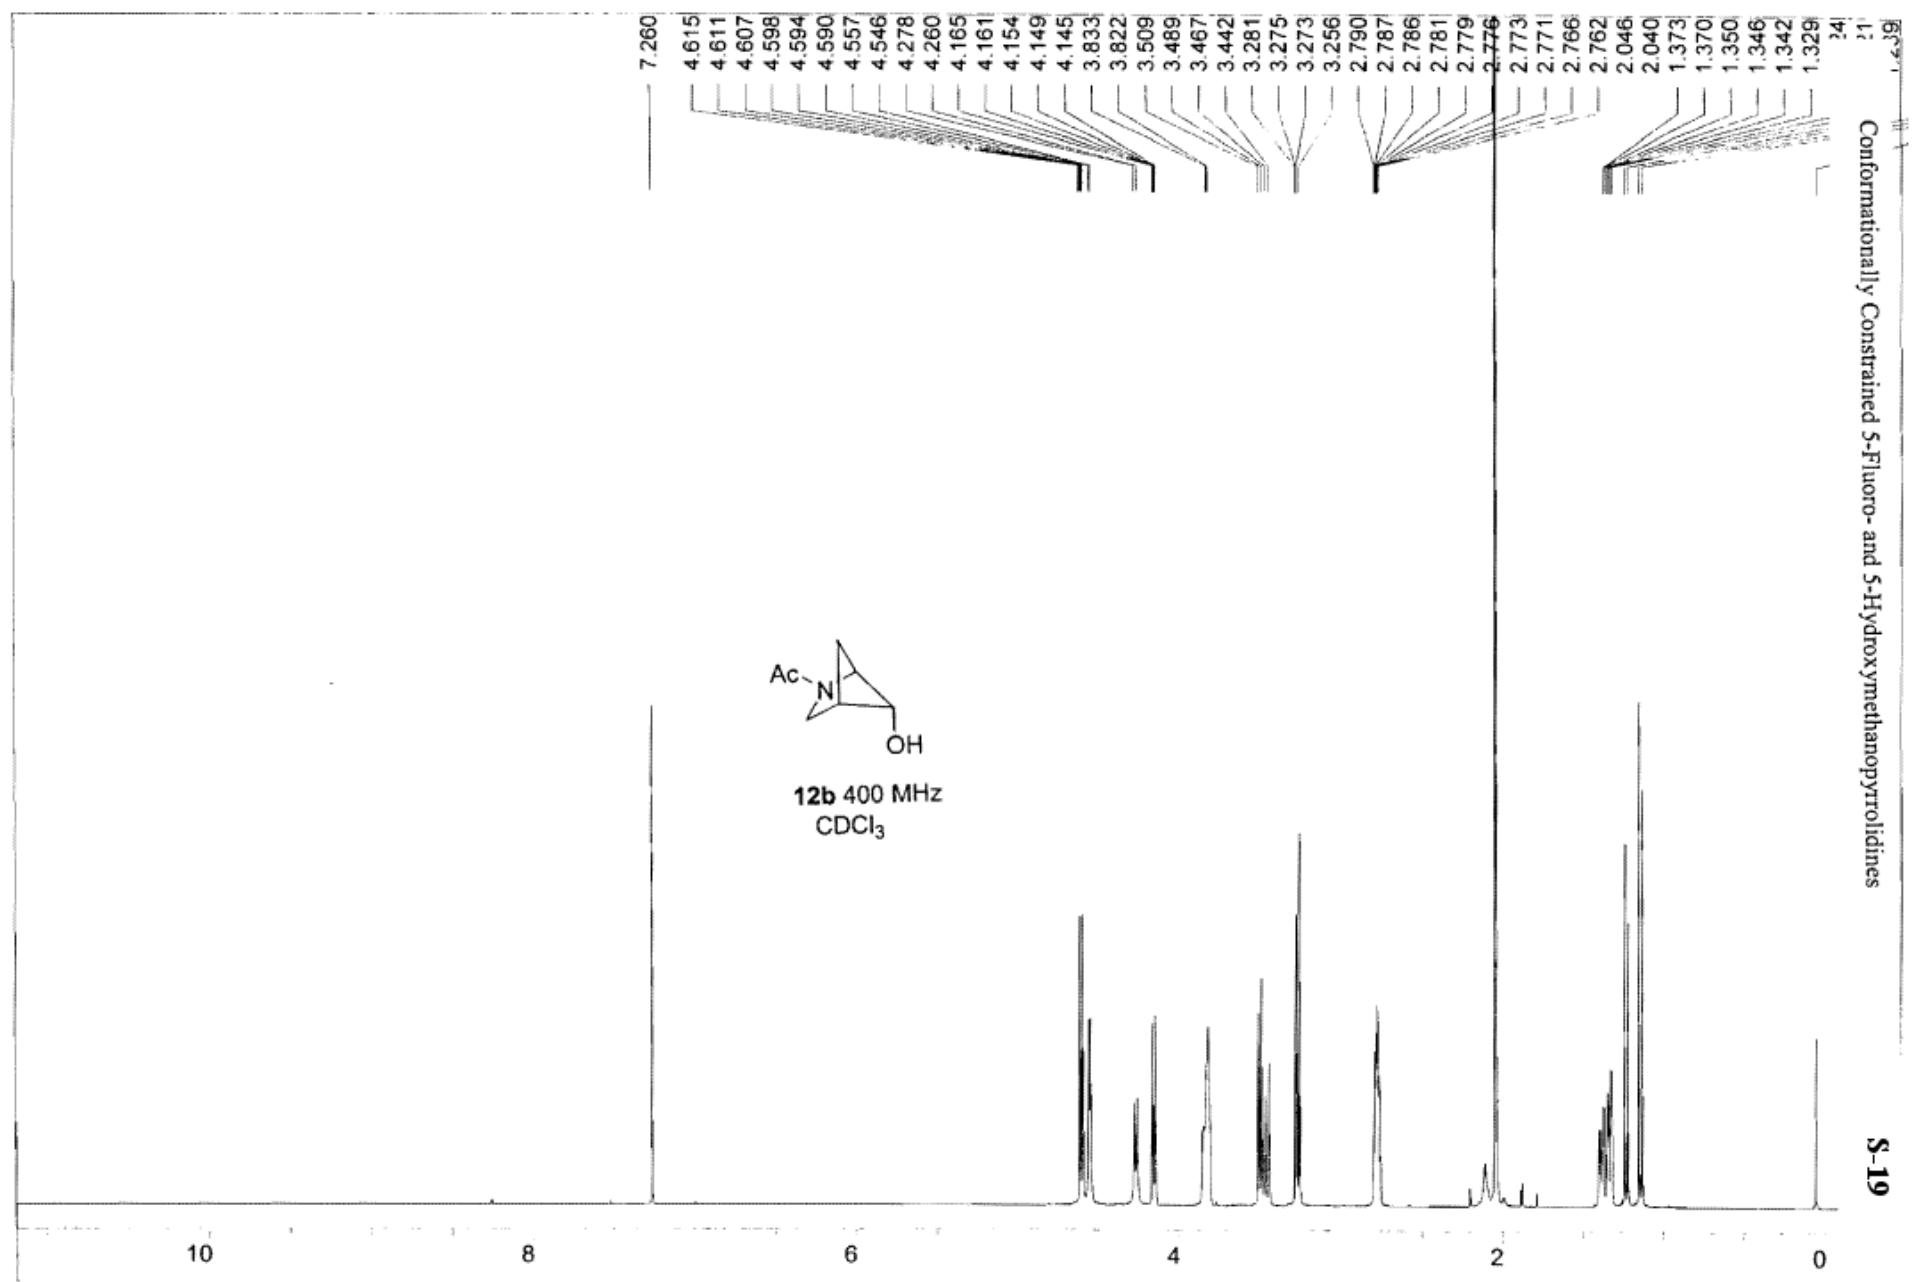

Conformationally Constrained 5-Fluoro- and 5-Hydroxymethanopyrrolidines

S-19

|                                           |           |                                                              |             |             |              |
|-------------------------------------------|-----------|--------------------------------------------------------------|-------------|-------------|--------------|
| NAc[2.1.1] syn-OH, proton10MIN,atm,       |           | USER: temple -- DATE: Nov 22 23:08:55 2008 EST (UT-5h) templ |             |             |              |
| F1: 400.130                               | F2: 1.000 | SW1: 8278                                                    |             | OF1: 2004.2 | PTS1d: 32768 |
| EX:                                       |           | PW: 9.8 usec                                                 | PD: 1.0 sec | NA: 128     | LB: 0.1      |
| WinNuts - NAc[2.1.1] syn-OH--H--eram-1681 |           |                                                              |             |             |              |

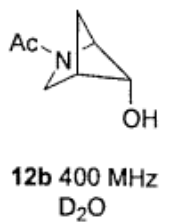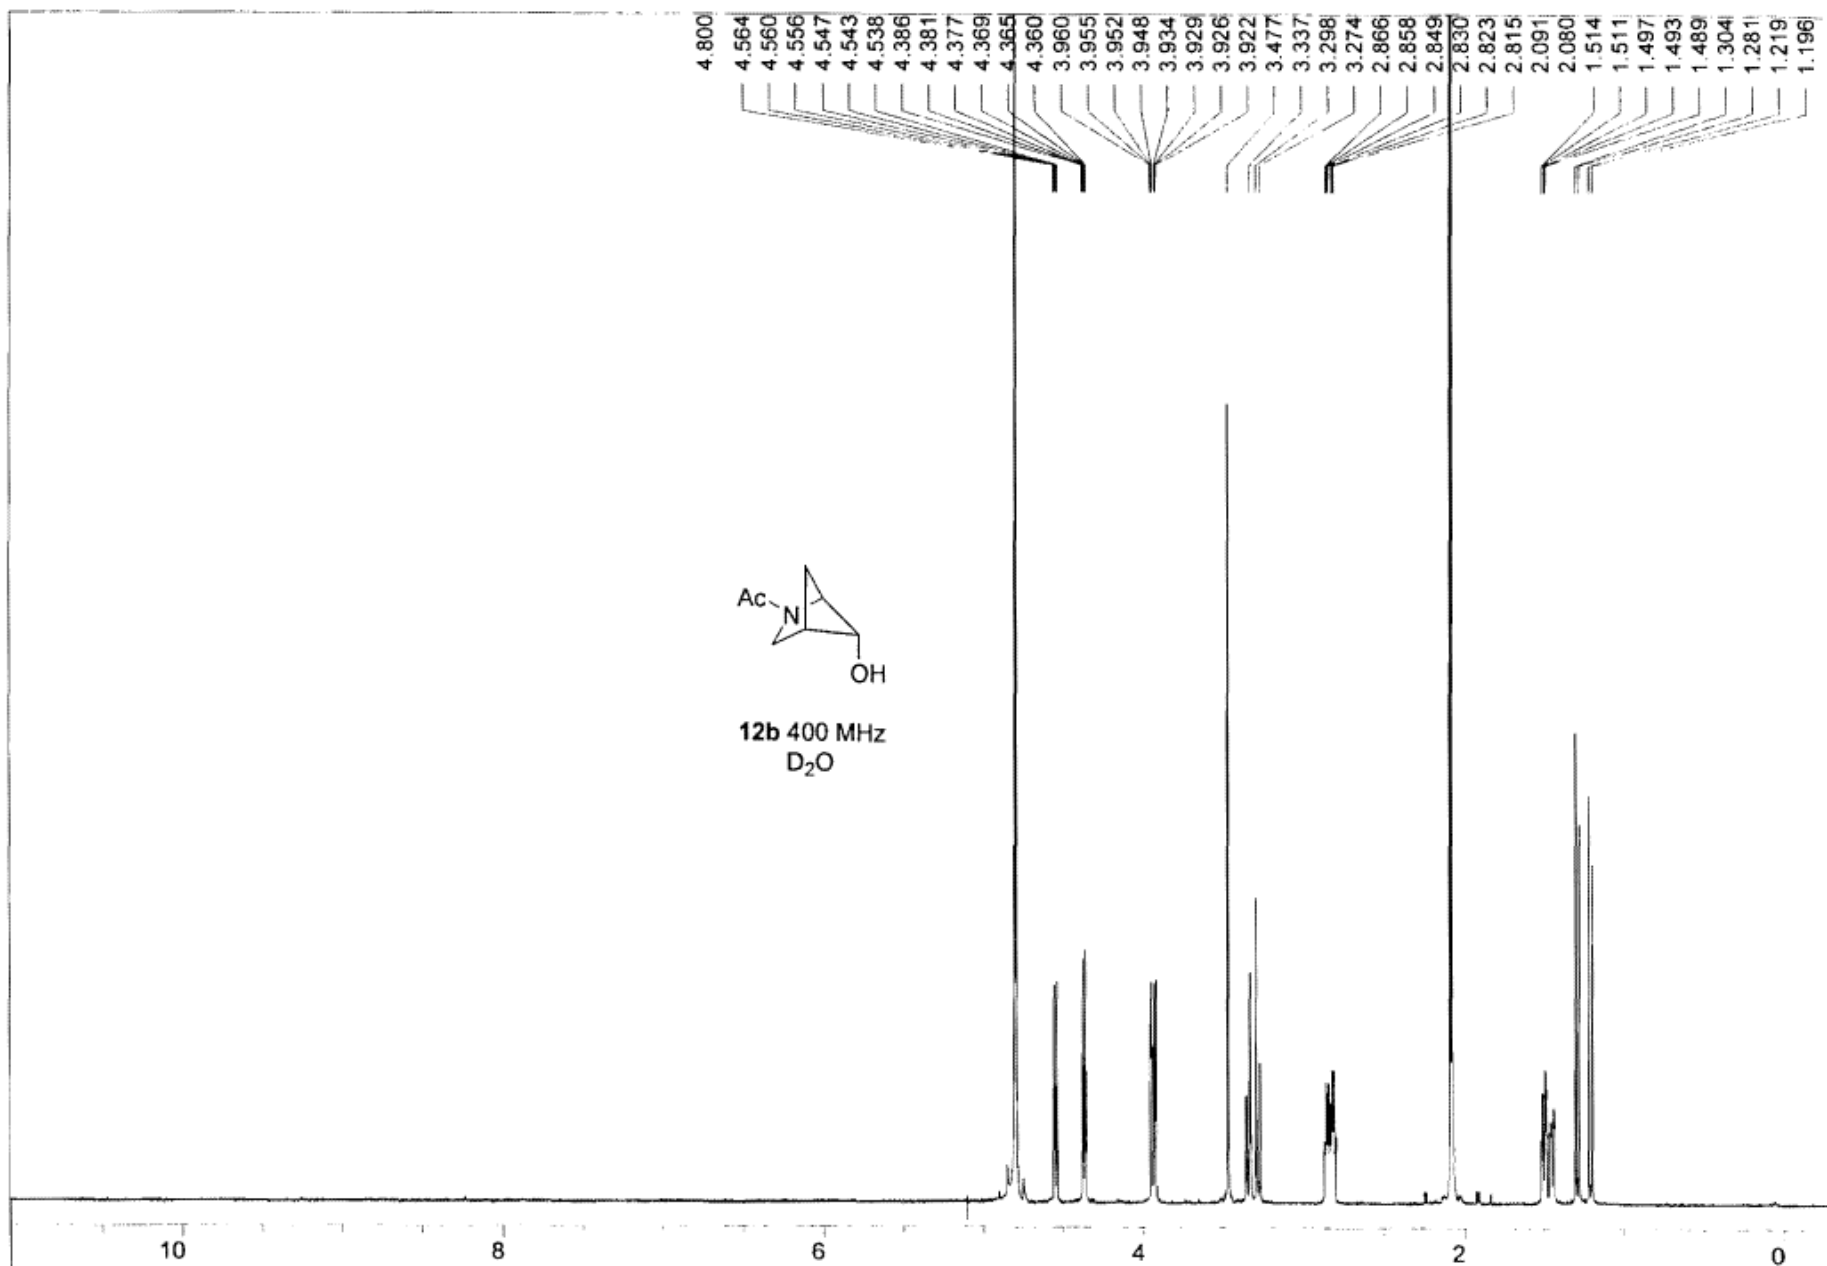

|                                     |              |             |                                                              |              |                                               |
|-------------------------------------|--------------|-------------|--------------------------------------------------------------|--------------|-----------------------------------------------|
| NAC[2.1.1] syn-OH, proton10MIN.atm, |              |             | USER: temple -- DATE: Dec 12 10:19:09 2008 EST (UT-5h) templ |              |                                               |
| F1: 400.130                         | F2: 1.000    | SW1: 8278   | OF1: 2041.3                                                  | PTS1d: 32768 |                                               |
| EX:                                 | PW: 9.8 usec | PD: 1.0 sec | NA: 228                                                      | LB: 0.1      | WinNuts - NAC[2.1.1] syn-OH-H-eram-1689 (D2O) |

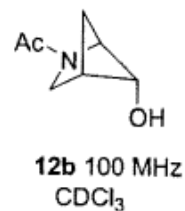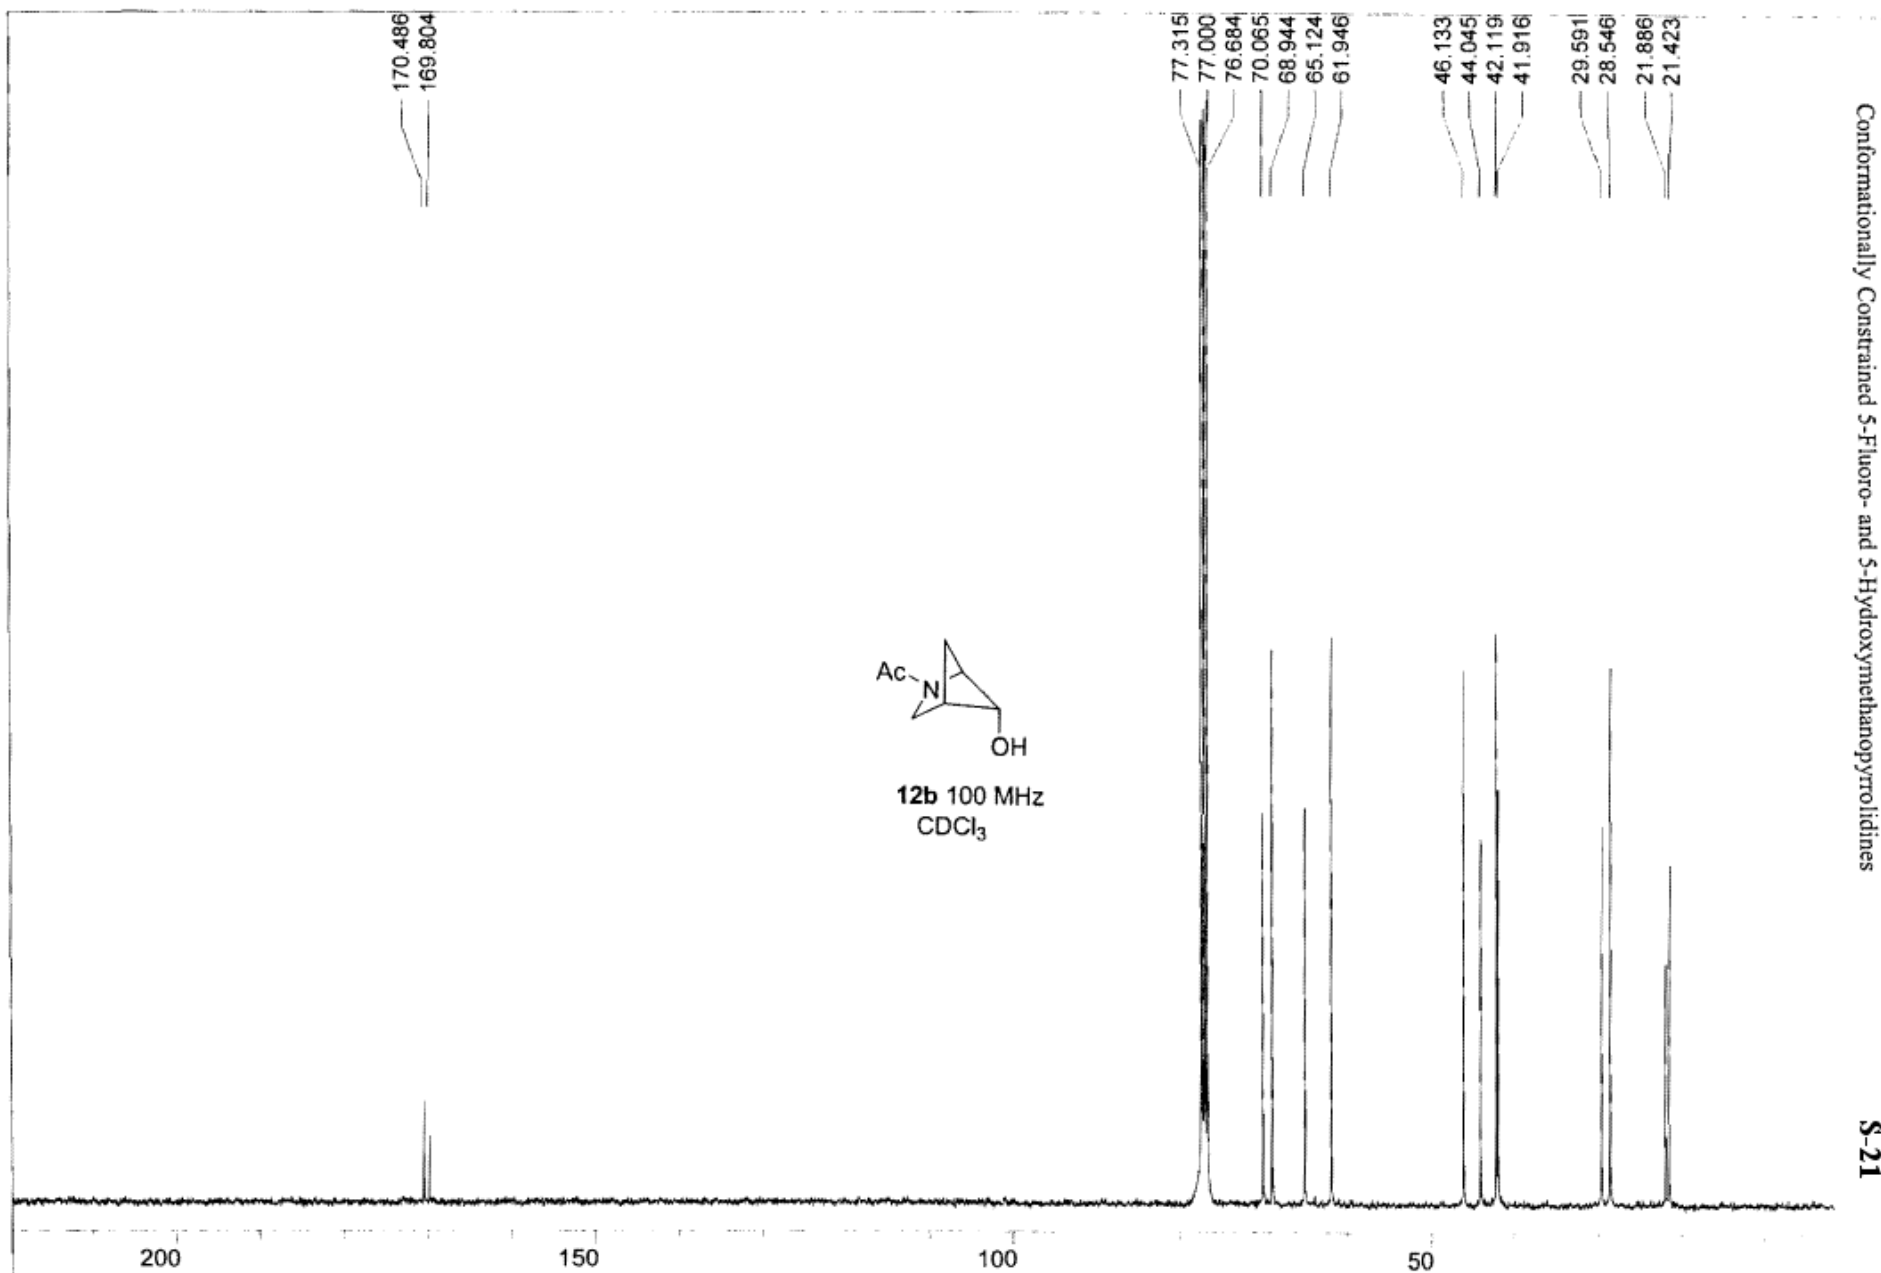

NAC[2.1.1] syn-OH, carbonOVNTE,all,

F1: 100.613

F2: 1.000

SW1: 25126

OF1: 10021.1

USER: temple -- DATE: Nov 23 09:18:27 2008 EST (UT-5h) templ

PTS1d: 32768

EX:

PW: 5.7 usec

PD: 2.0 sec

NA: 11000

LB: 3.0

WinNuts - NAC[2.1.1] syn-OH--C--eram-1682

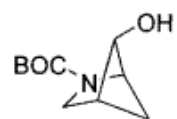

13a 400 MHz  
CDCl<sub>3</sub>

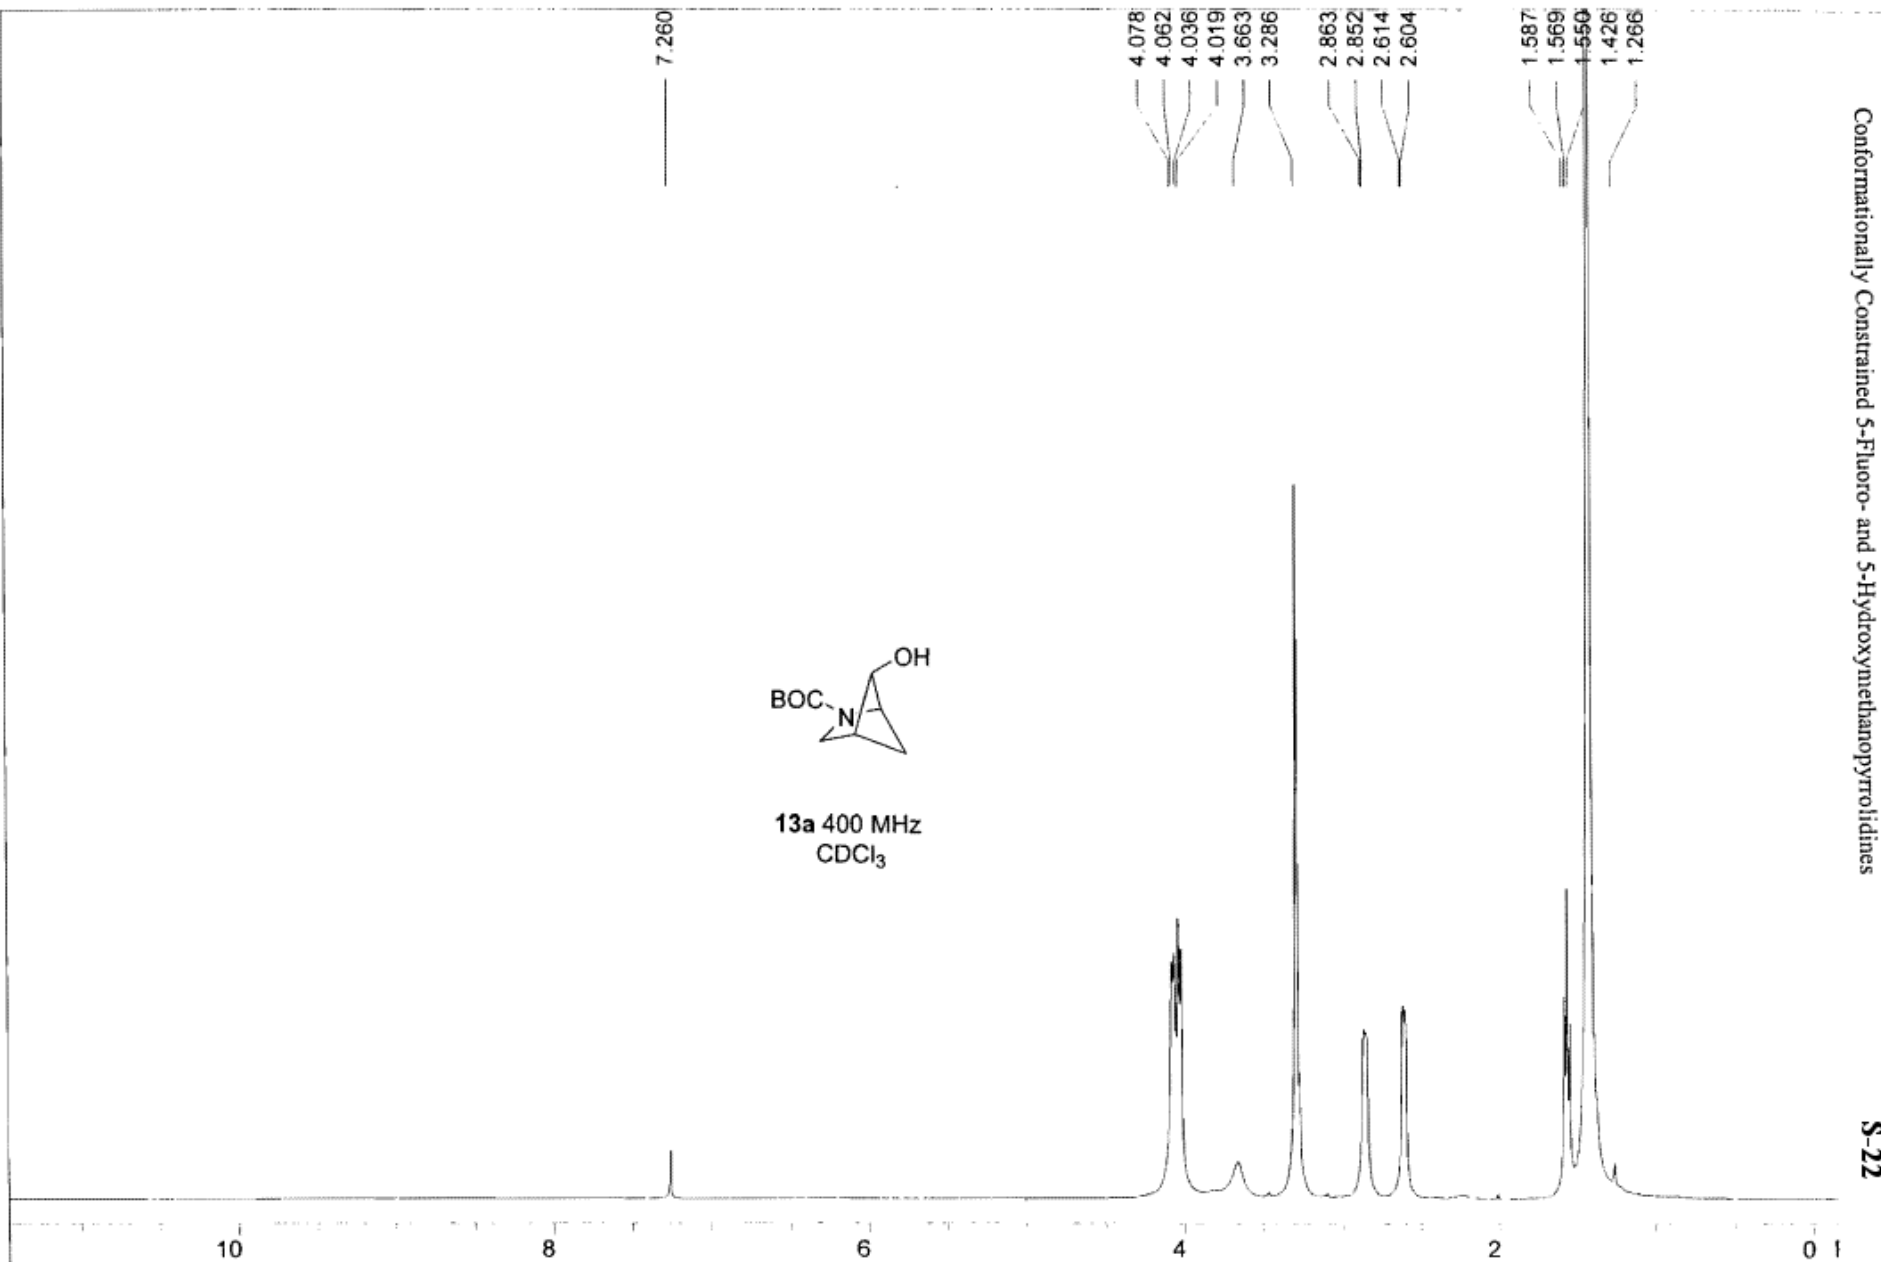

NBoc[2.1.1] OH, proton.atm.

USER: temple -- DATE: Nov 17 23:15:59 2007 EST (UT-5h) temp1

F1: 400.191

F2: 1.000

SW1: 8278

OF1: 2003.2

PTS1d: 32768

EX:

PW: 9.8 usec

PD: 1.0 sec

NA: 16

LB: 0.1

WinNuts - NBoc[2.1.1] anti-OH---H---eram-800

Conformationally Constrained 5-Fluoro- and 5-Hydroxymethanopyrrolidines

S-23

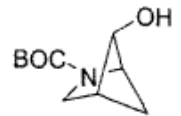

13a 100 MHz  
CDCl<sub>3</sub>

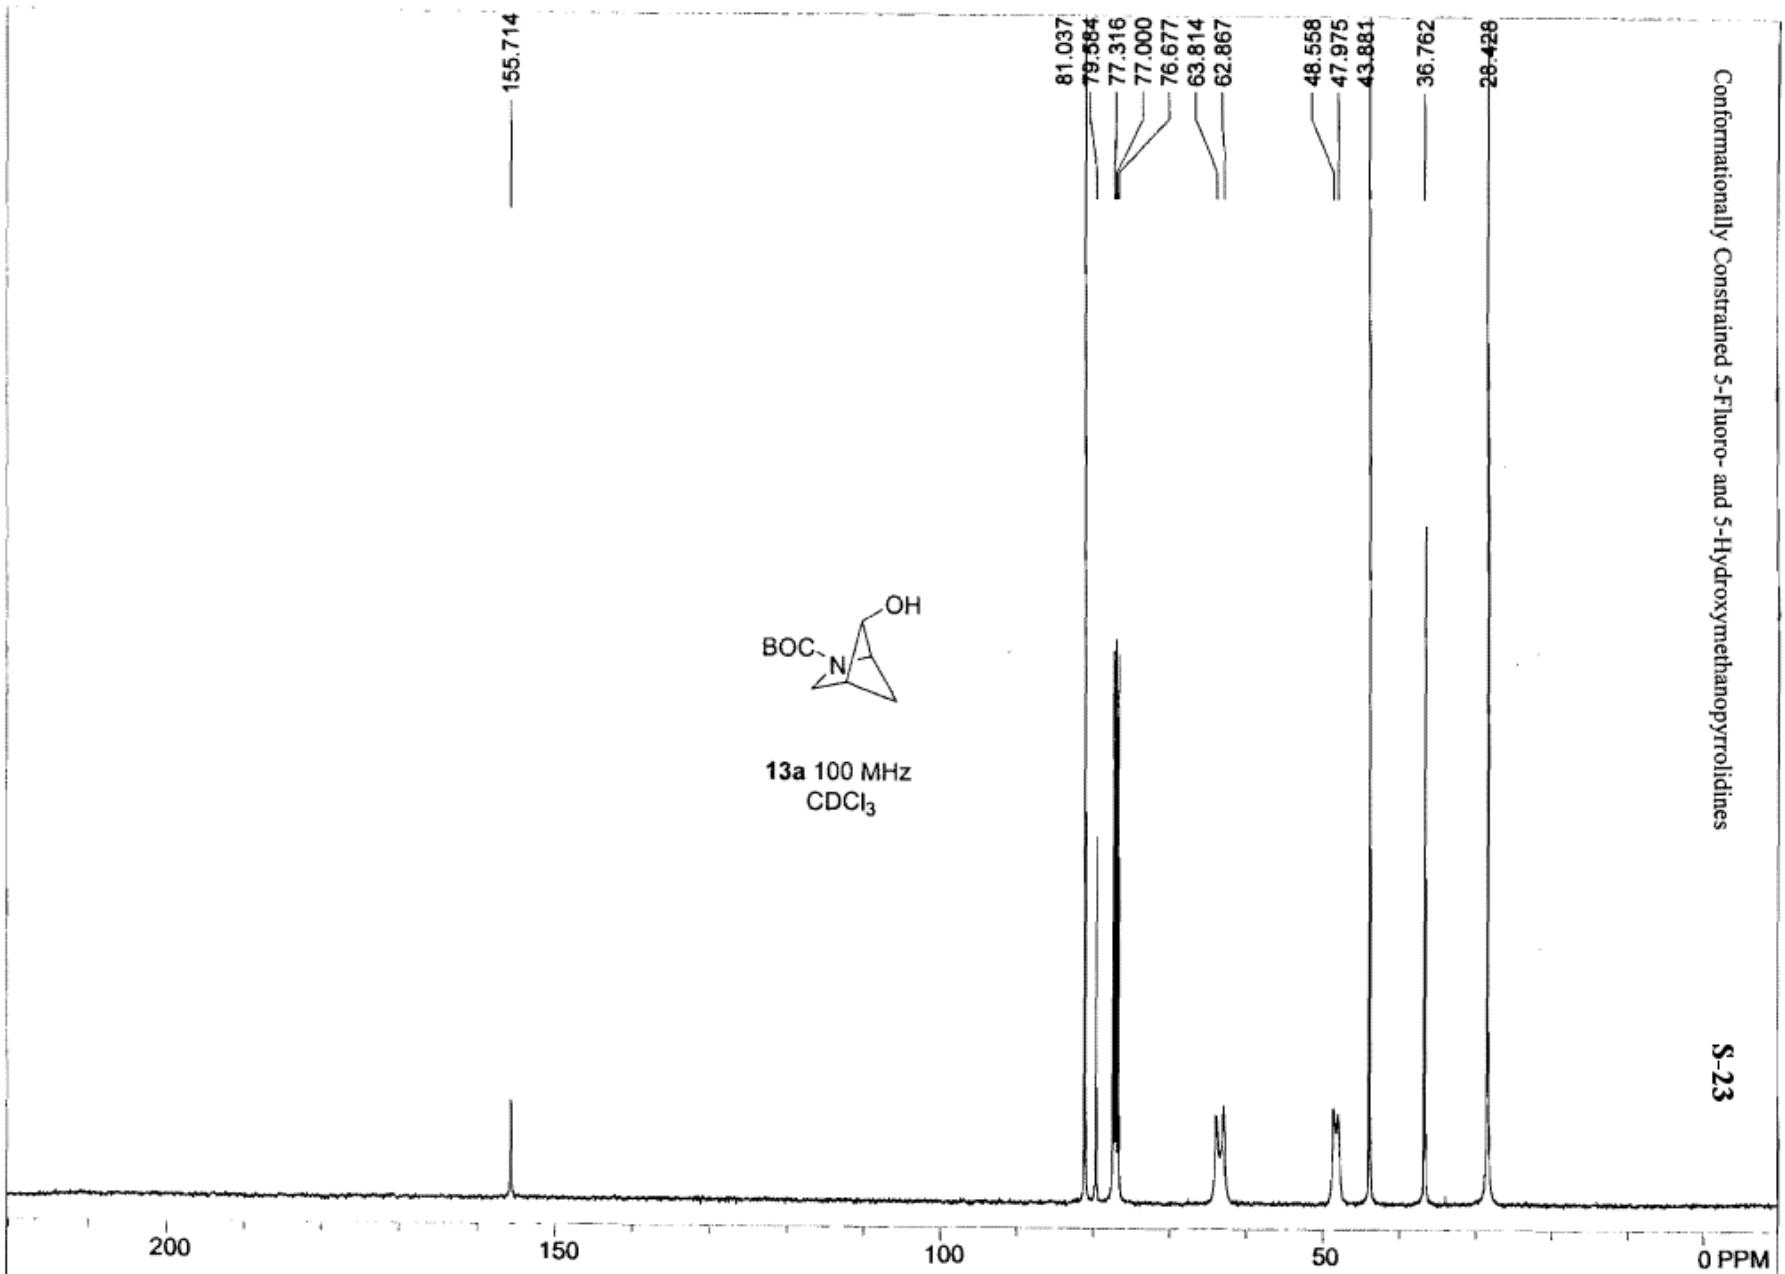

|                                 |           |                                                              |             |              |         |                                         |  |
|---------------------------------|-----------|--------------------------------------------------------------|-------------|--------------|---------|-----------------------------------------|--|
| NBoc[2.1.1] OH, carbon2HR, atm, |           | USER: temple -- DATE: Nov 18 07:55:18 2007 EST (UT-5h) templ |             |              |         |                                         |  |
| F1: 100.628                     | F2: 1.000 | SW1: 23148                                                   |             | OF1: 10581.5 |         | PTS1d: 32768                            |  |
| EX:                             |           | PW: 5.7 us                                                   | PD: 2.0 sec | NA: 9048     | LB: 3.0 | Nuts - NBoc[2.1.1] anti-OH--C--eram-801 |  |

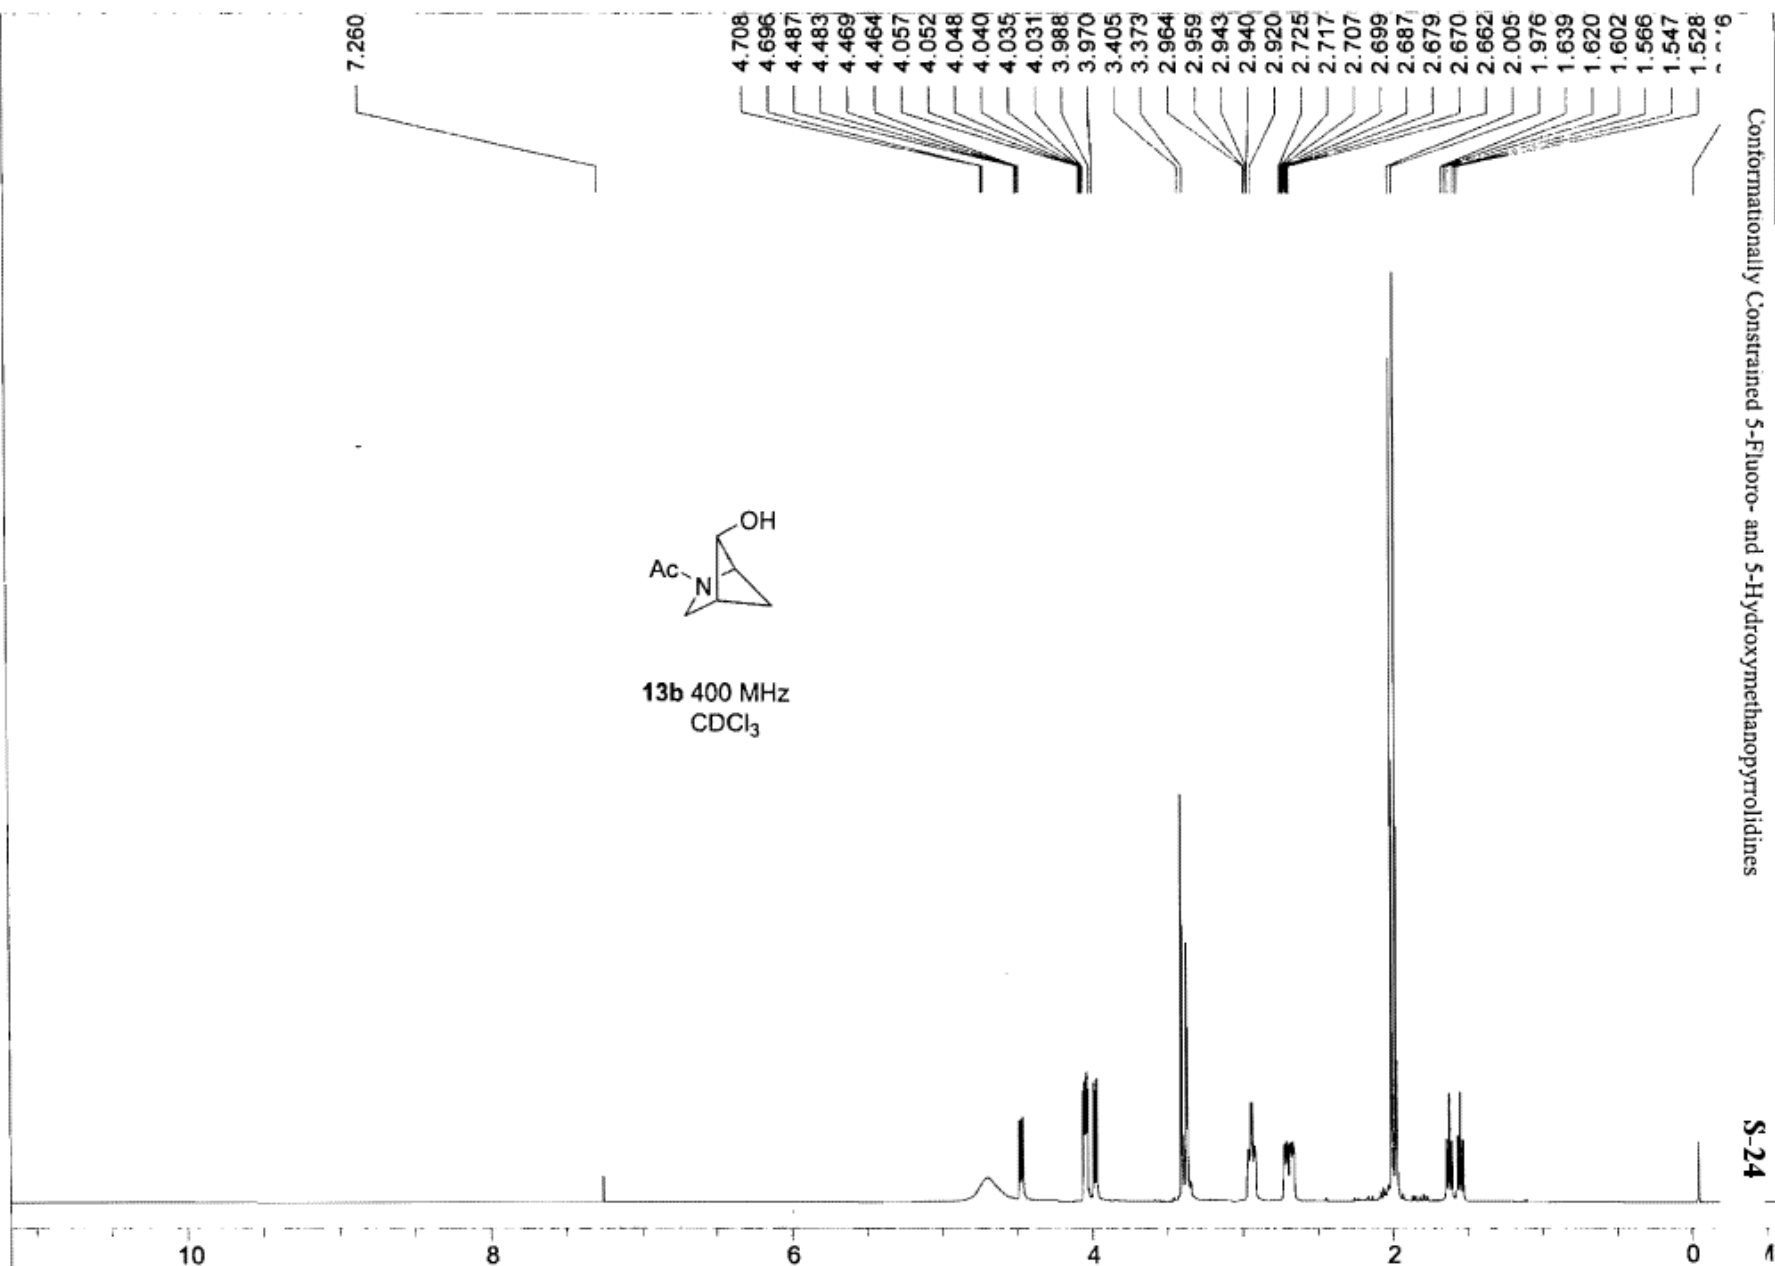

NAc[2.1.1]OH, proton atm.

USER: temple -- DATE: Jan 26 01:24:49 2008 EST (UT-5h) temp1

|             |            |             |             |              |
|-------------|------------|-------------|-------------|--------------|
| F1: 400.130 | F2: 1.000  | SW1: 8278   | OF1: 2004.2 | PTS1d: 32768 |
| EX:         | PW: 9.8 us | PD: 1.0 sec | NA: 16      | LB: 0.1      |

Nuts - NAc[2.1.1] anti-OH--H--CDCl<sub>3</sub>--eram-824



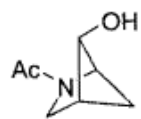

13b 400 MHz  
D<sub>2</sub>O

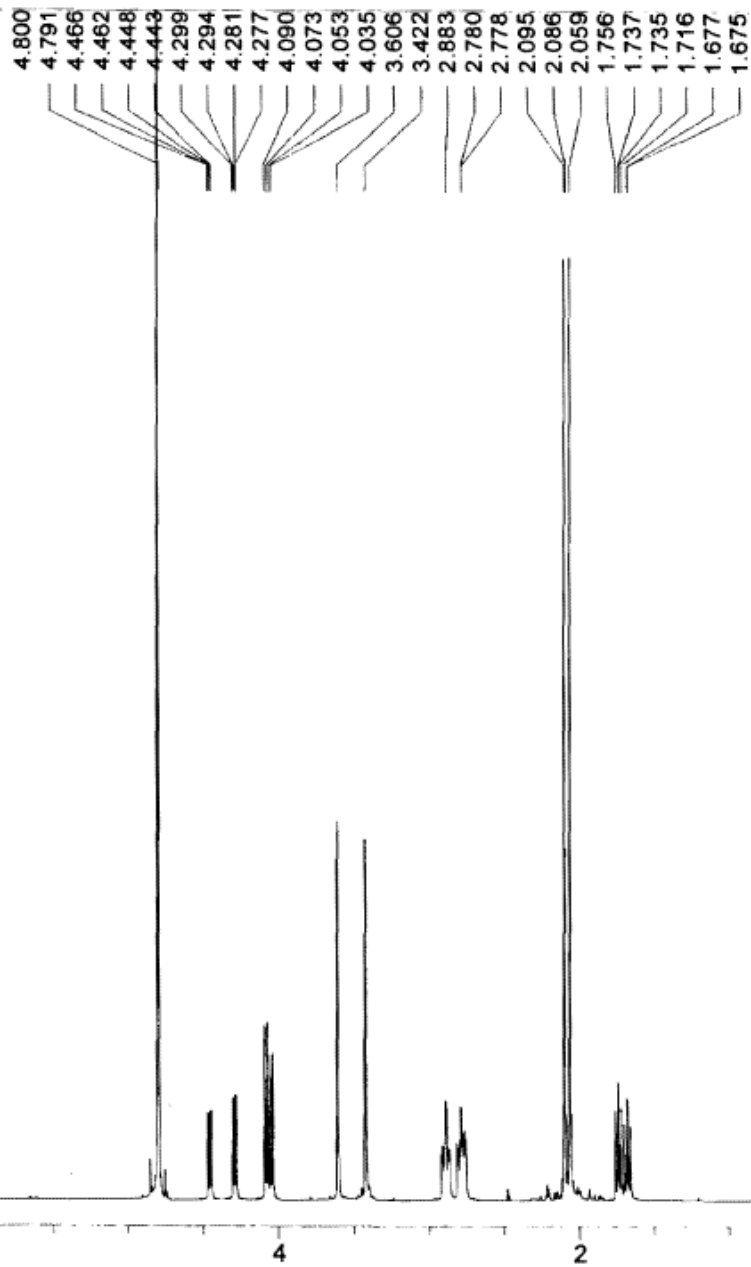

NAc[2.1.1] anti-OH, proton10MIN.atm.

USER: temple -- DATE: Jul 16 16:00:11 2008 EDT (UT-4h) templ

F1: 400.130

F2: 1.000

SW1: 8278

OF1: 2040.5

PTS1d: 32768

EX:

PW: 9.8 us

PD: 1.0 sec

NA: 228

LB: 0.1

Nuts - NAc[2.1.1] anti-OH--H--D2O--eram-1400

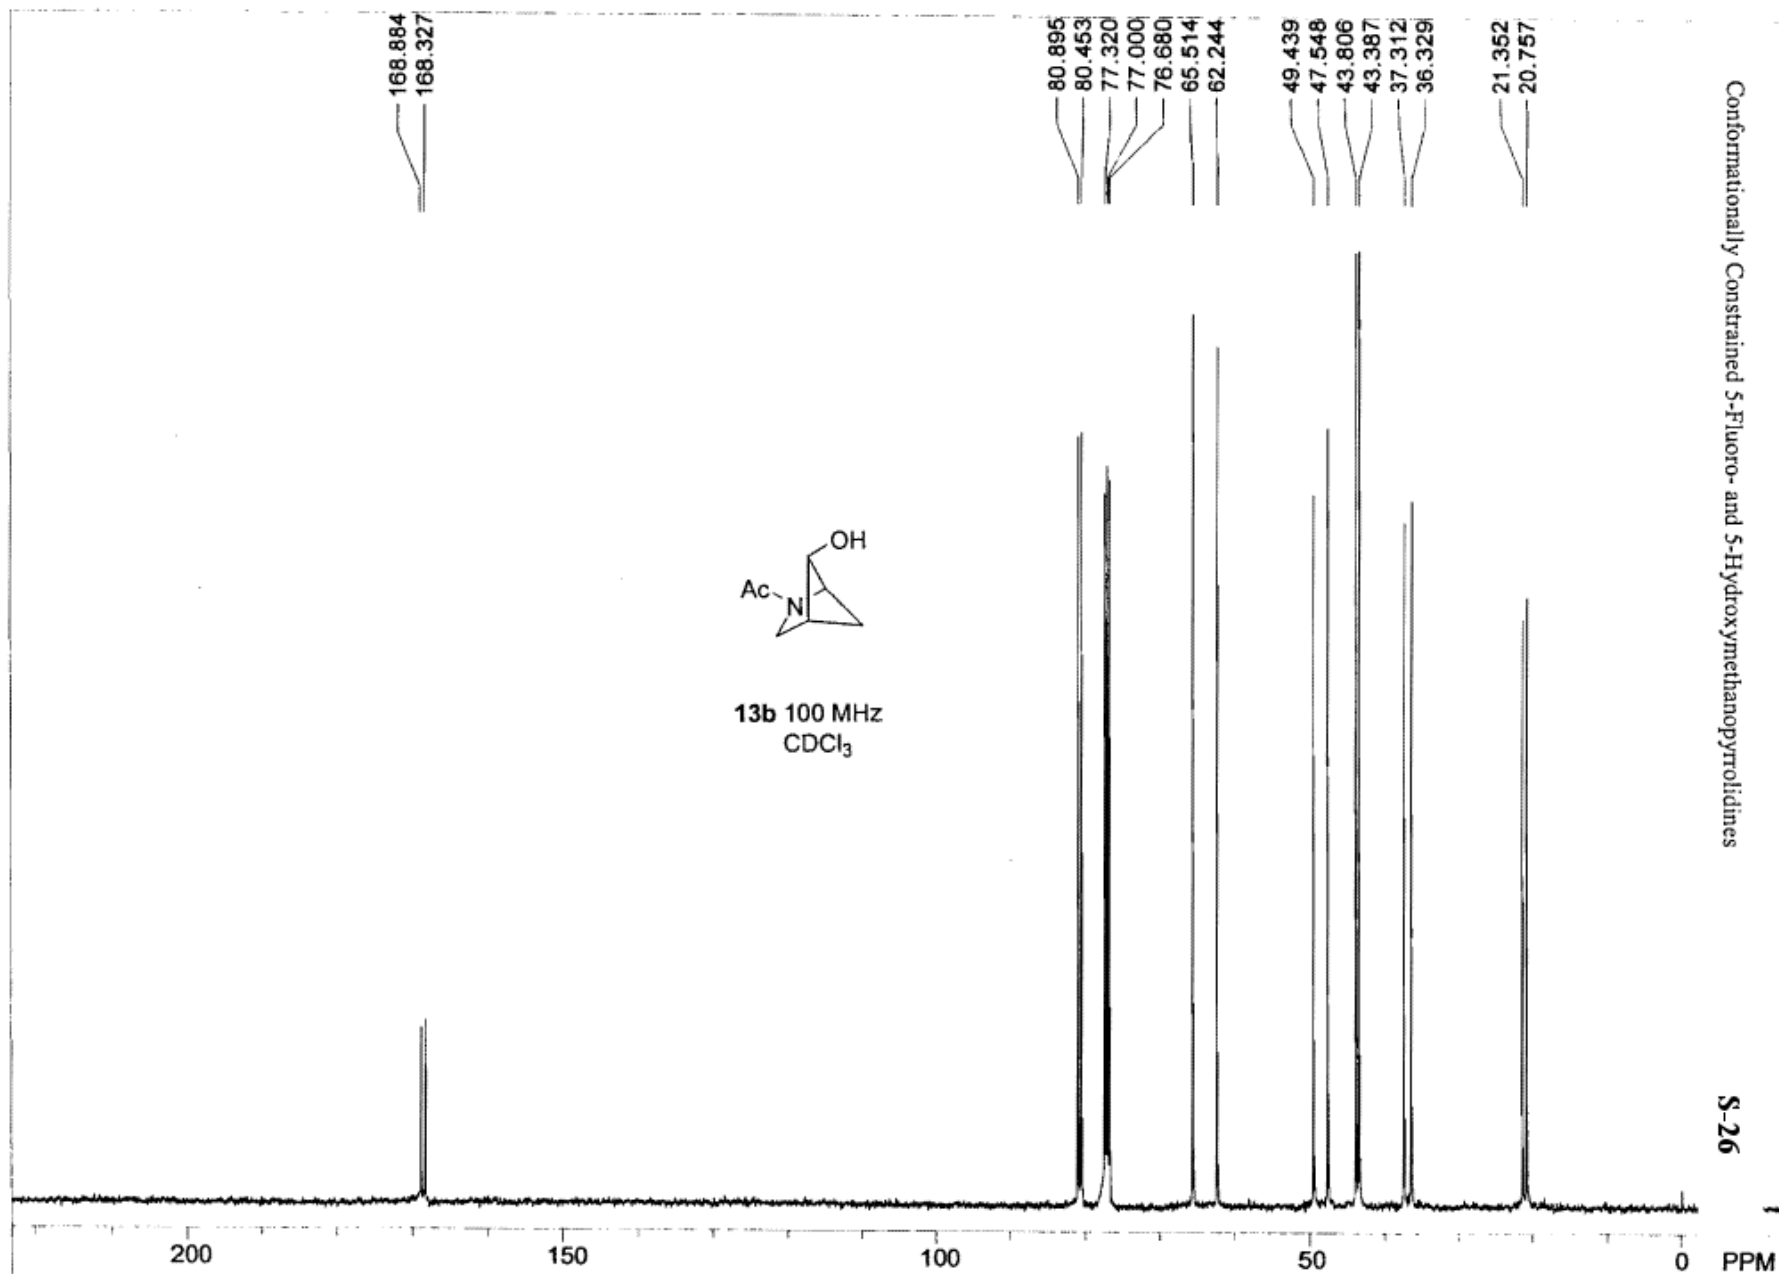

NAc[2.1.1]OH, carbon2HR.atm.

USER: temple - DATE: Jan 26 06:06:30 2008 EST (UT-5h) templ

F1: 100.613

F2: 1.000

SW1: 25126

OF1: 10015.7

PTS1d: 32768

EX:

PW: 5.7 us

PD: 2.0 sec

NA: 5048

LB: 3.0

Nuts - NAc[2.1.1] anti-OH--C--eram-825

7.375  
7.370  
7.362  
7.356  
7.353  
7.348  
7.340  
7.335  
7.330  
7.284  
7.273  
7.259  
7.255  
7.253  
7.241  
7.237  
7.232  
7.221  
7.218  
7.215  
7.174  
7.028  
7.009  
5.190  
5.108  
5.049  
4.881  
4.829  
4.758  
4.741  
3.632  
3.608  
3.585  
3.460  
3.439  
3.271

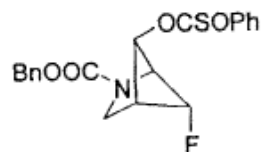

19 400 MHz  
CDCl<sub>3</sub>

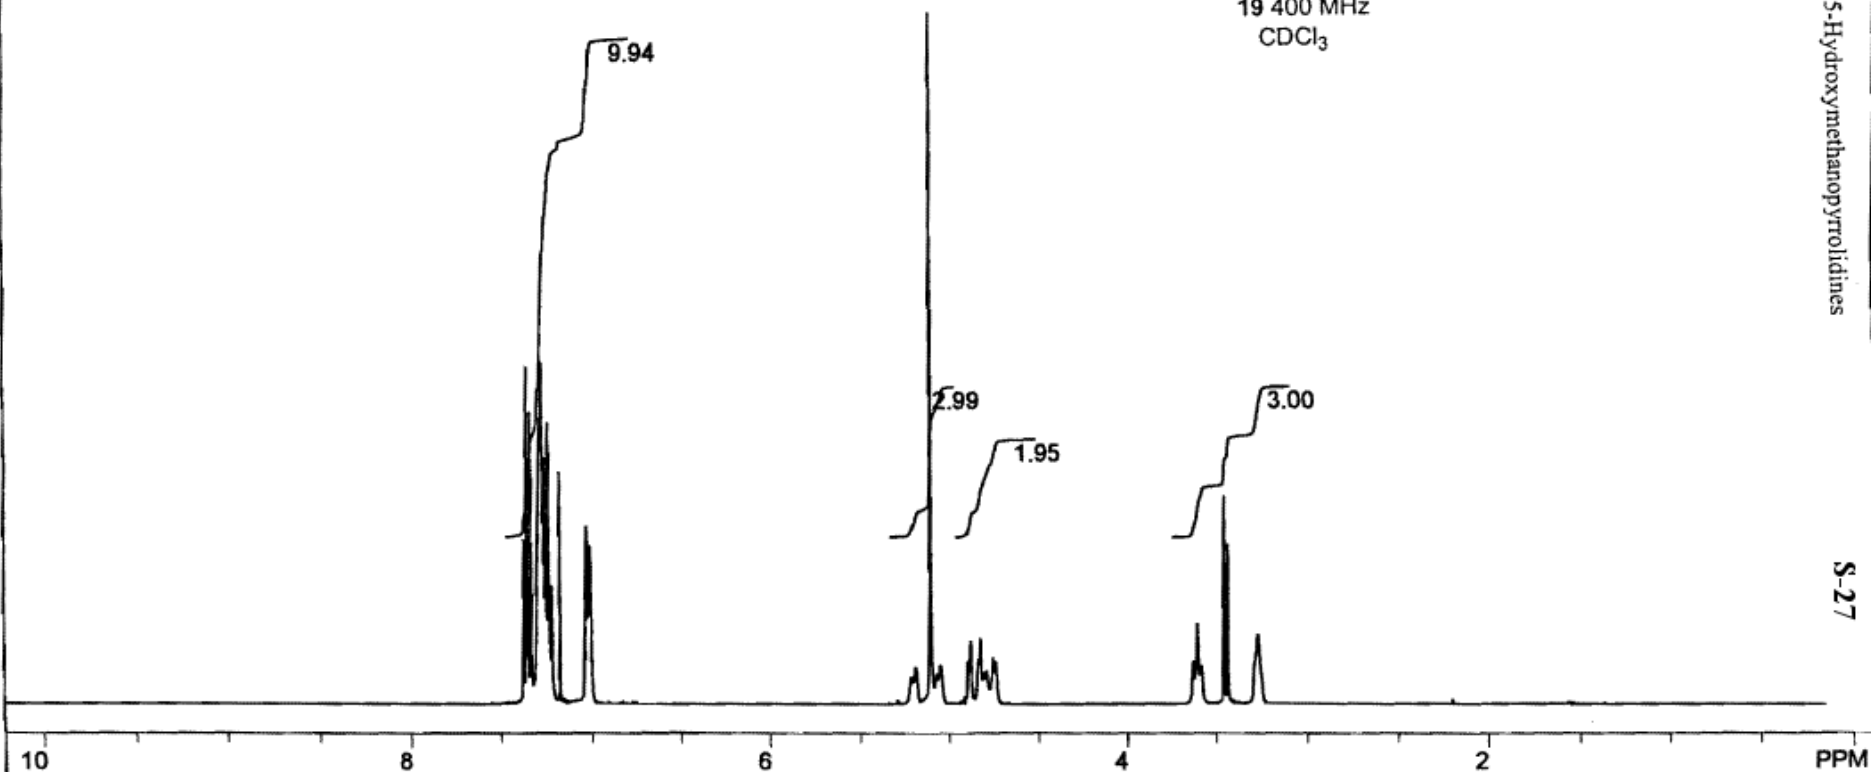

F-OSOPh spot2 TLC2. proton.atm.

USER: temple -- DATE: Nov 4 08:58:27 2004 EST (UT-5h) templ

|             |              |             |             |              |
|-------------|--------------|-------------|-------------|--------------|
| F1: 400.020 | F2: 1.000    | SW1: 8278   | OF1: 1965.7 | PTS1d: 32768 |
| EX:         | PW: 9.8 usec | PD: 1.0 sec | NA: 16      | LB: 0.1      |

WinNuts - \$FangYU.1

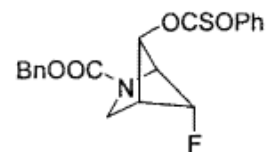

19 100 MHz  
CDCl<sub>3</sub>

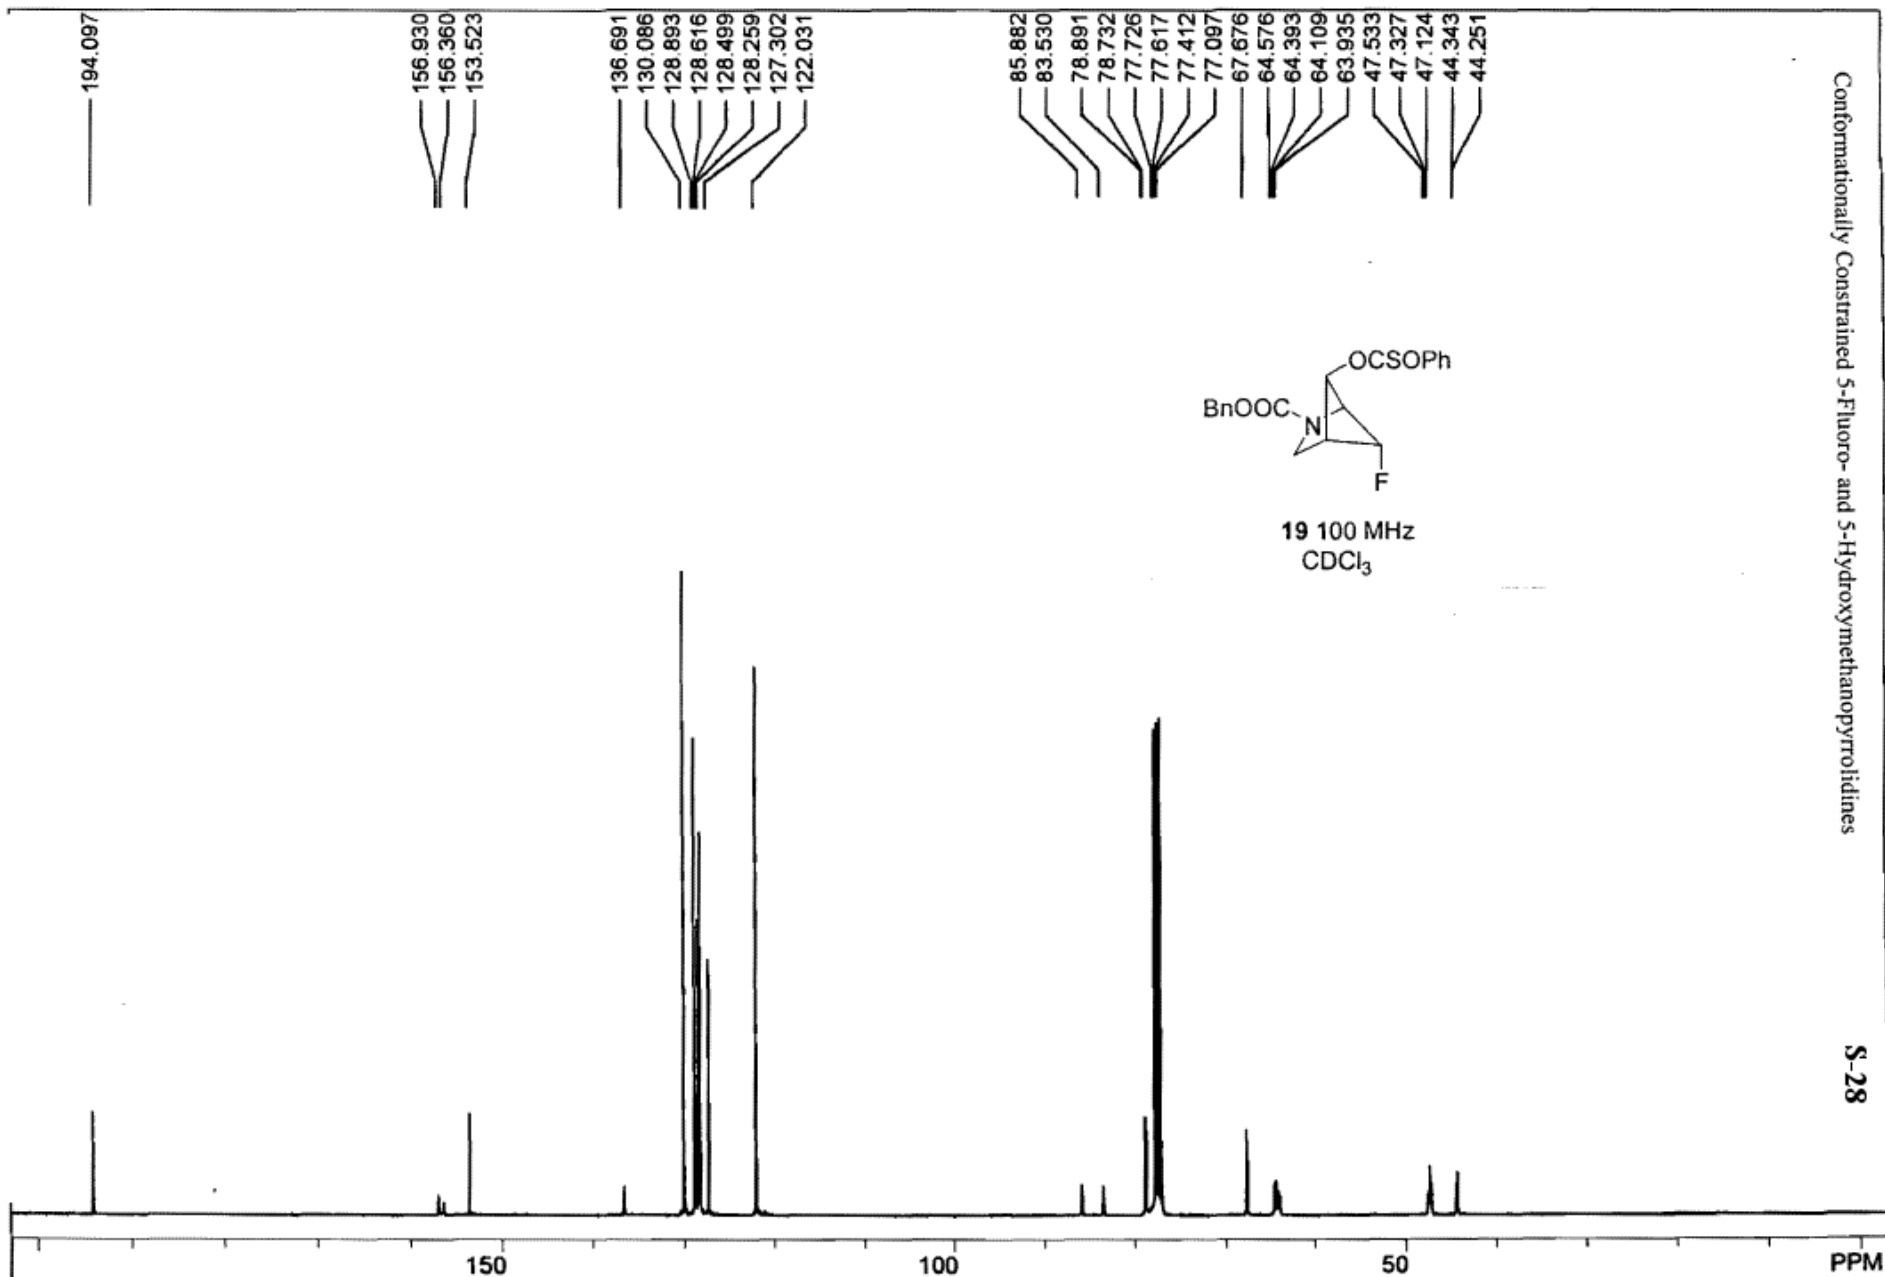

F-OSOPh Spot2, carbonOVNTE.atm.

USER: temple -- DATE: Nov 5 04:48:42 2004 EST (UT-5h) templ

|             |              |             |              |              |
|-------------|--------------|-------------|--------------|--------------|
| F1: 100.585 | F2: 1.000    | SW1: 25126  | OF1: 10057.2 | PTS1d: 32768 |
| EX:         | PW: 5.7 usec | PD: 2.0 sec | NA: 12000    | LB: 2.0      |

WinNuts - \$FangYU.1

Conformationally Constrained 5-Fluoro- and 5-Hydroxymethanopyrrolidines

S-29

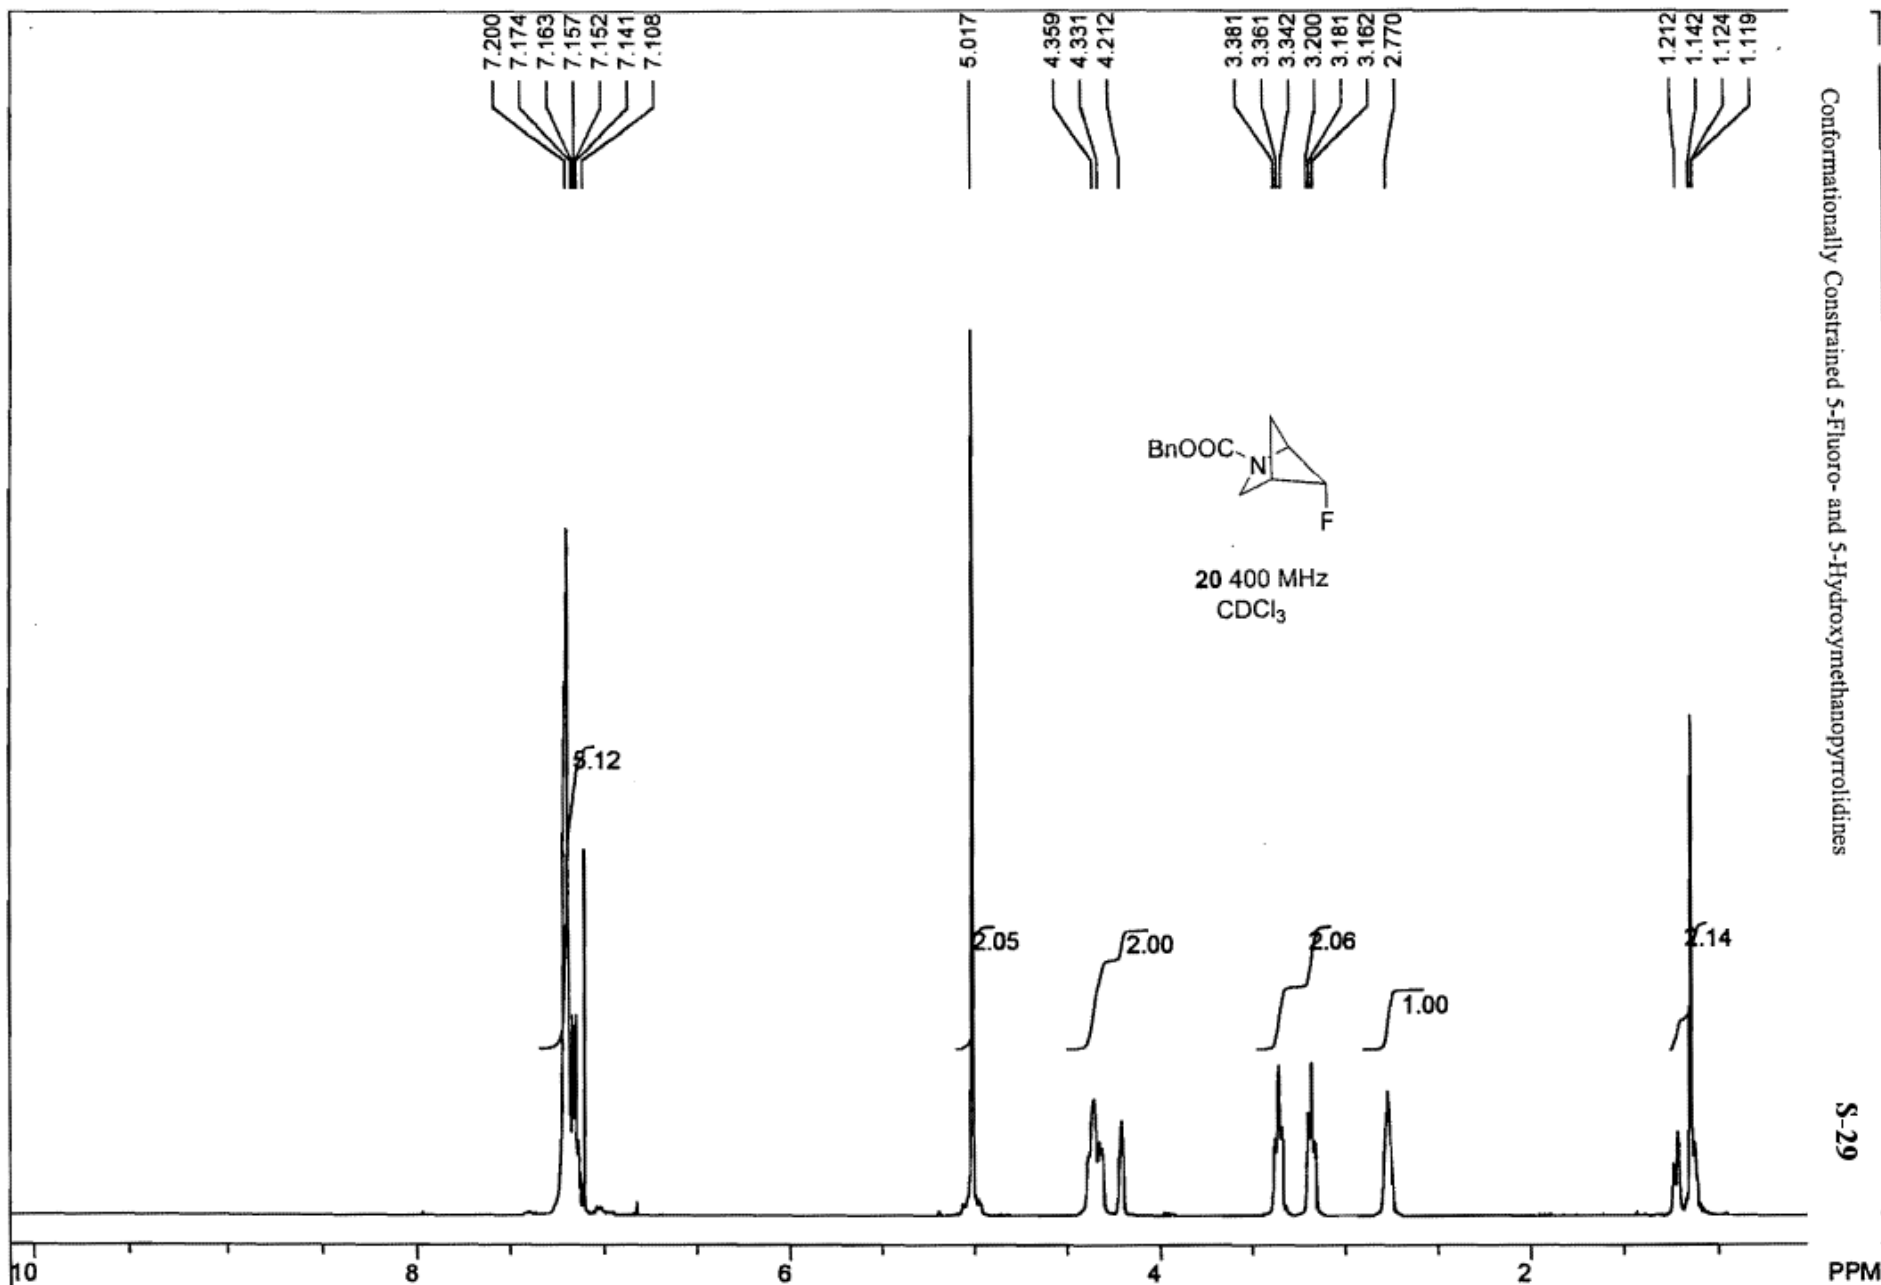

F TLC3-4, proton10MIN.atm

USER: temple -- DATE: Jan 4 13:51:10 2005 EST (UT-5h) templ

|             |              |             |             |              |
|-------------|--------------|-------------|-------------|--------------|
| F1: 400.020 | F2: 1.000    | SW1: 8278   | OF1: 1938.2 | PTS1d: 32768 |
| EX:         | PW: 9.8 usec | PD: 1.0 sec | NA: 128     | LB: 0.1      |

WinNuts - \$FangYU.1

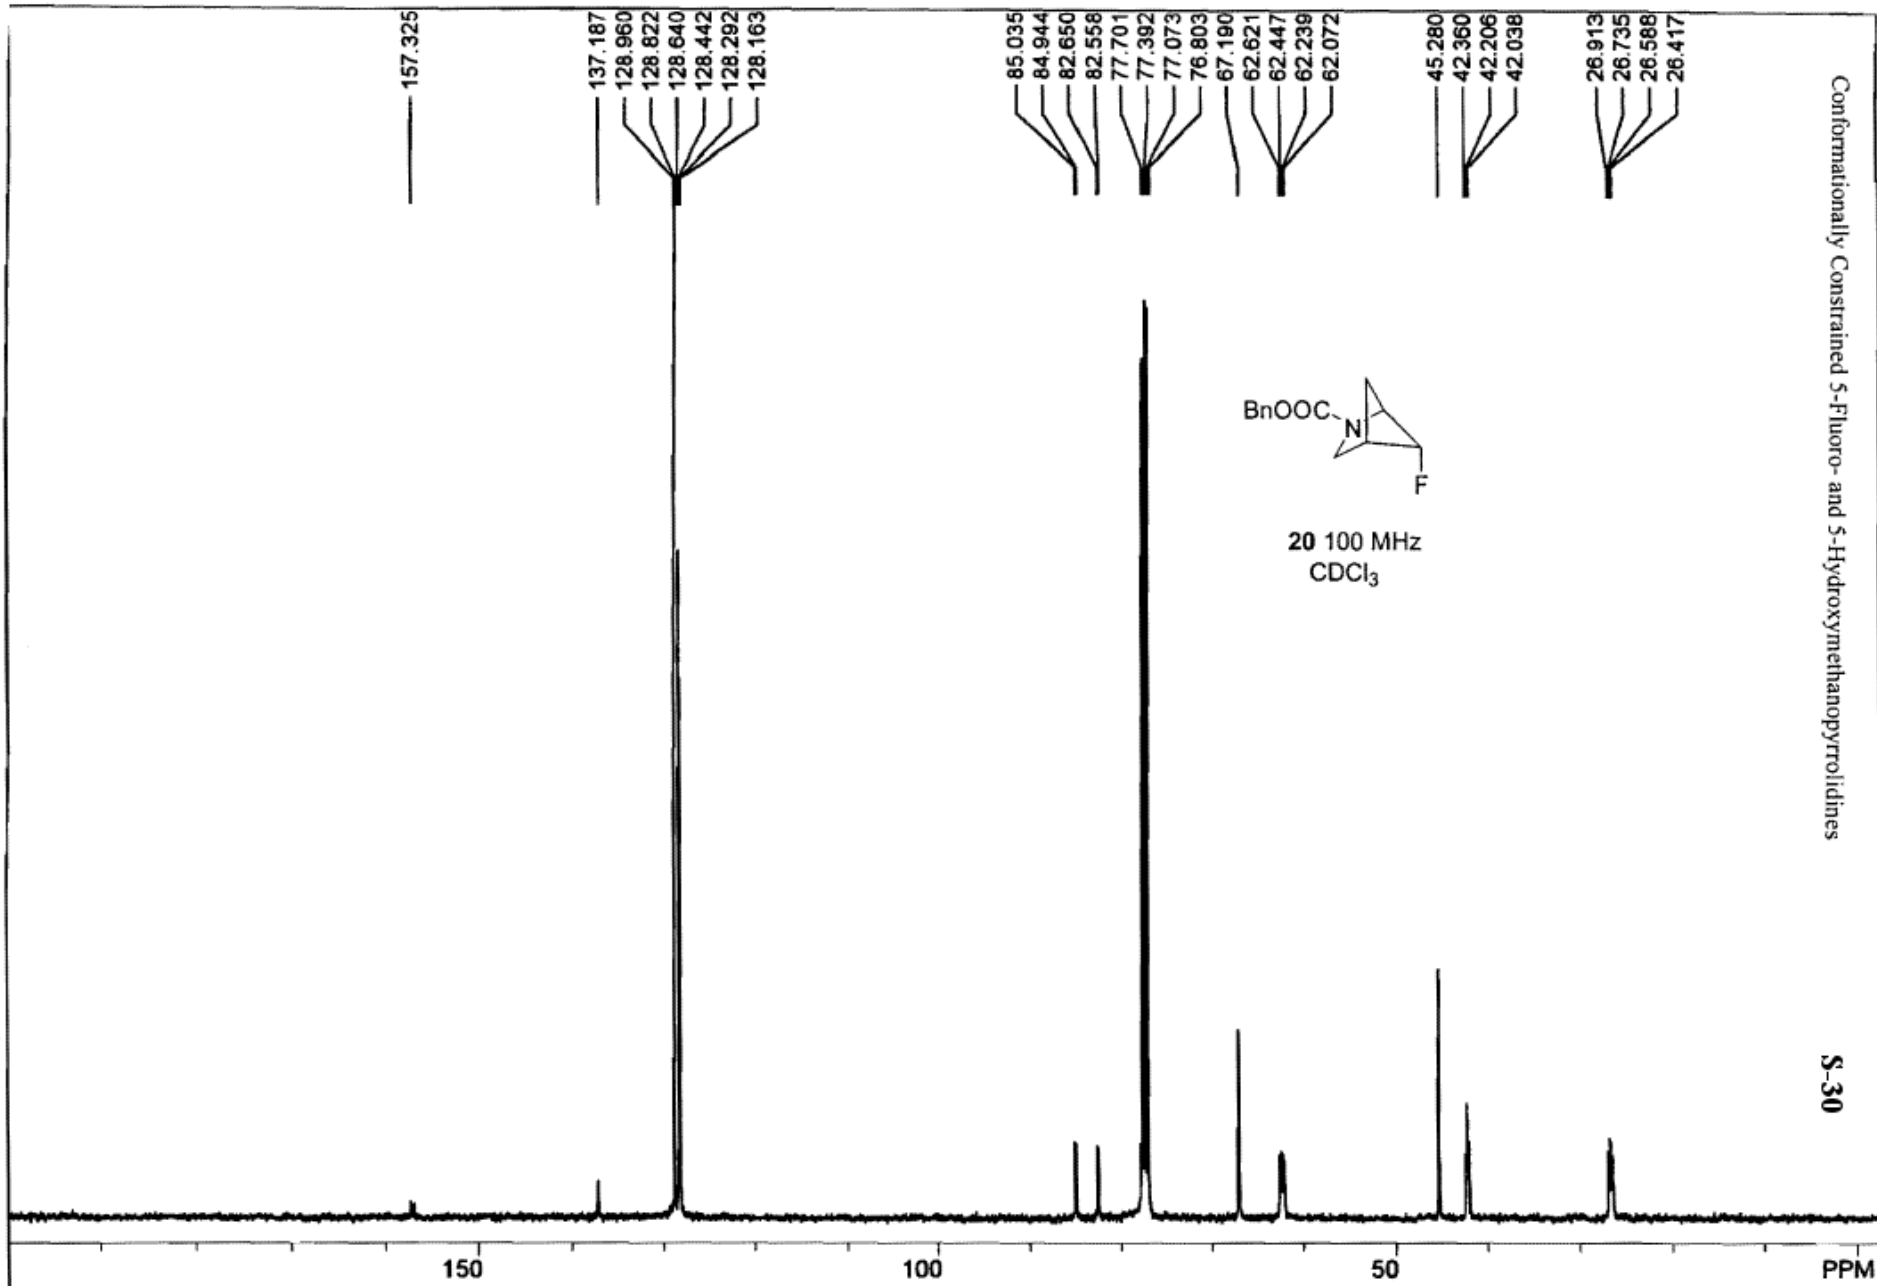

F TLC3-4, carbonOVNTE.atm

USER: temple -- DATE: Jan 4 05:25:45 2005 EST (UT-5h) templ

F1: 100.585

F2: 1.000

SW1: 25126

OF1: 10057.2

PTS1d: 32768

EX:

PW: 5.7 usec

PD: 2.0 sec

NA: 12000

LB: 2.0

WinNuts - \$FangYU.J

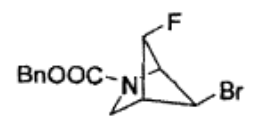

22

300 MHz, CDCl<sub>3</sub>

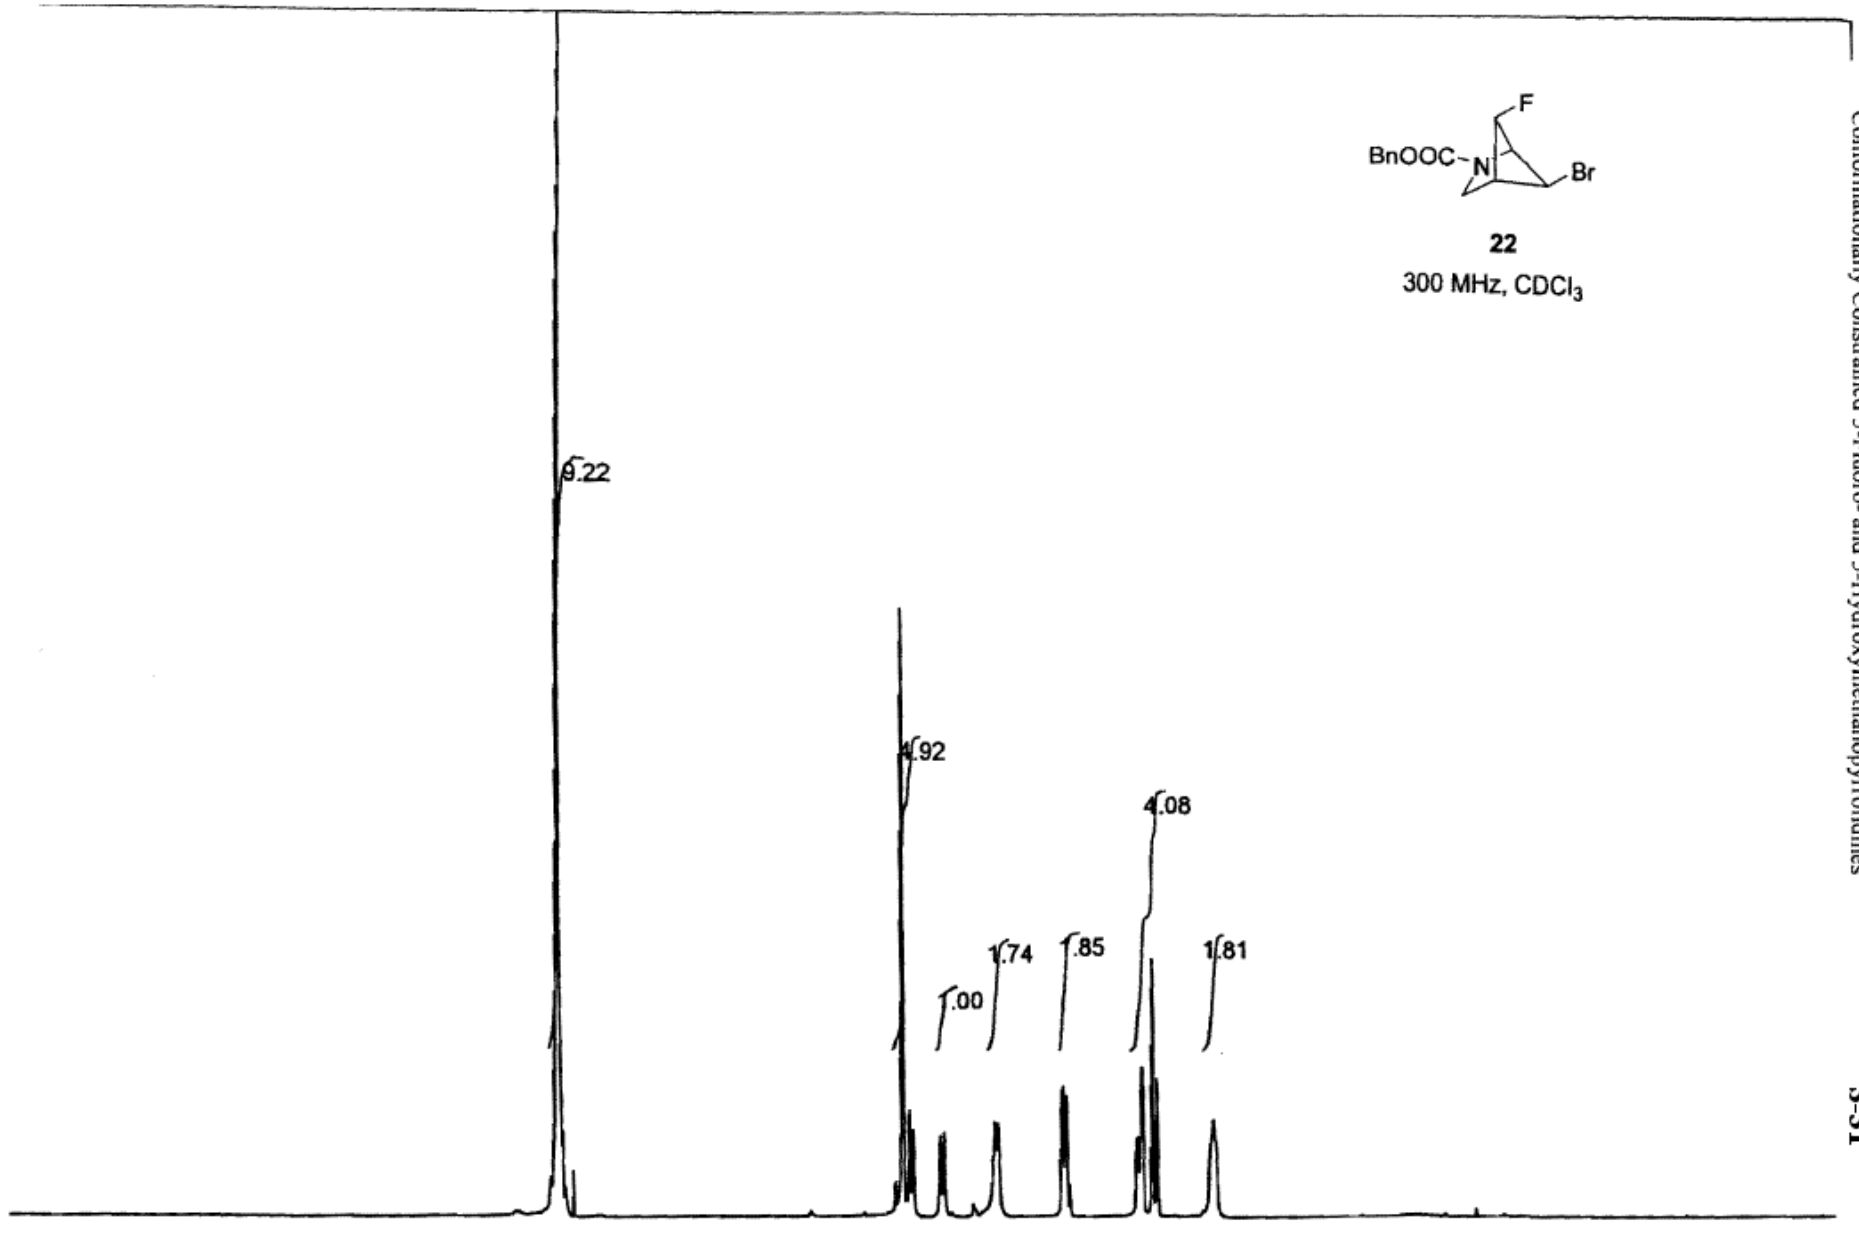

10 8 6 4 2 0 PPM

|                      |              |             |             |                           |                        |  |  |
|----------------------|--------------|-------------|-------------|---------------------------|------------------------|--|--|
| xpa/100033_09Mar2004 |              |             |             | USER: -- DATE: Mar 9 2004 |                        |  |  |
| F1: 299.986          | F2: 75.439   | SW1: 3600   | OF1: 1500.0 | PTS1d: 16384              |                        |  |  |
| X: s2pul             | PW: 4.4 usec | PD: 1.0 sec | NA: 8       | LB: 0.0                   | WinNuts - \$PROTON.fid |  |  |

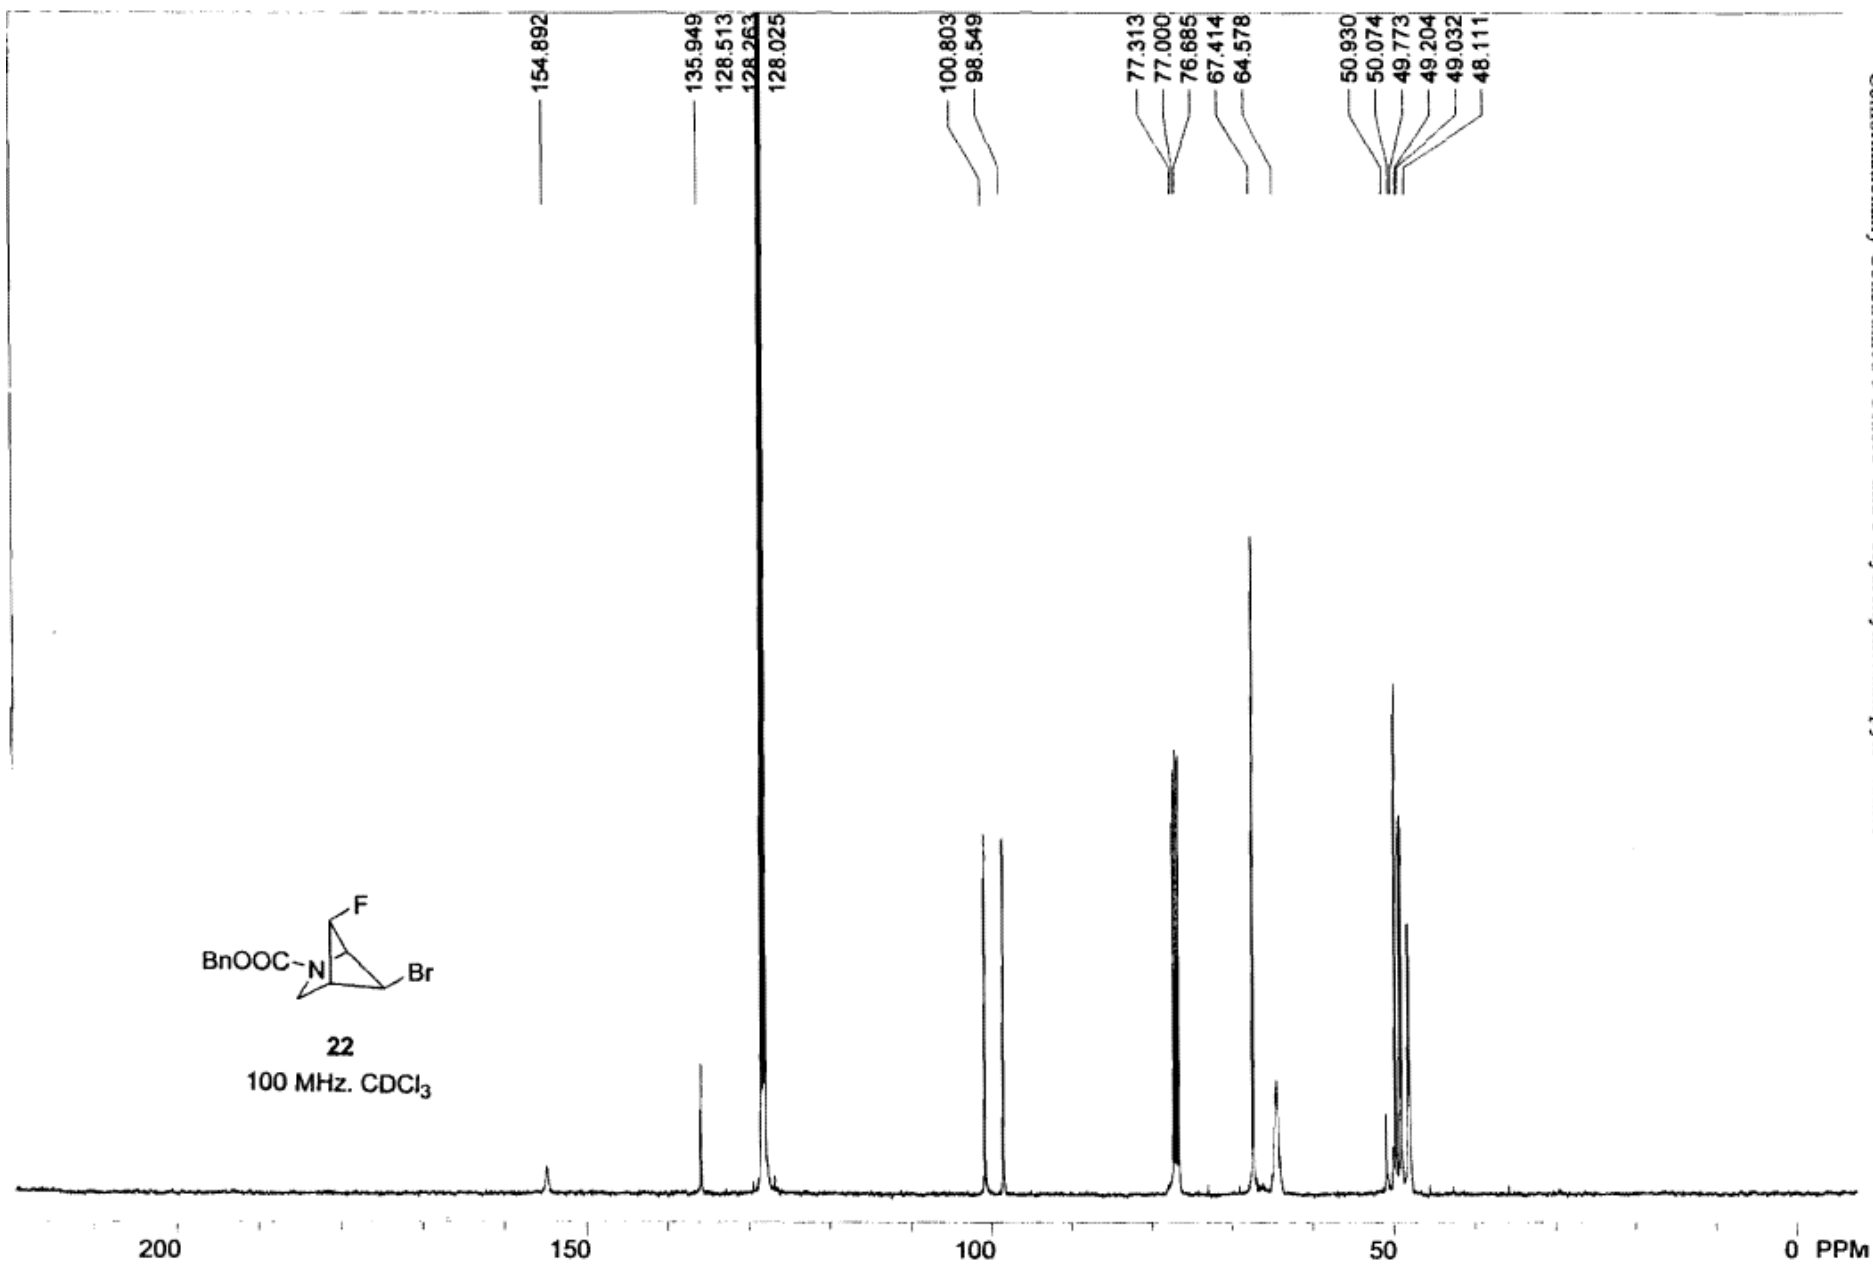

NZ[2.1.1]F, Br, carbon2HR.atm.

USER: temple -- DATE: Apr 4 00:04:27 2007 EDT (UT-4h) templ

F1: 100.628 F2: 1.000

SW1: 23148

OF1: 10575.6

PTS1d: 32768

EX: PW: 5.7 usec

PD: 2.0 sec

NA: 4048

LB: 3.0

WinNuts - NZ[2.1.1]F, Br--Carbon



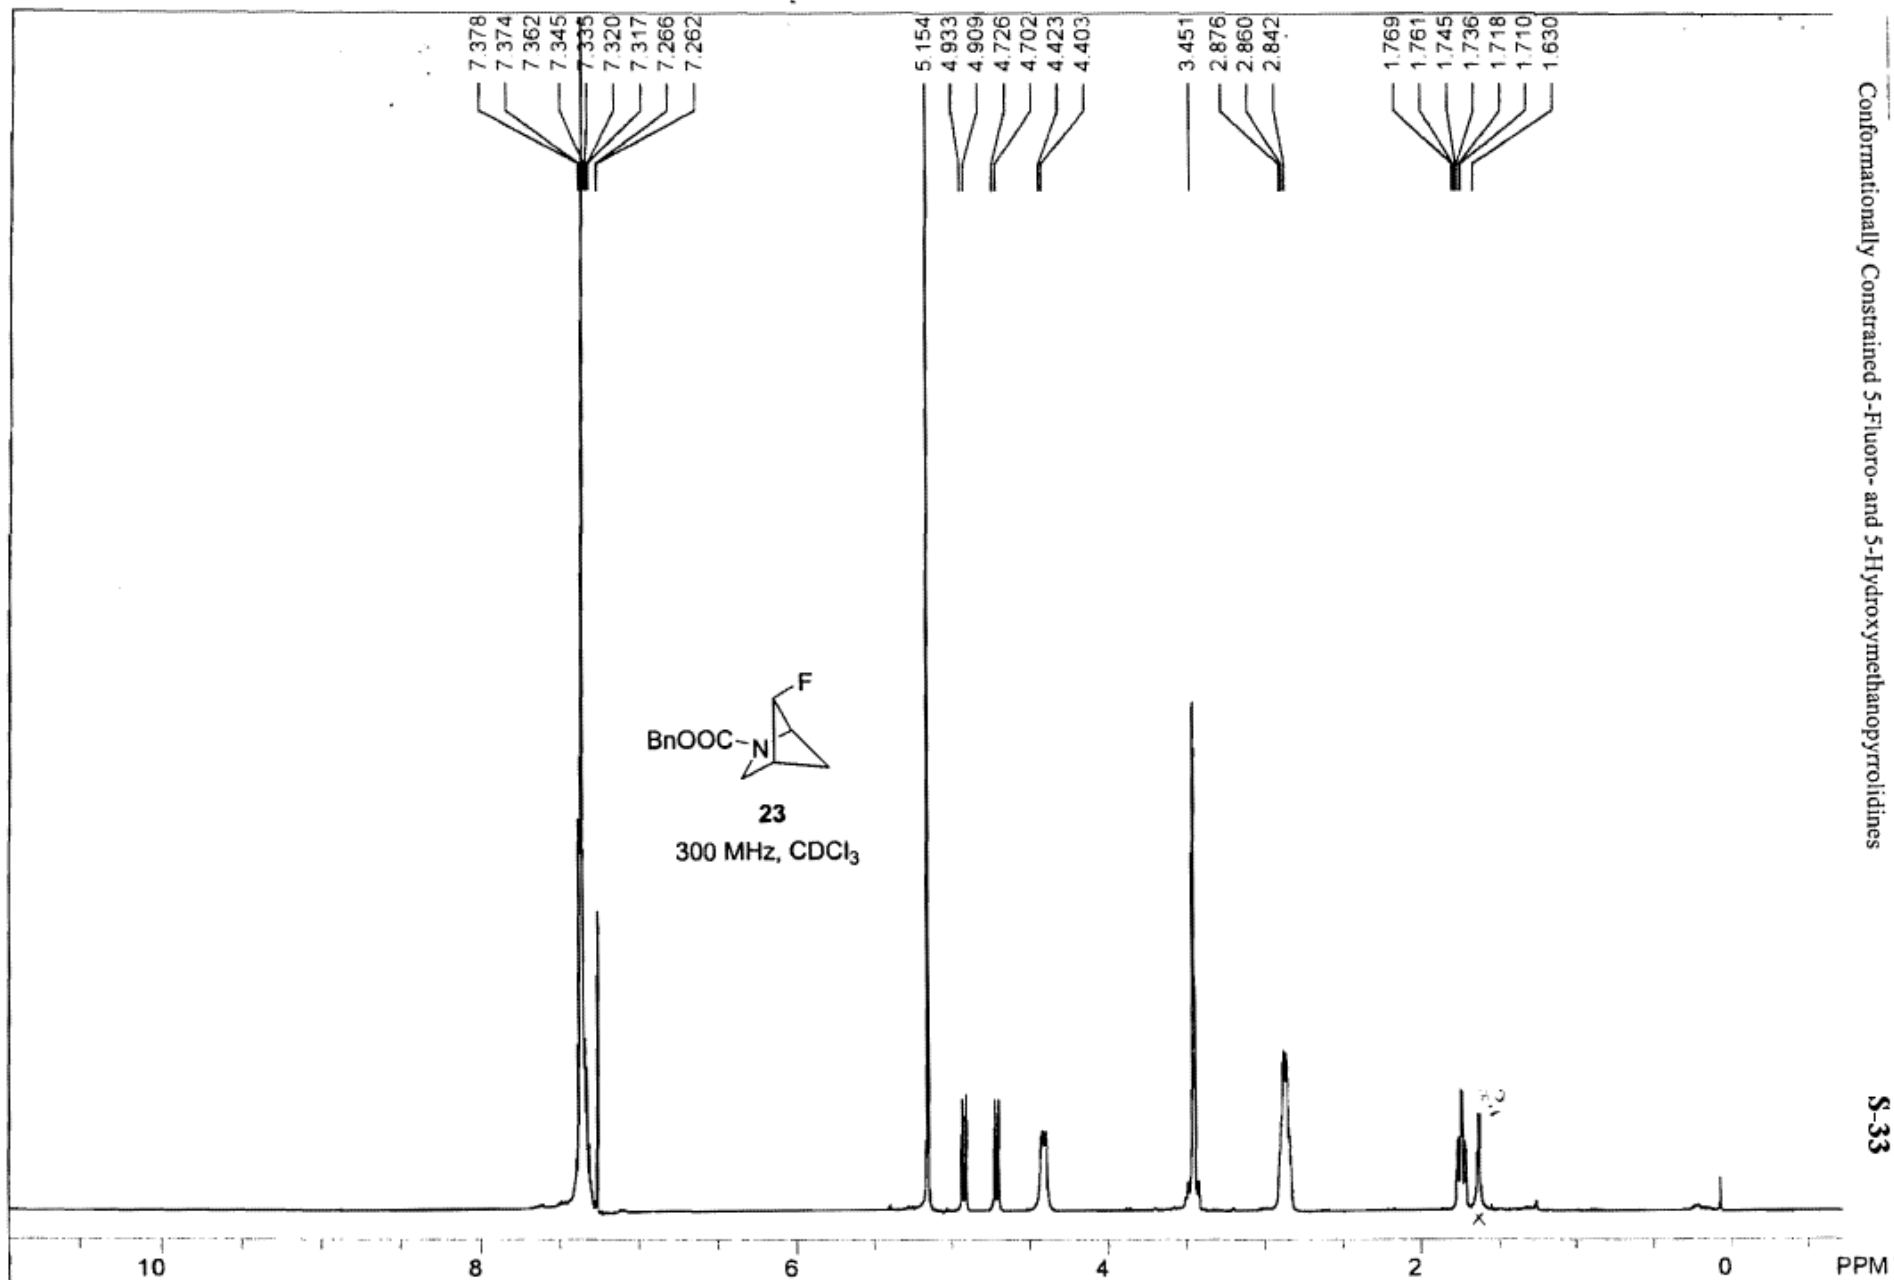

deepa/ncbzFpure\_20Nov2006

USER: -- DATE: Nov 20 2006

|             |              |             |             |              |
|-------------|--------------|-------------|-------------|--------------|
| F1: 300.018 | F2: 300.018  | SW1: 3600   | OF1: 1483.1 | PTS1d: 16384 |
| EX: s2pul   | PW: 4.0 usec | PD: 1.0 sec | NA: 8       | LB: 0.2      |

WinNuts - ncbzF211

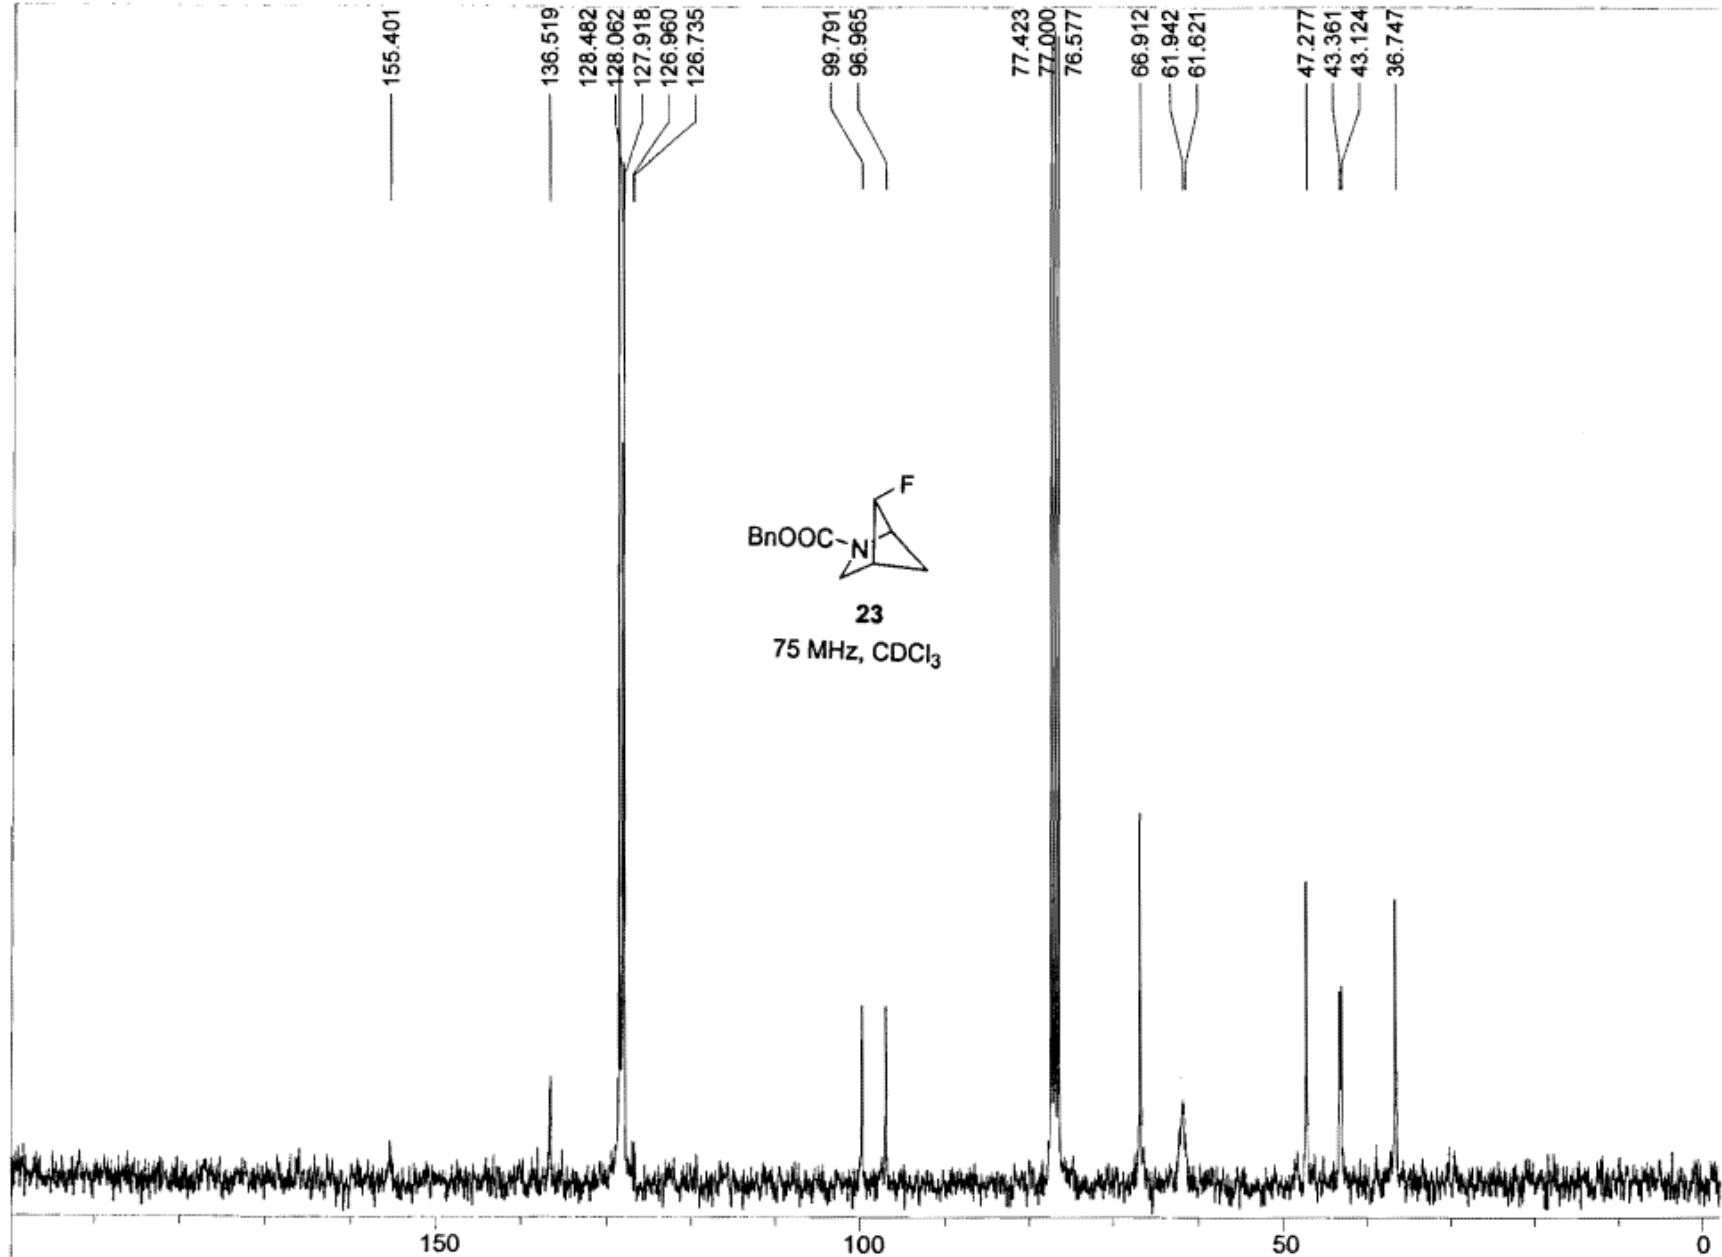

N-Benzyloxy-2-azabicyclo-5-anti-fluoro-[2.1.1]-hexane

USER: -- DATE: Nov 20 2003

|            |             |             |             |                      |
|------------|-------------|-------------|-------------|----------------------|
| F1: 75.438 | F2: 299.986 | SW1: 15842  | OF1: 7144.1 | PTS1d: 28754 , 65536 |
| EX: s2pul  | PW: 3.9 us  | PD: 1.0 sec | NA: 896     | LB: 3.6              |

Nuts - nutsproc

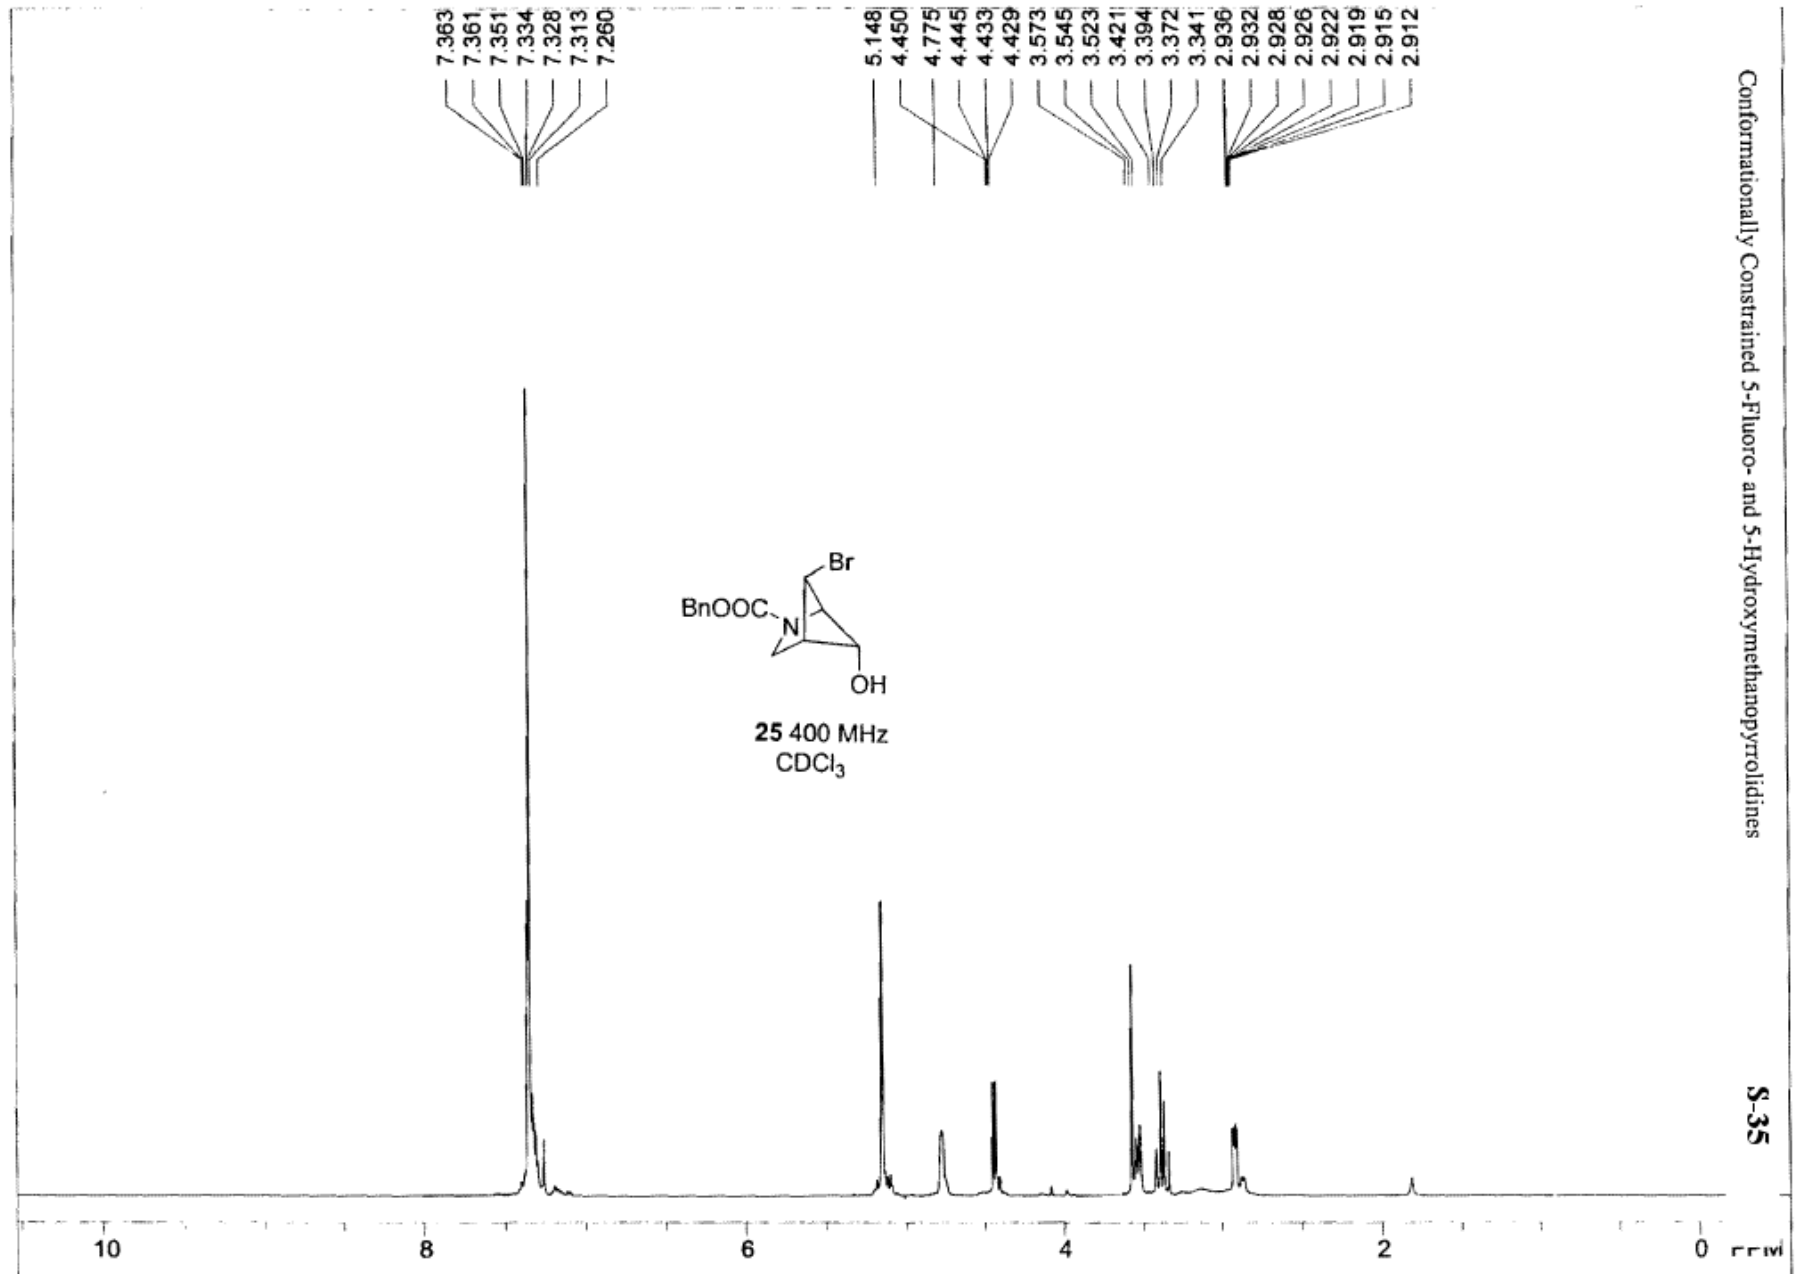

|                                         |            |             |                                                              |             |                                               |              |
|-----------------------------------------|------------|-------------|--------------------------------------------------------------|-------------|-----------------------------------------------|--------------|
| NZ[2.1.1] syn-OH, anti-Br, proton, atm, |            |             | USER: temple -- DATE: Jul 13 18:01:52 2008 EDT (UT-4h) templ |             |                                               |              |
| F1: 400.130                             | F2: 1.000  | SW1: 8013   |                                                              | OF1: 2004.8 |                                               | PTS1d: 32768 |
| EX:                                     | PW: 9.8 us | PD: 1.0 sec | NA: 16                                                       | LB: 0.1     | Nuts - NZ[2.1.1]syn-OH, anti-Br--H--eram-1380 |              |

Conformationally Constrained 5-Fluoro- and 5-Hydroxymethanopyrrolidines

S-36

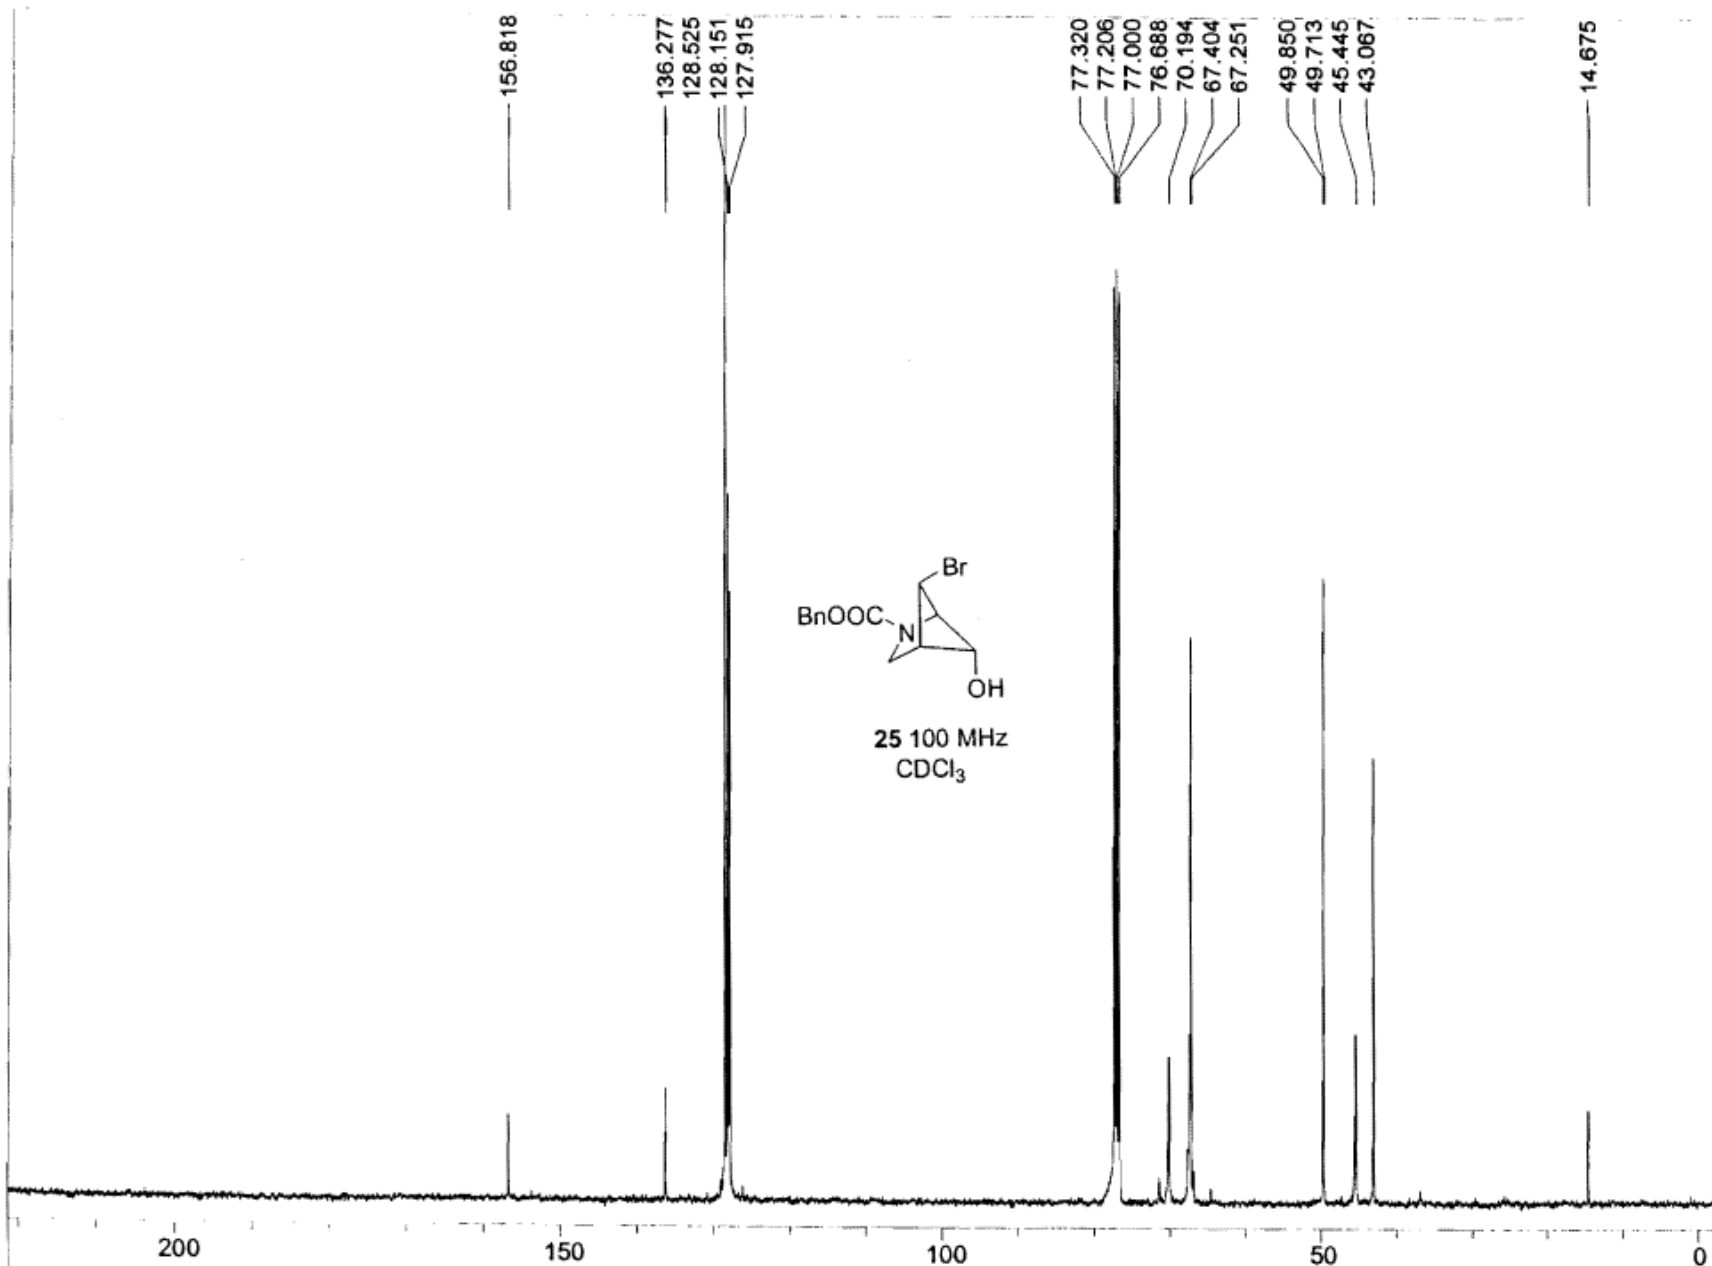

|                                             |            |             |          |                                                             |                                              |              |  |
|---------------------------------------------|------------|-------------|----------|-------------------------------------------------------------|----------------------------------------------|--------------|--|
| NZ[2.1.1]syn-OH, anti-Br, carbonOVNTE, atm. |            |             |          | USER: temple -- DATE: Mar 4 06:42:08 2008 EST (UT-5h) templ |                                              |              |  |
| F1: 100.613                                 | F2: 1.000  | SW1: 25126  |          | OF1: 10019.6                                                |                                              | PTS1d: 32768 |  |
| EX:                                         | PW: 5.7 us | PD: 2.0 sec | NA: 8000 | LB: 3.0                                                     | Nuts - NZ[2.1.1]syn-OH, anti-Br--C--eram-962 |              |  |

Conformationally Constrained 5-Fluoro- and 5-Hydroxymethanopyrrolidines

S-37

7.365  
7.357  
7.353  
7.347  
7.331  
7.323  
7.310  
7.297  
7.262  
7.260  
5.201  
5.171  
5.148  
5.109  
5.065  
5.035  
4.673  
4.653  
4.650  
4.387  
4.384  
4.370  
4.367  
3.581  
3.559  
3.537  
3.515  
3.344  
3.320  
3.298  
2.877  
1.709  
1.708  
0.902  
0.891  
0.853  
0.832  
0.802  
0.084  
0.078  
0.068  
0.040

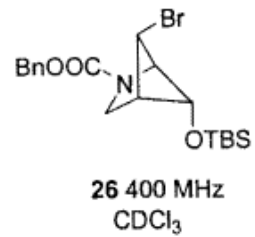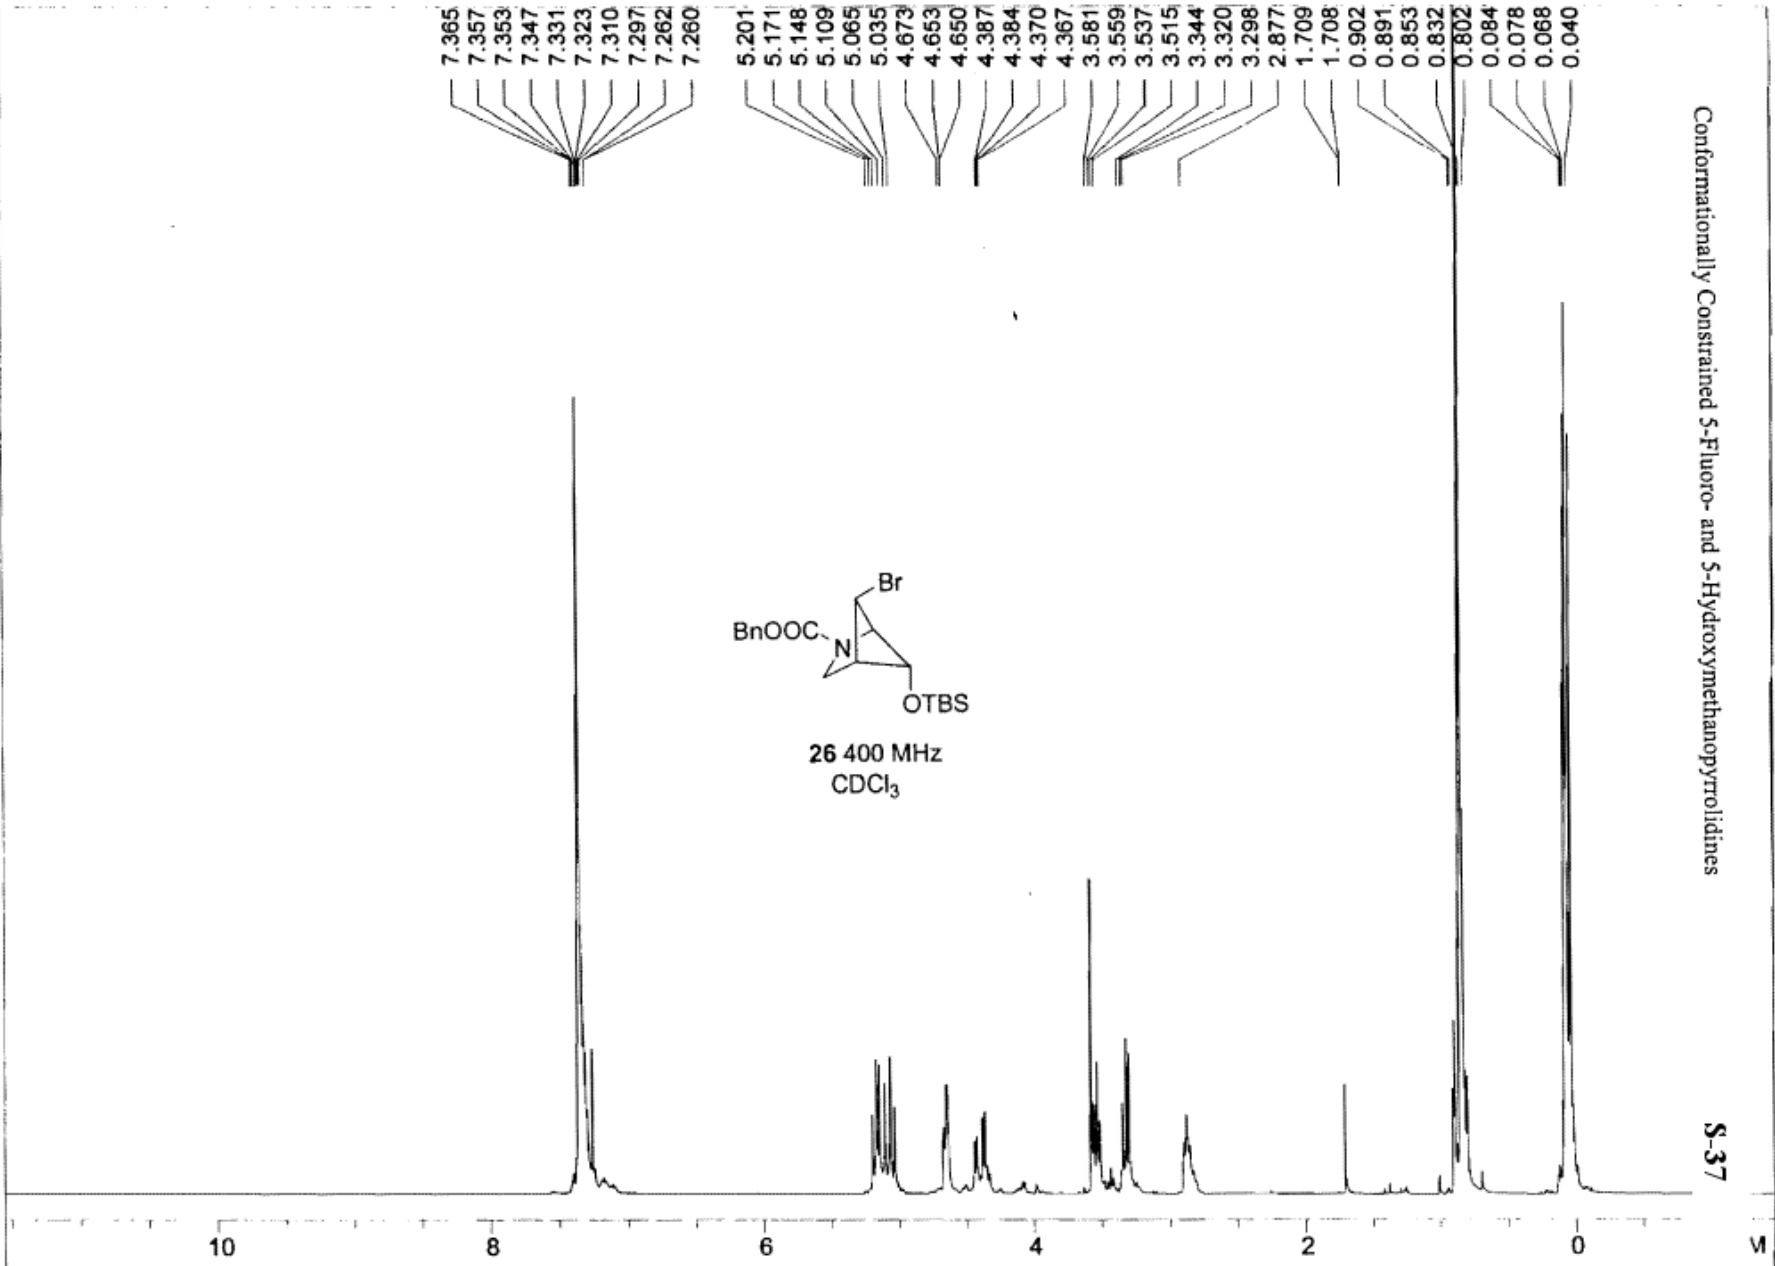

|                                         |           |            |             |                                                              |         |                                                 |  |
|-----------------------------------------|-----------|------------|-------------|--------------------------------------------------------------|---------|-------------------------------------------------|--|
| NZ[2.1.1]anti-Br, syn-OTBS, proton.atm. |           |            |             | USER: temple -- DATE: Apr 16 23:24:29 2008 EDT (UT-4h) templ |         |                                                 |  |
| F1: 400.130                             | F2: 1.000 | SW1: 8013  |             | OF1: 2004.6                                                  |         | PTS1d: 32768                                    |  |
| EX:                                     |           | PW: 9.8 us | PD: 1.0 sec | NA: 16                                                       | LB: 0.1 | Nuts - NZ[2.1.1]syn-OTBS, anti-Br--H--eram-1072 |  |

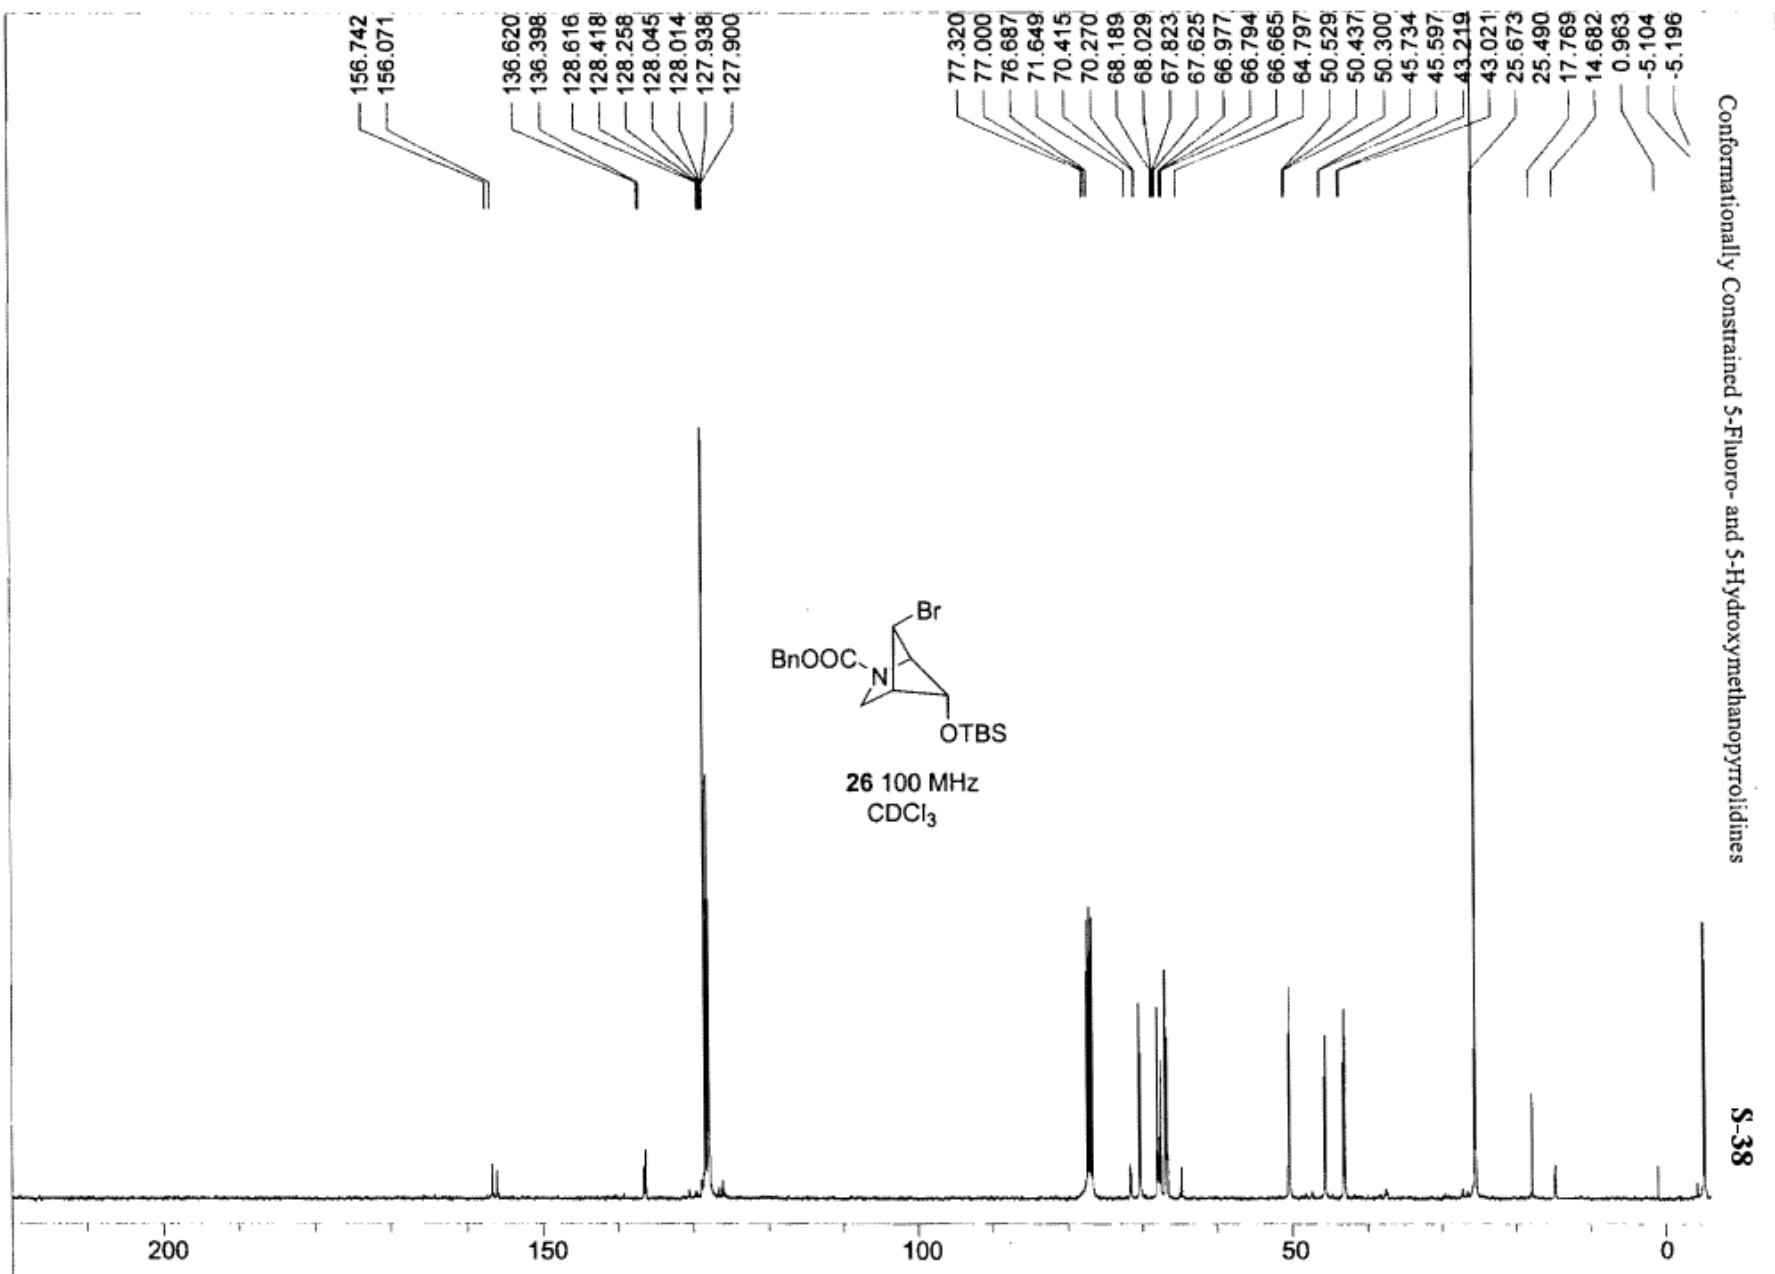

Conformationally Constrained 5-Fluoro- and 5-Hydroxymethanopyrrolidines

|                                               |           |            |             |                                                              |         |                                                 |  |
|-----------------------------------------------|-----------|------------|-------------|--------------------------------------------------------------|---------|-------------------------------------------------|--|
| Ncbz[2.1.1]syn-OTBS, anti-Br, carbon1 HR atm. |           |            |             | USER: temple -- DATE: Jun 28 23:07:43 2008 EDT (UT-4h) templ |         |                                                 |  |
| F1: 100.613                                   | F2: 1.000 | SWI: 25126 |             | OF1: 10017.3                                                 |         | PTS1d: 32768                                    |  |
| EX:                                           |           | PW: 5.7 us | PD: 2.0 sec | NA: 3200                                                     | LB: 3.0 | Nuts - NZ[2.1.1]syn-OTBS, anti-Br--C--eram-1320 |  |

Conformationally Constrained 5-Fluoro- and 5-Hydroxymethanopyrrolidines

S-39

7.390  
7.368  
7.365  
7.352  
7.348  
7.337  
7.330  
7.323  
7.316  
7.310  
7.305  
7.294  
7.278  
7.260  
5.202  
5.171  
5.144  
5.114  
5.069  
5.038  
4.303  
4.286  
4.243  
4.226  
3.698  
3.691  
3.684  
3.679  
3.478  
3.457  
3.436  
3.228  
3.208  
3.200  
3.179  
2.642  
2.625  
1.715  
1.279  
1.257  
1.254  
1.205  
1.185  
1.165  
0.891  
0.841  
0.820  
0.790  
0.043  
0.031  
0.013  
0.005

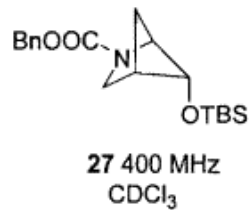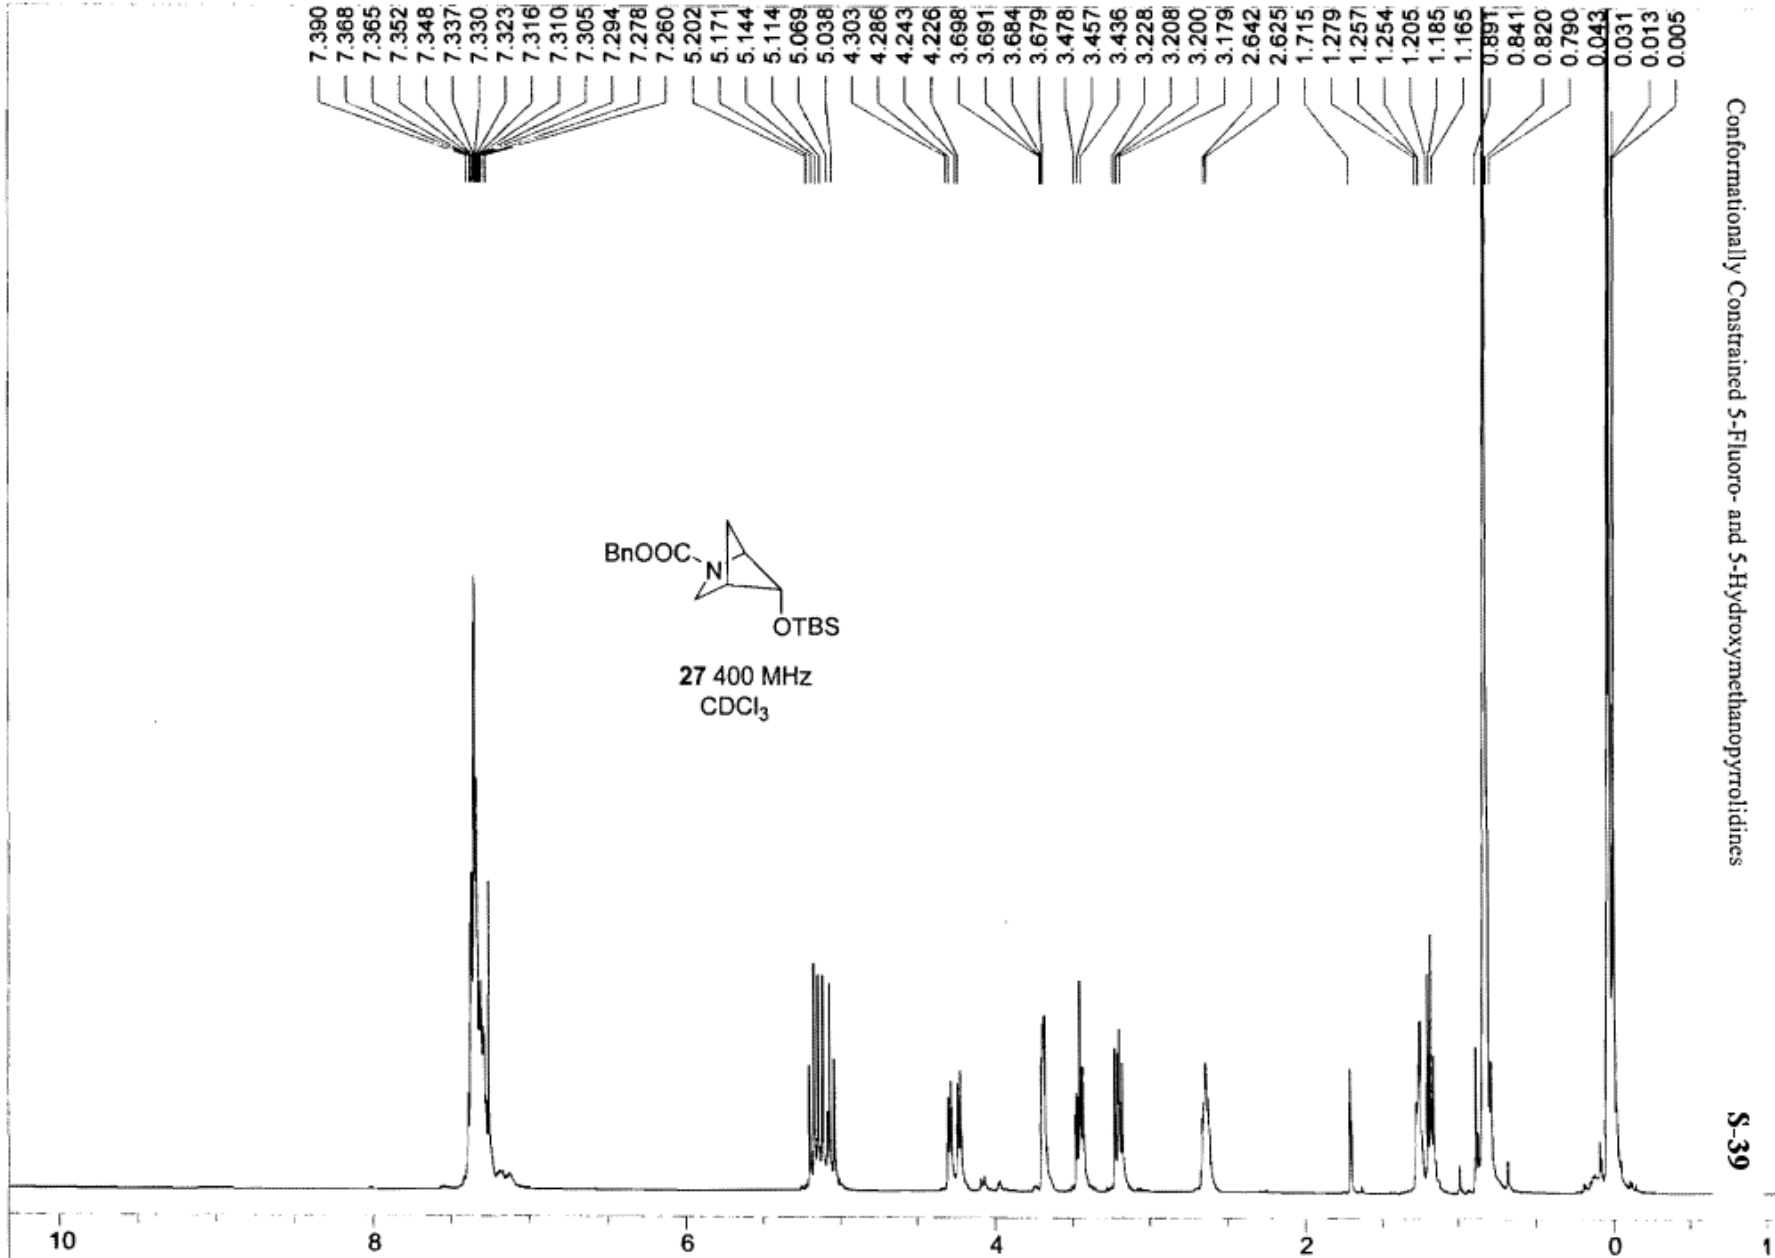

|                                |           |            |             |                                                              |         |                                      |  |
|--------------------------------|-----------|------------|-------------|--------------------------------------------------------------|---------|--------------------------------------|--|
| NZ[2.1.1]syn-OTBS, proton.atm. |           |            |             | USER: temple -- DATE: Apr 16 22:54:39 2008 EDT (UT-4h) templ |         |                                      |  |
| F1: 400.130                    | F2: 1.000 | SW1: 8013  |             | OF1: 2004.0                                                  |         | PTS1d: 32768                         |  |
| EX:                            |           | PW: 9.8 us | PD: 1.0 sec | NA: 16                                                       | LB: 0.1 | Nuts - NZ[2.1.1]syn-OTBS-H-eram-1071 |  |

Conformationally Constrained 5-Fluoro- and 5-Hydroxymethanopyrrolidines

S-40

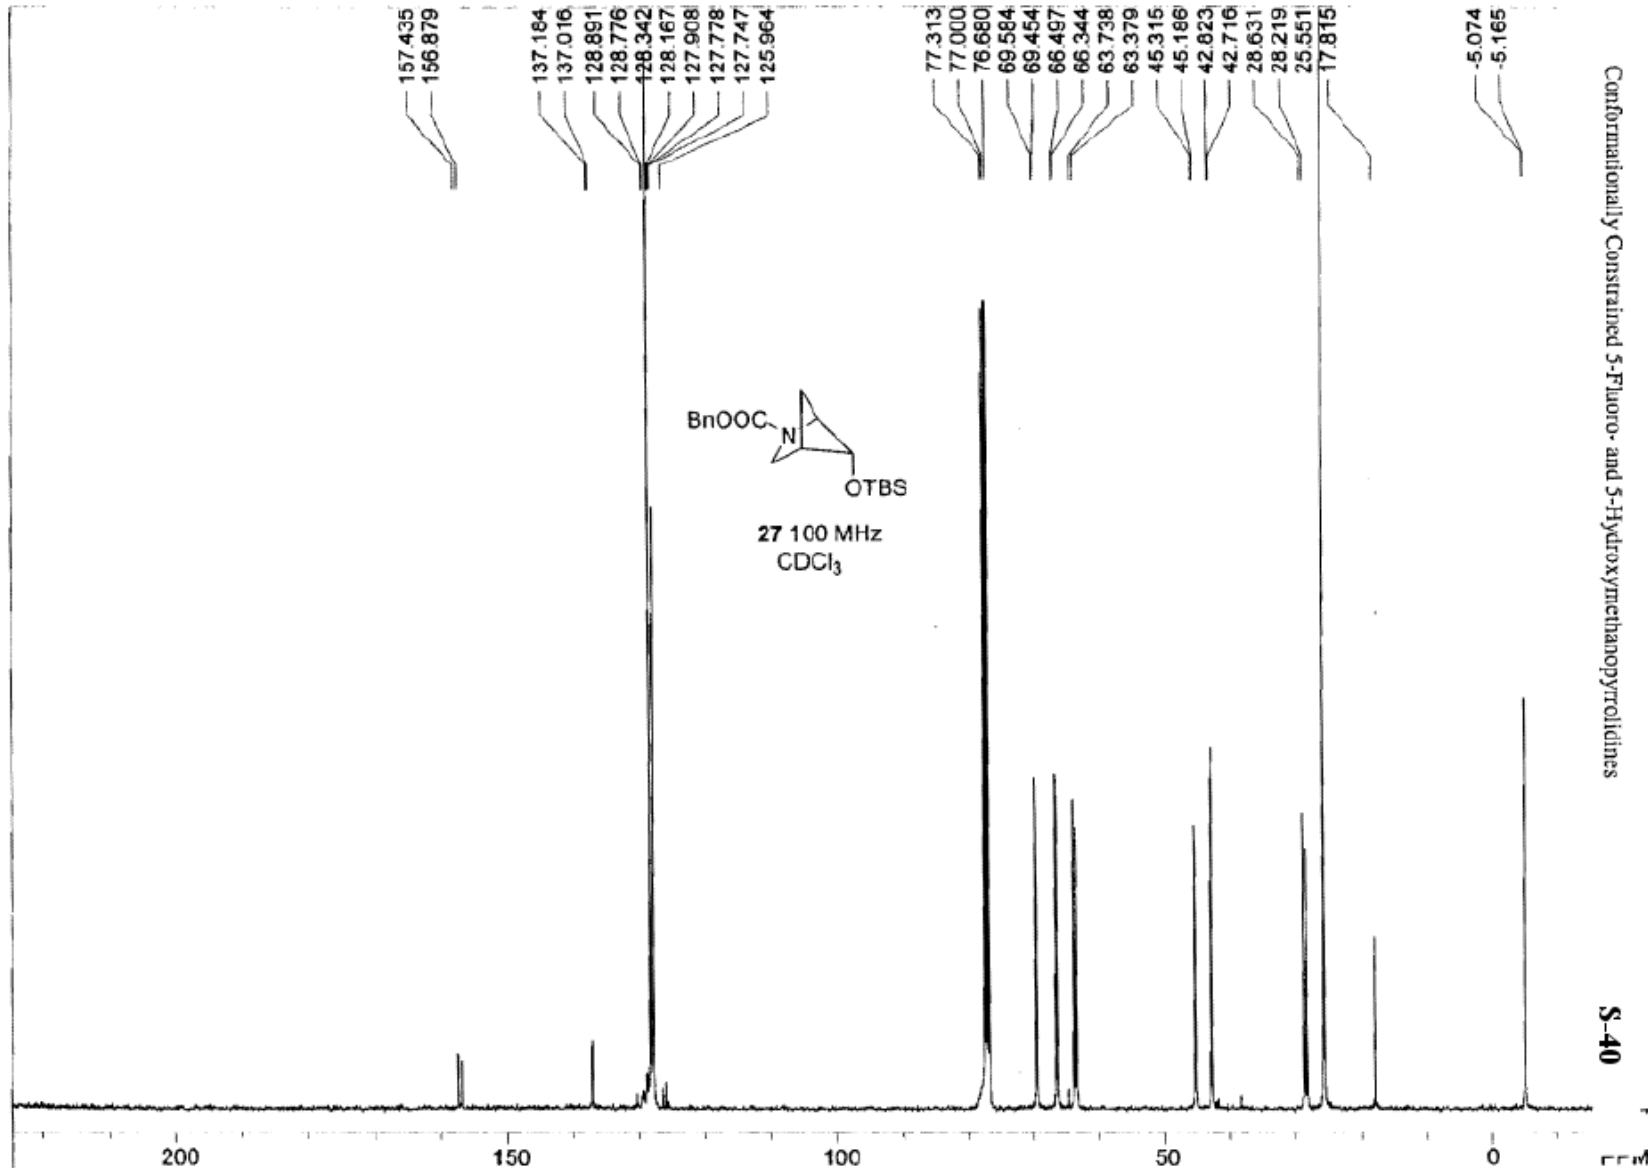

|                                      |           |            |             |                                                              |         |                                        |  |
|--------------------------------------|-----------|------------|-------------|--------------------------------------------------------------|---------|----------------------------------------|--|
| NCbz[2.1.1]syn-OTBS, carbonOVNTE.all |           |            |             | USER: temple -- DATE: Jun 29 06:46:43 2008 EDT (UT-4h) temp1 |         |                                        |  |
| F1: 100.613                          | F2: 1.000 | SW1: 25126 |             | OF1: 10019.6                                                 |         | PTS[d: 32768                           |  |
| EX:                                  |           | PW: 5.7 us | PD: 2.0 sec | NA: 8000                                                     | LB: 3.0 | Nuts - NZ[2.1.1]syn-OTBS--C--eram-1322 |  |



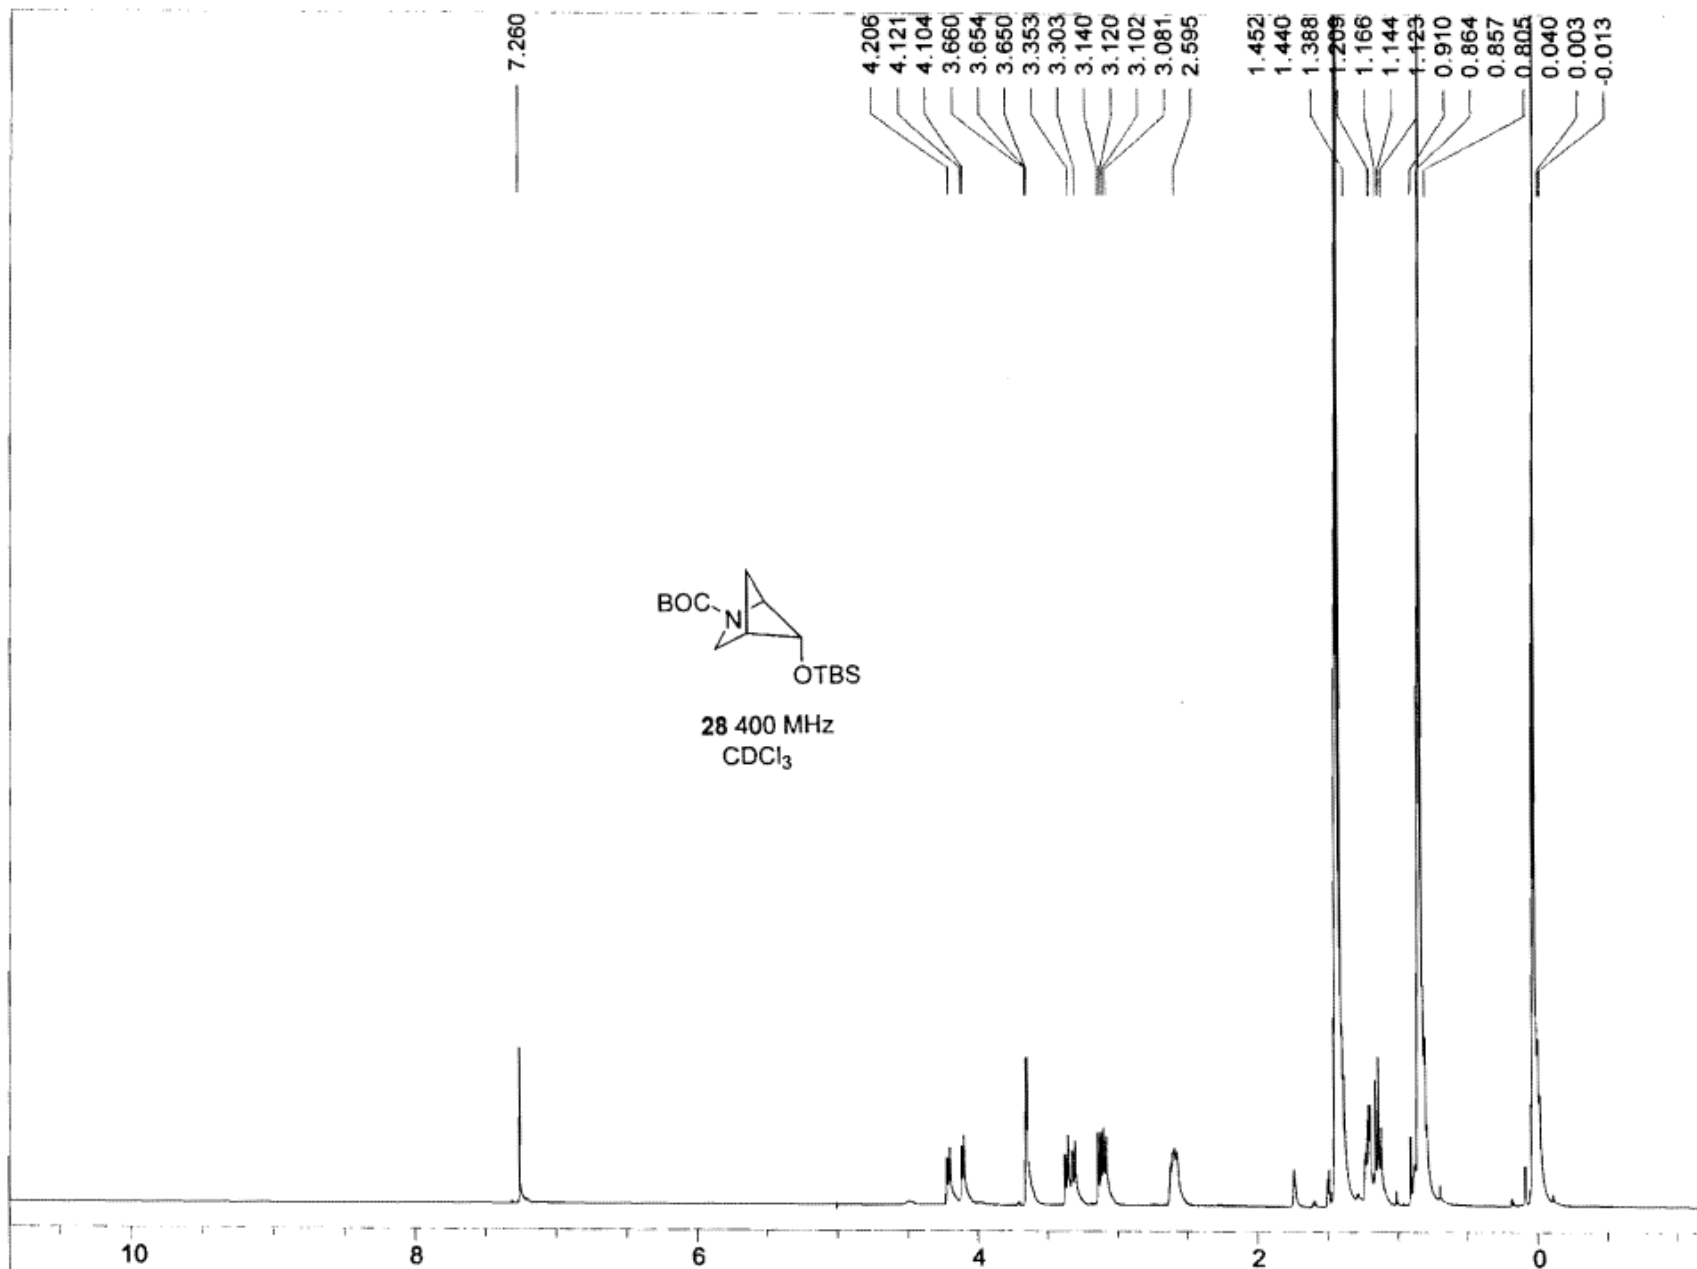

NBoc[2.1.1]syn-OTBS, proton.atm,

USER: temple -- DATE: Apr 16 22:43:50 2008 EDT (UT-4h) templ

F1: 400.130

F2: 1.000

SW1: 8013

OF1: 2004.0

PTS1d: 32768

EX:

PW: 9.8 us

PD: 1.0 sec

NA: 16

LB: 0.1

Nuts - NBoc[2.1.1] syn-OTBS--H--eram-1070

Conformationally Constrained 5-Fluoro- and 5-Hydroxymethanopyrrolidines

S-42

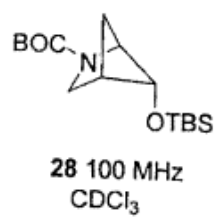

- 156.665
- 156.391
- 78.768
- 77.816
- 77.313
- 77.000
- 76.680
- 69.607
- 64.020
- 63.806
- 62.716
- 55.696
- 45.163
- 44.568
- 42.792
- 40.193
- 37.670
- 28.737
- 28.504
- 28.310
- 25.673
- 25.353
- 17.906
- 5.036
- 5.394

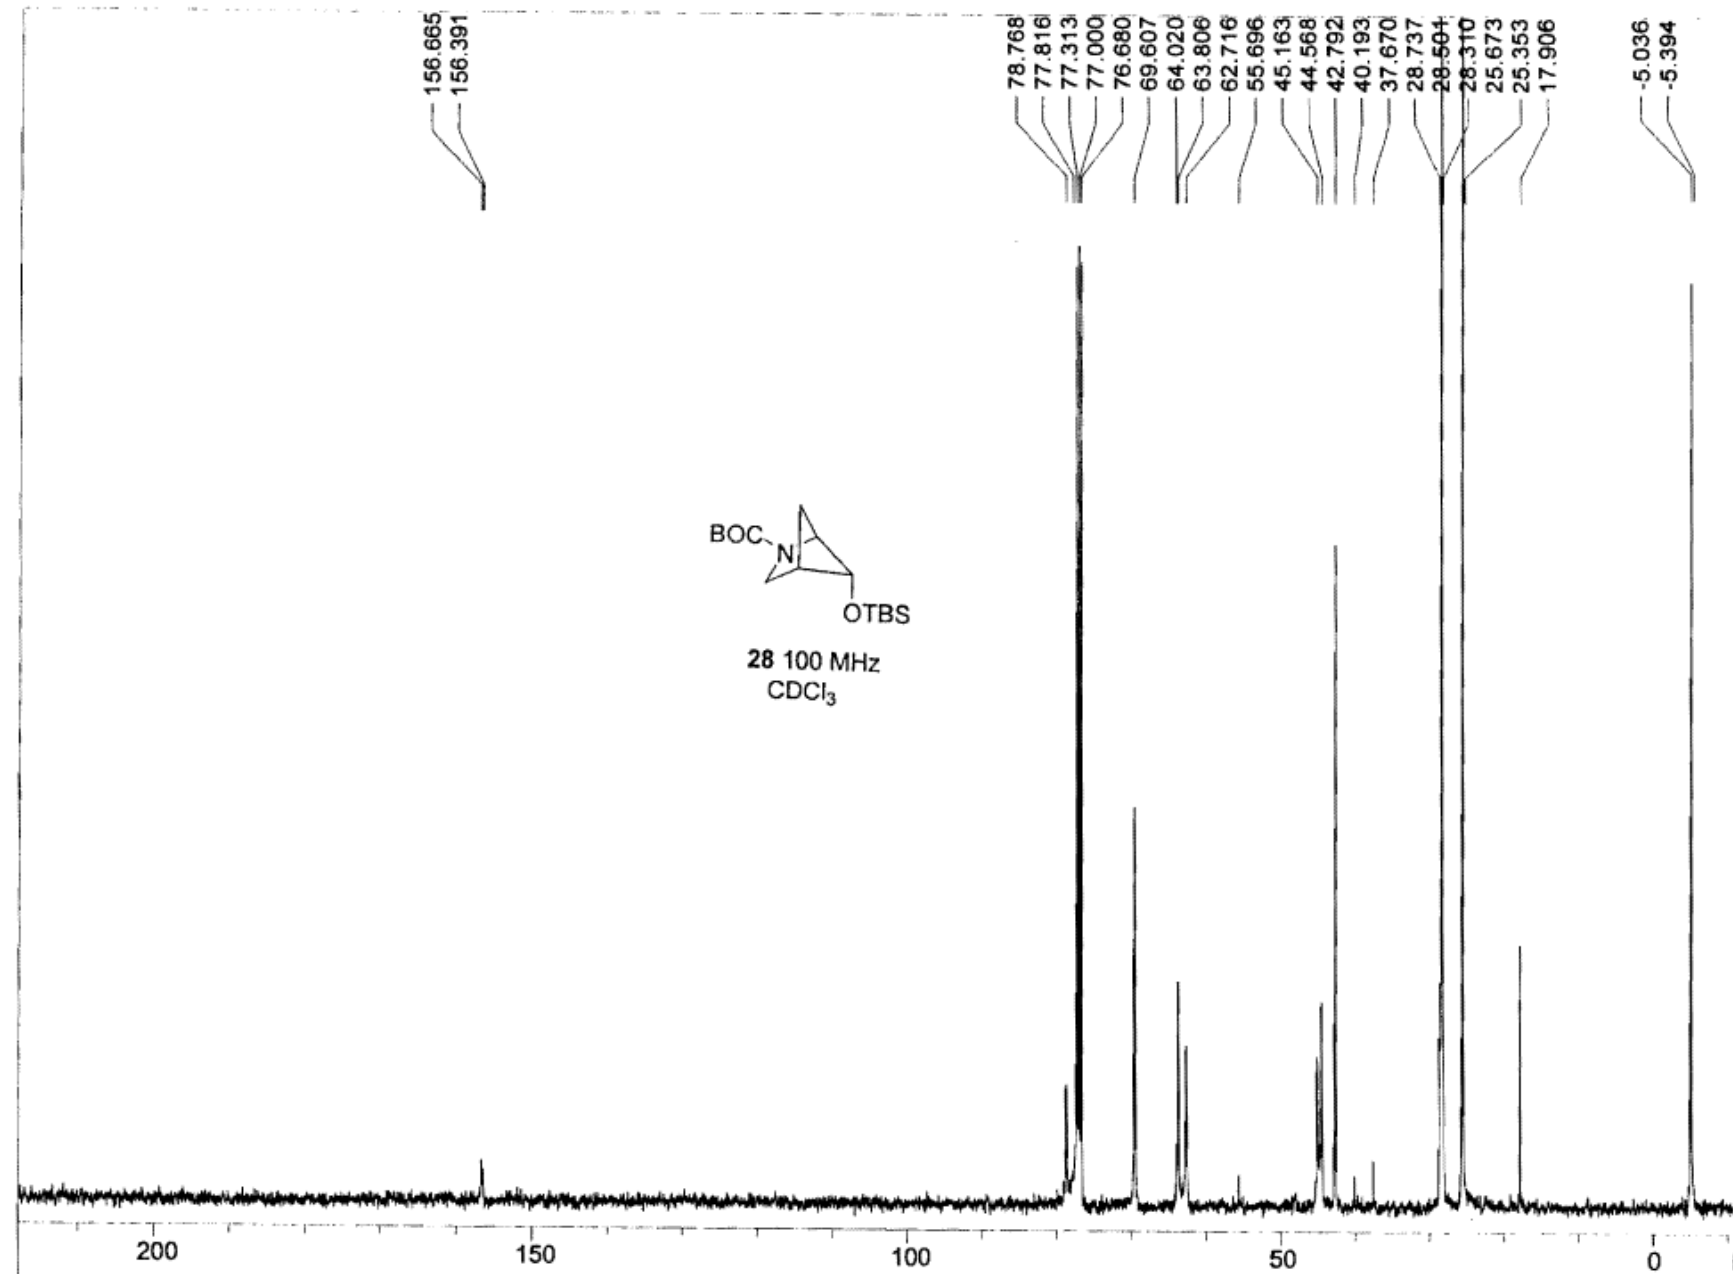

|                                      |           |            |             |                                                              |         |                                            |  |
|--------------------------------------|-----------|------------|-------------|--------------------------------------------------------------|---------|--------------------------------------------|--|
| NBoc[2.1.1] syn-OTBS, carbon1HR.atm. |           |            |             | USER: temple -- DATE: Jun 27 23:05:38 2008 EDT (UT-4h) templ |         |                                            |  |
| FI: 100.613                          | F2: 1.000 | SW1: 25126 |             | OF1: 10021.1                                                 |         | PTS1d: 32768                               |  |
| EX:                                  |           | PW: 5.7 us | PD: 2.0 sec | NA: 2200                                                     | LB: 3.0 | Nuts - NBoc[2.1.1] syn-OTBS---C--eram-1312 |  |

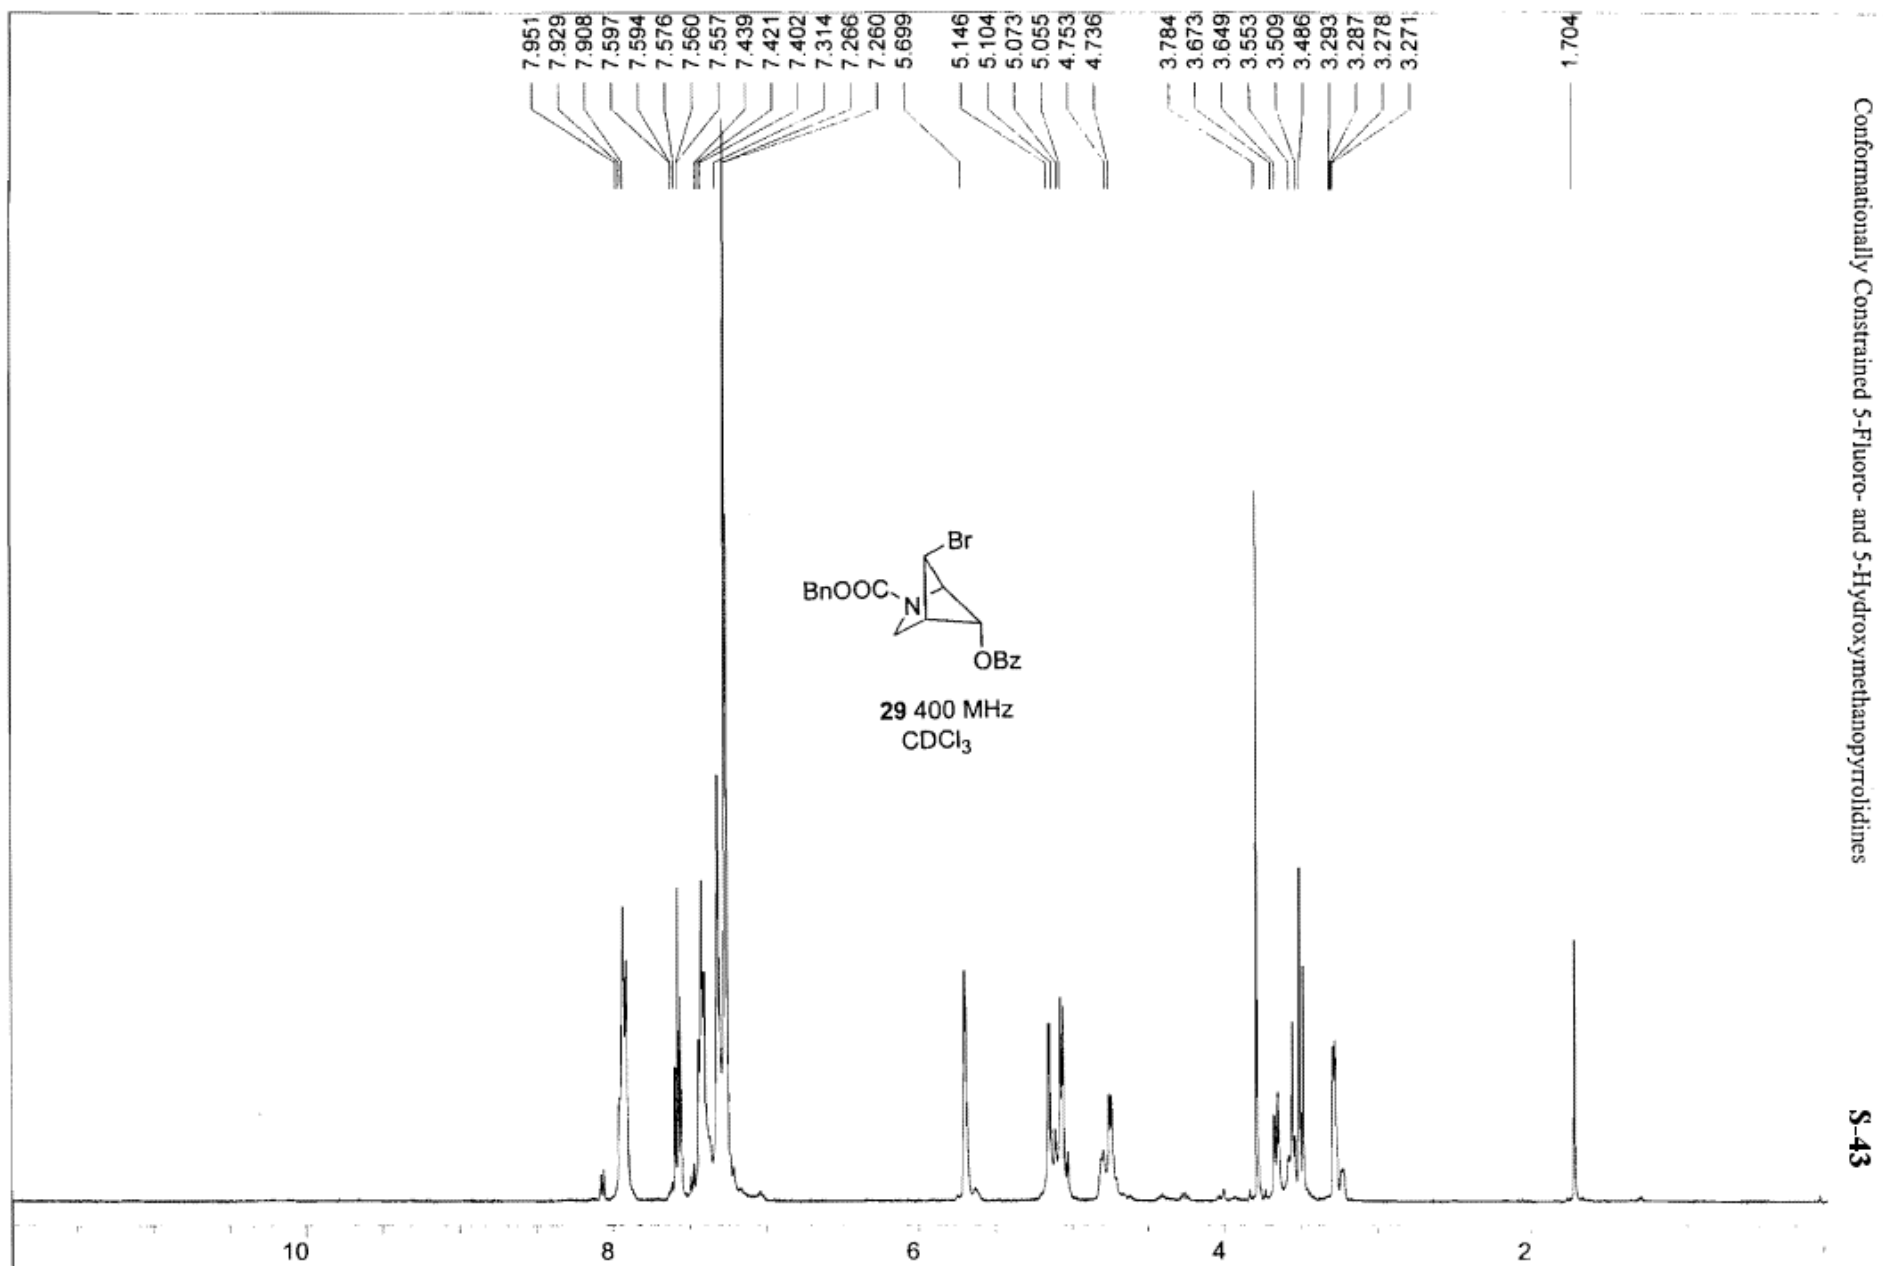

NZ[2.1.1] syn-OBz, anti-Br, proton.atm,

USER: temple -- DATE: Jul 24 21:08:48 2008 EDT (UT-4h) templ

F1: 400.130

F2: 1.000

SW1: 8013

OF1: 2007.2

PTS1d: 32768

EX:

PW: 9.8 usec

PD: 1.0 sec

NA: 16

LB: 0.1

WinNuts - NZ[2.1.1]syn-OBz, anti-Br-H-eram-1425

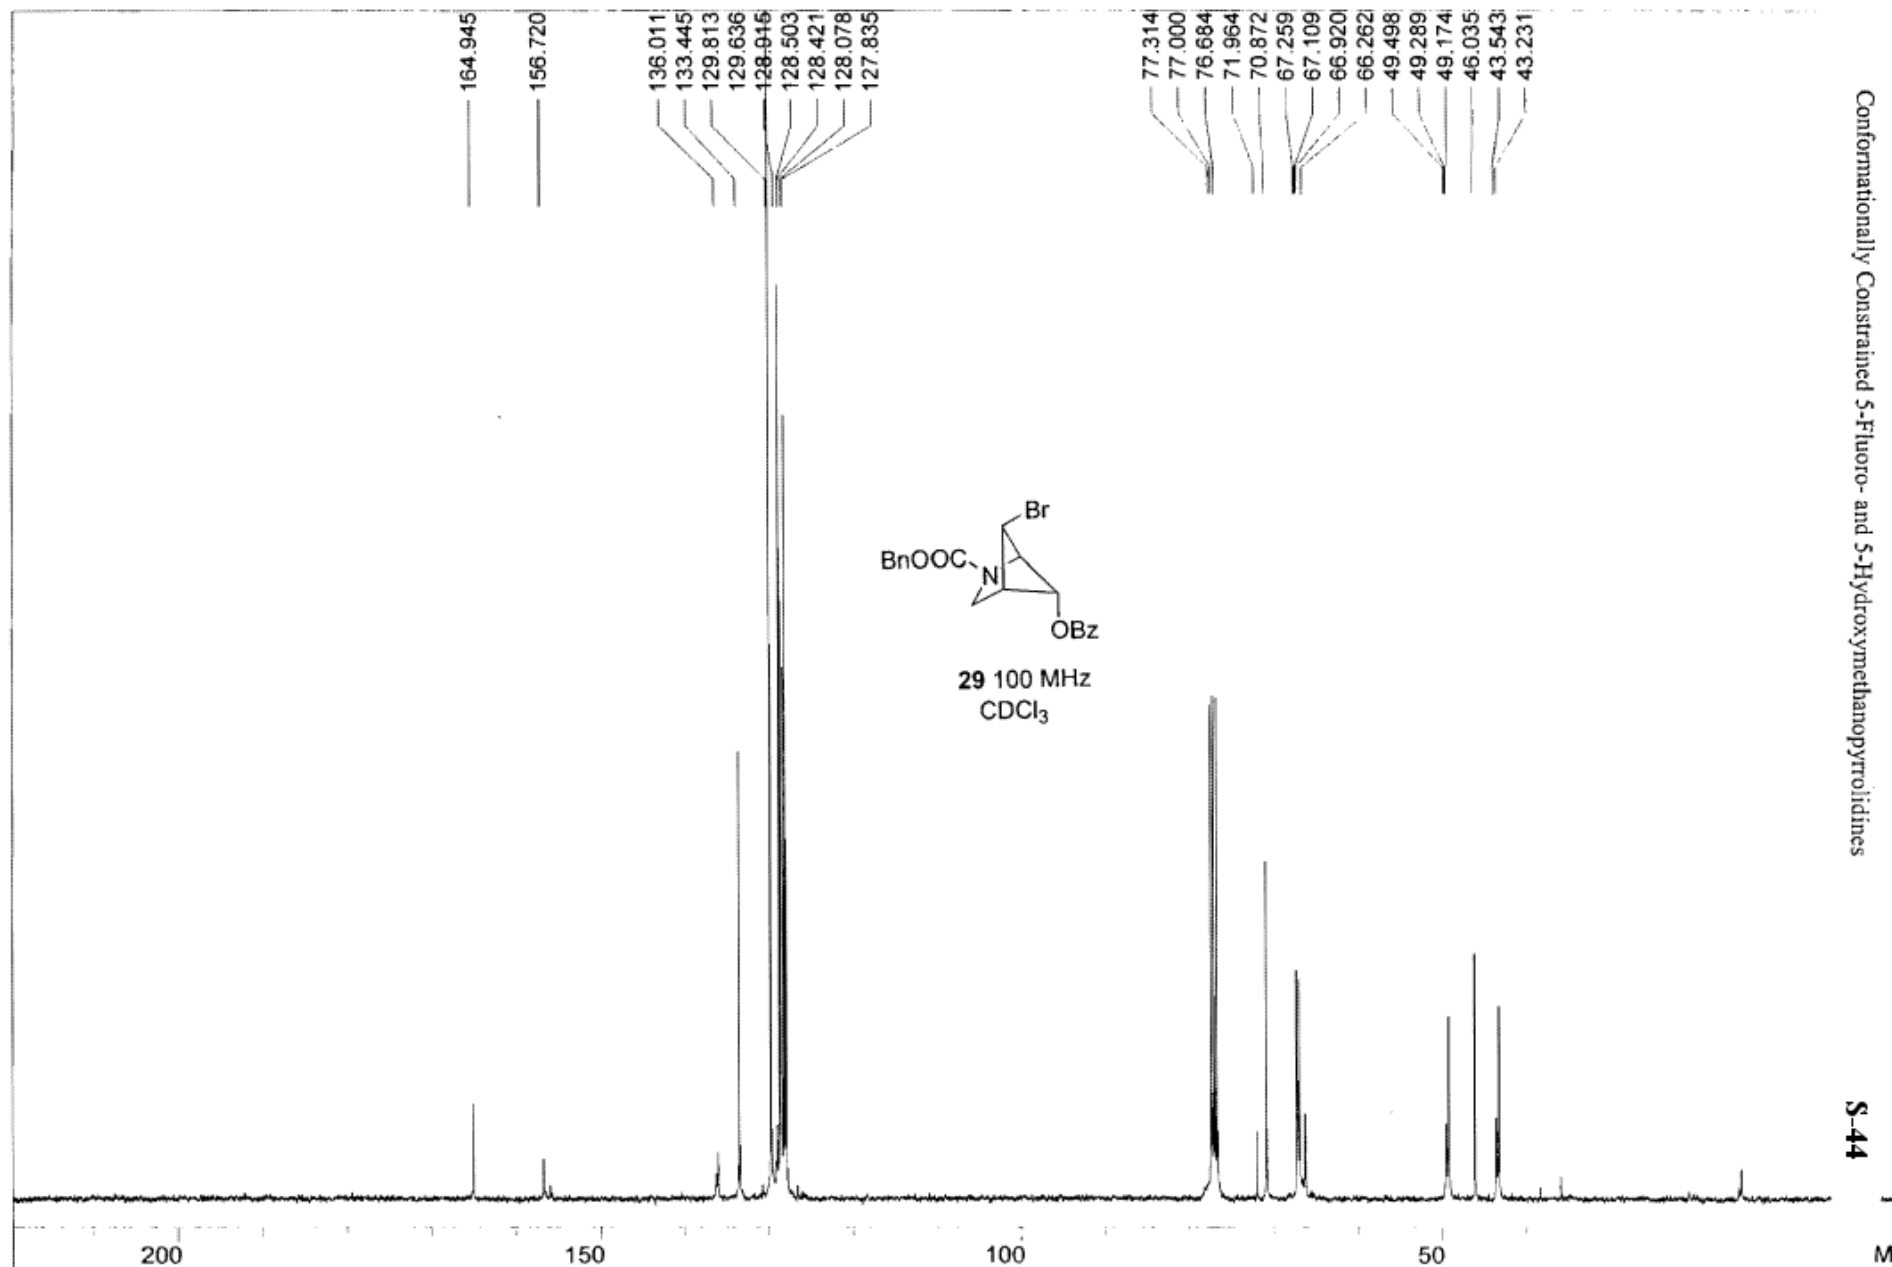

NZ[2.1.1] syn-OBz, anti-Br, carbon1HR.atm,

USER: temple -- DATE: Jul 25 00:27:02 2008 EDT (UT-4h) templ

F1: 100.613

F2: 1.000

SW1: 25126

QF1: 10017.9

PTS1d: 32768

EX:

PW: 5.7 usec

PD: 2.0 sec

NA: 3524

LB: 3.0

WinNuts - \$RAM.1

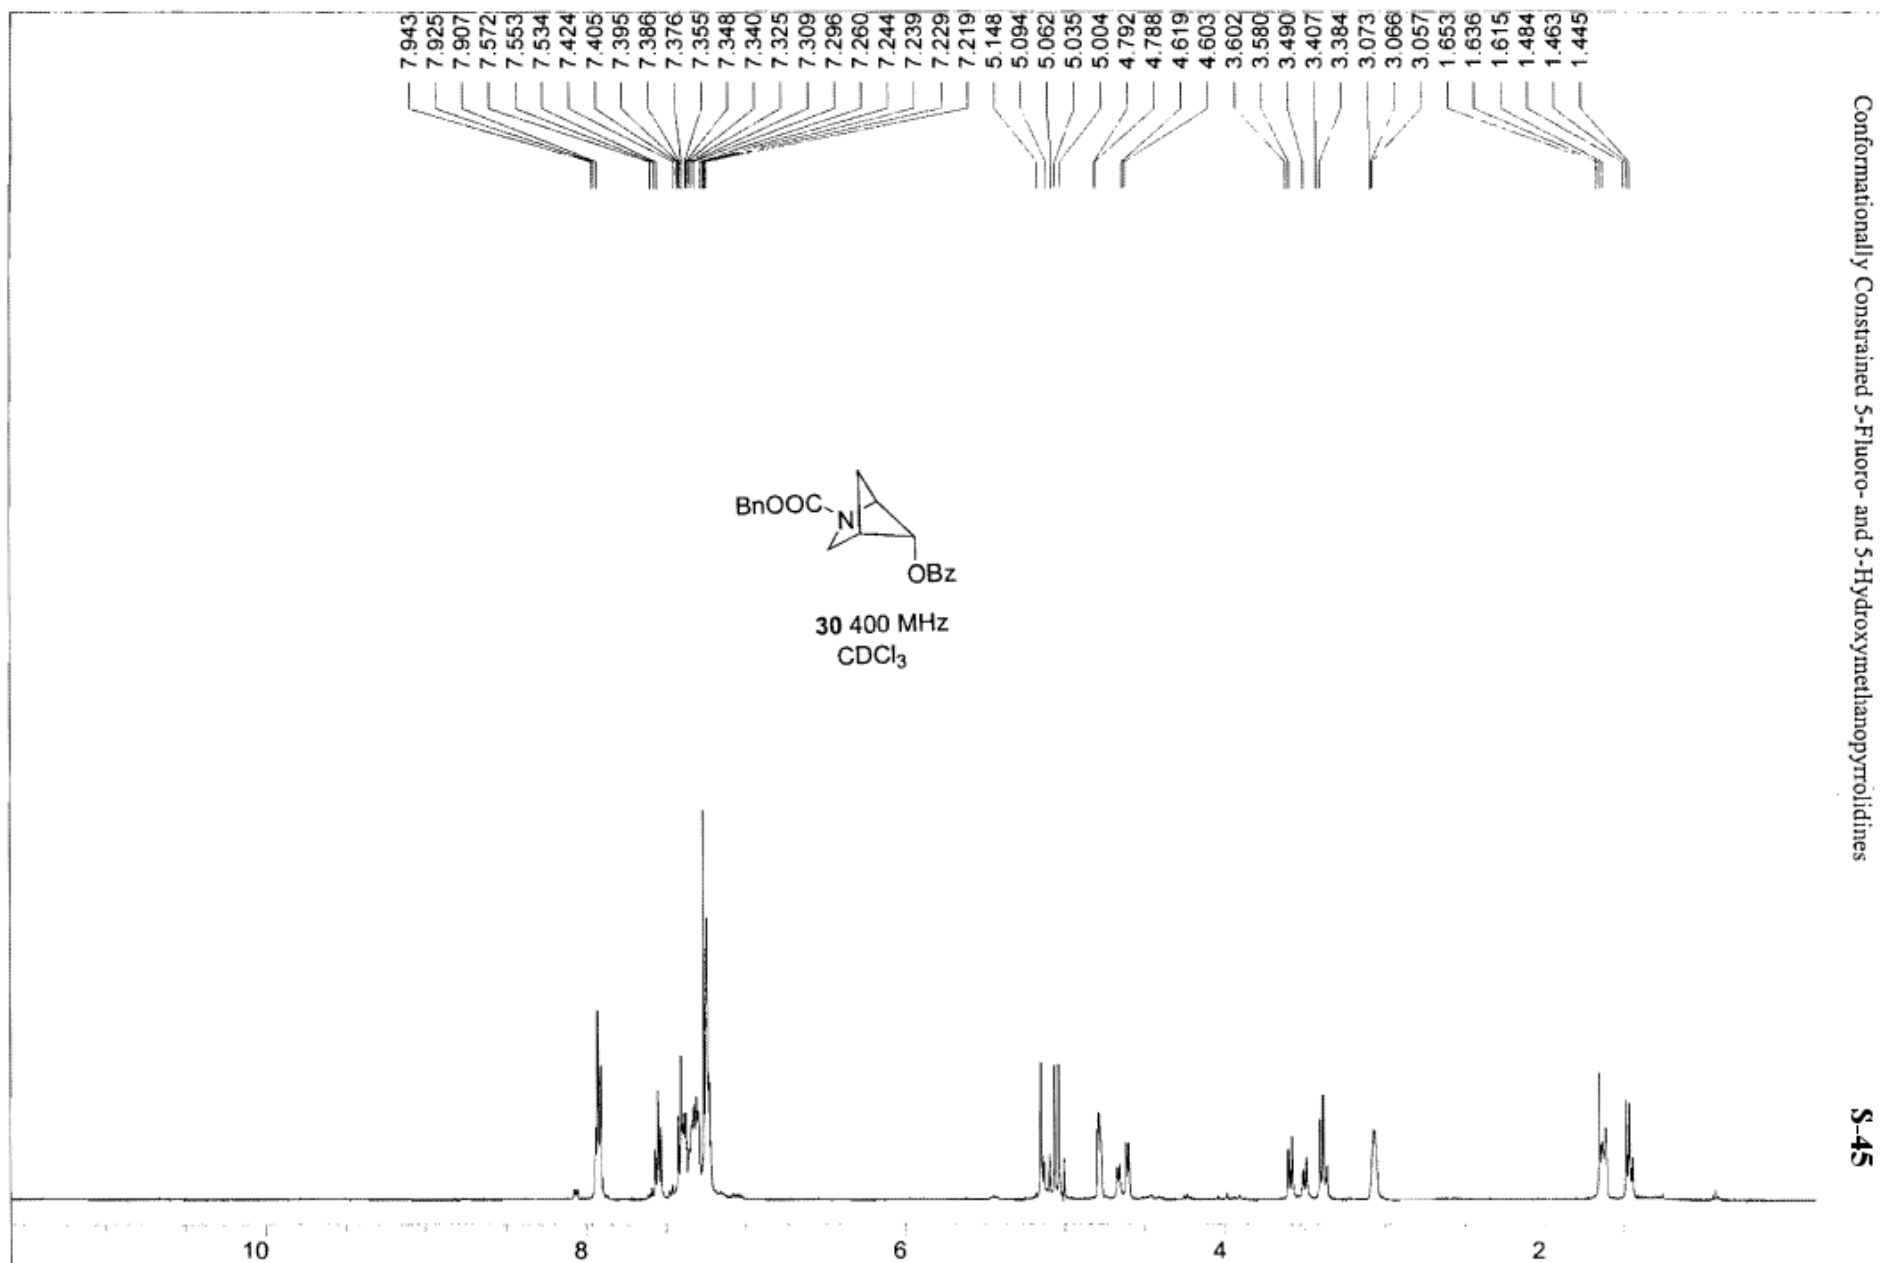

NZ[2.1.1] syn-OBz, proton, atm.

USER: temple -- DATE: Nov\_16 18:44:01 2008 EST (UT-5h) templ

F1: 400.130 F2: 1.000

SW1: 8013

OF1: 2004.6

PTS1d: 32768

EX:

PW: 9.8 usec

PD: 1.0 sec

NA: 16

LB: 0.1

WinNuts - NZ[2.1.1]syn-OBz--H--eram-1668

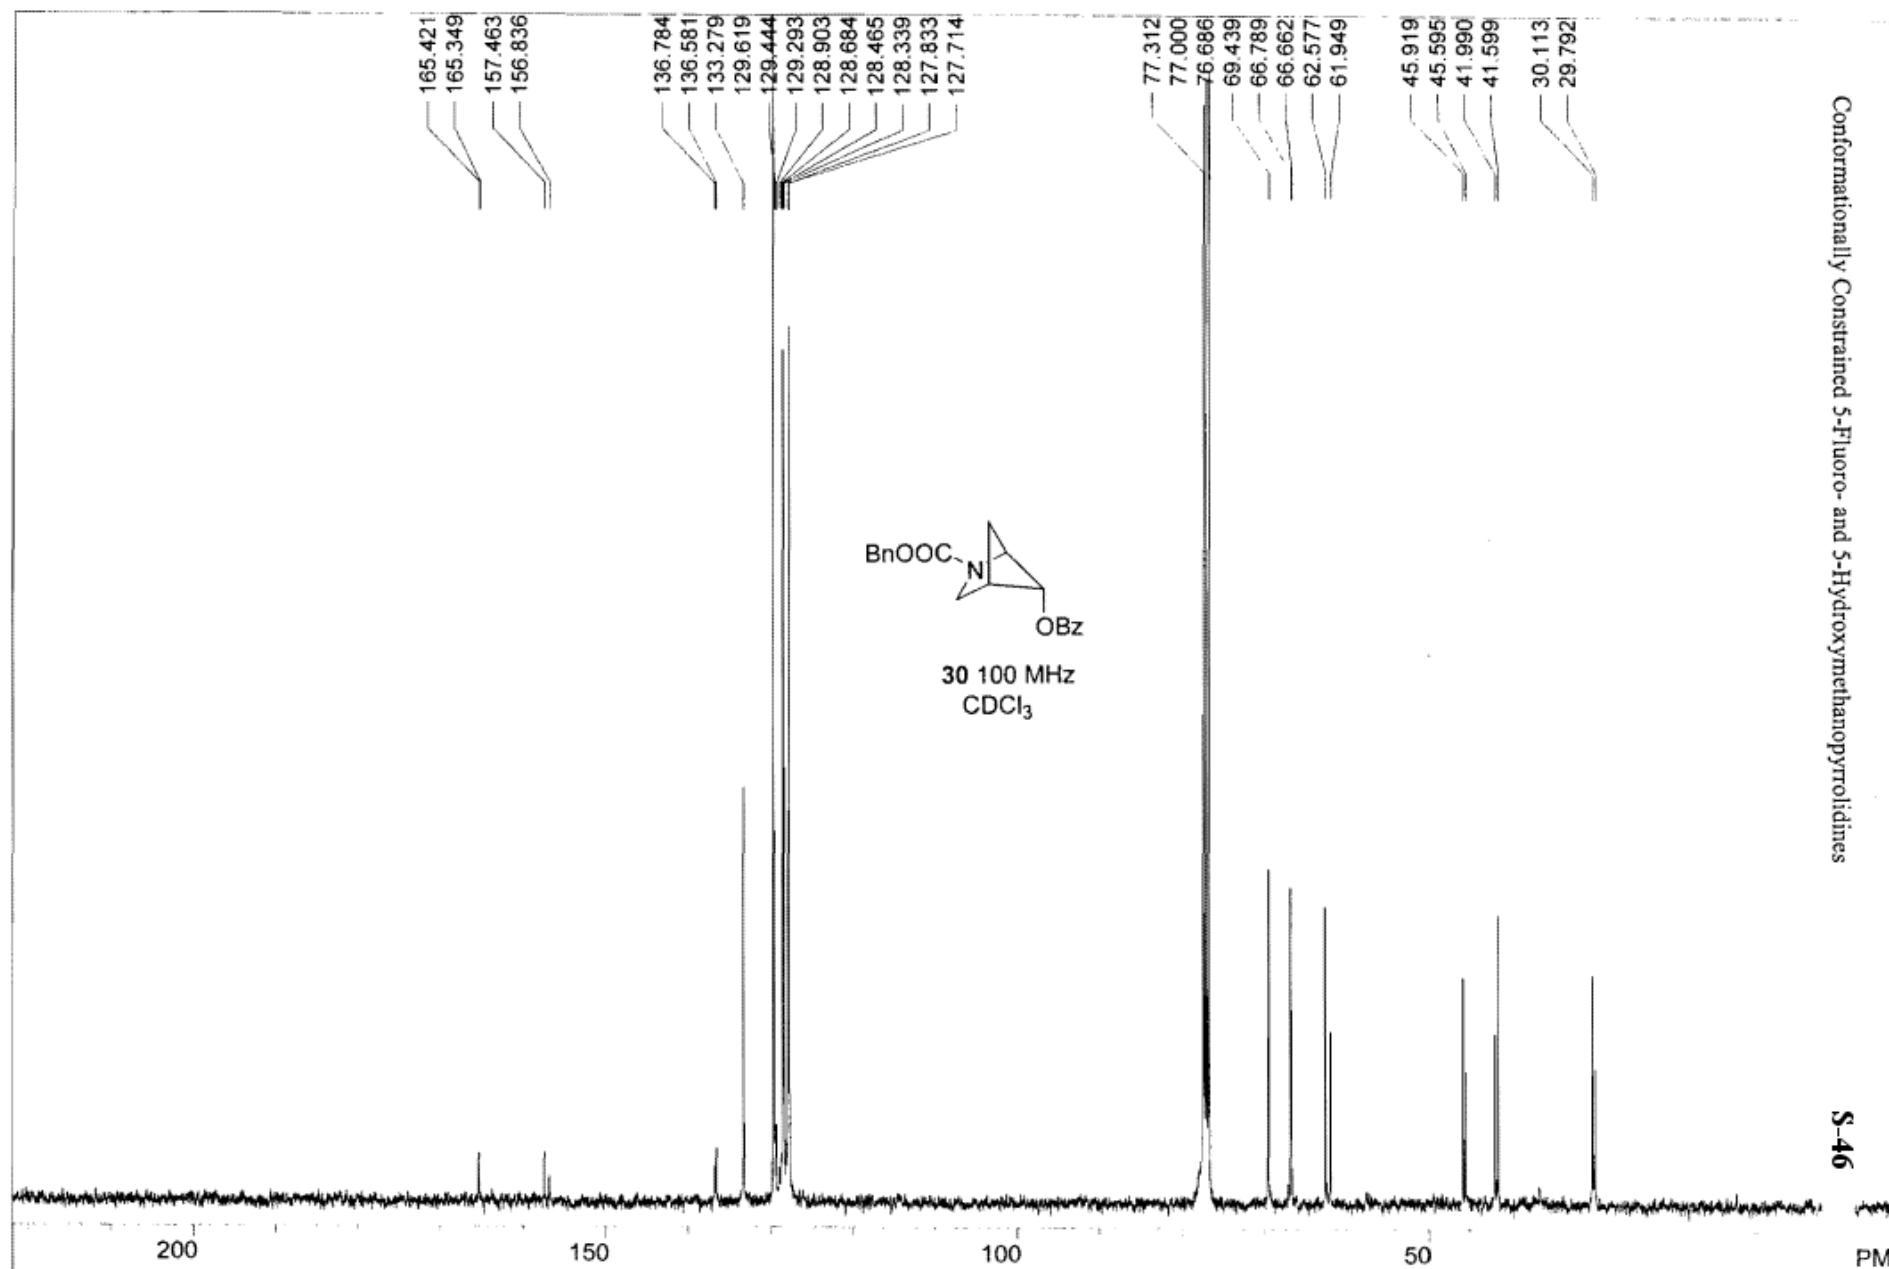

NZ[2.1.1] syn-OBz, carbon1HR.atm,

USER: temple -- DATE: Nov 16 21:35:15 2008 EST (UT-5h) templ

F1: 100.613

F2: 1.000

SW1: 25126

OF1: 10020.9

PTS1d: 32768

EX:

PW: 5.7 usec

PD: 2.0 sec

NA: 3024

LB: 3.0

WinNuts - NZ[2.1.1] syn-OBz--C--eram-1669

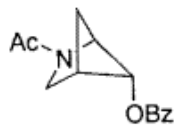

31 400 MHz  
CDCl<sub>3</sub>

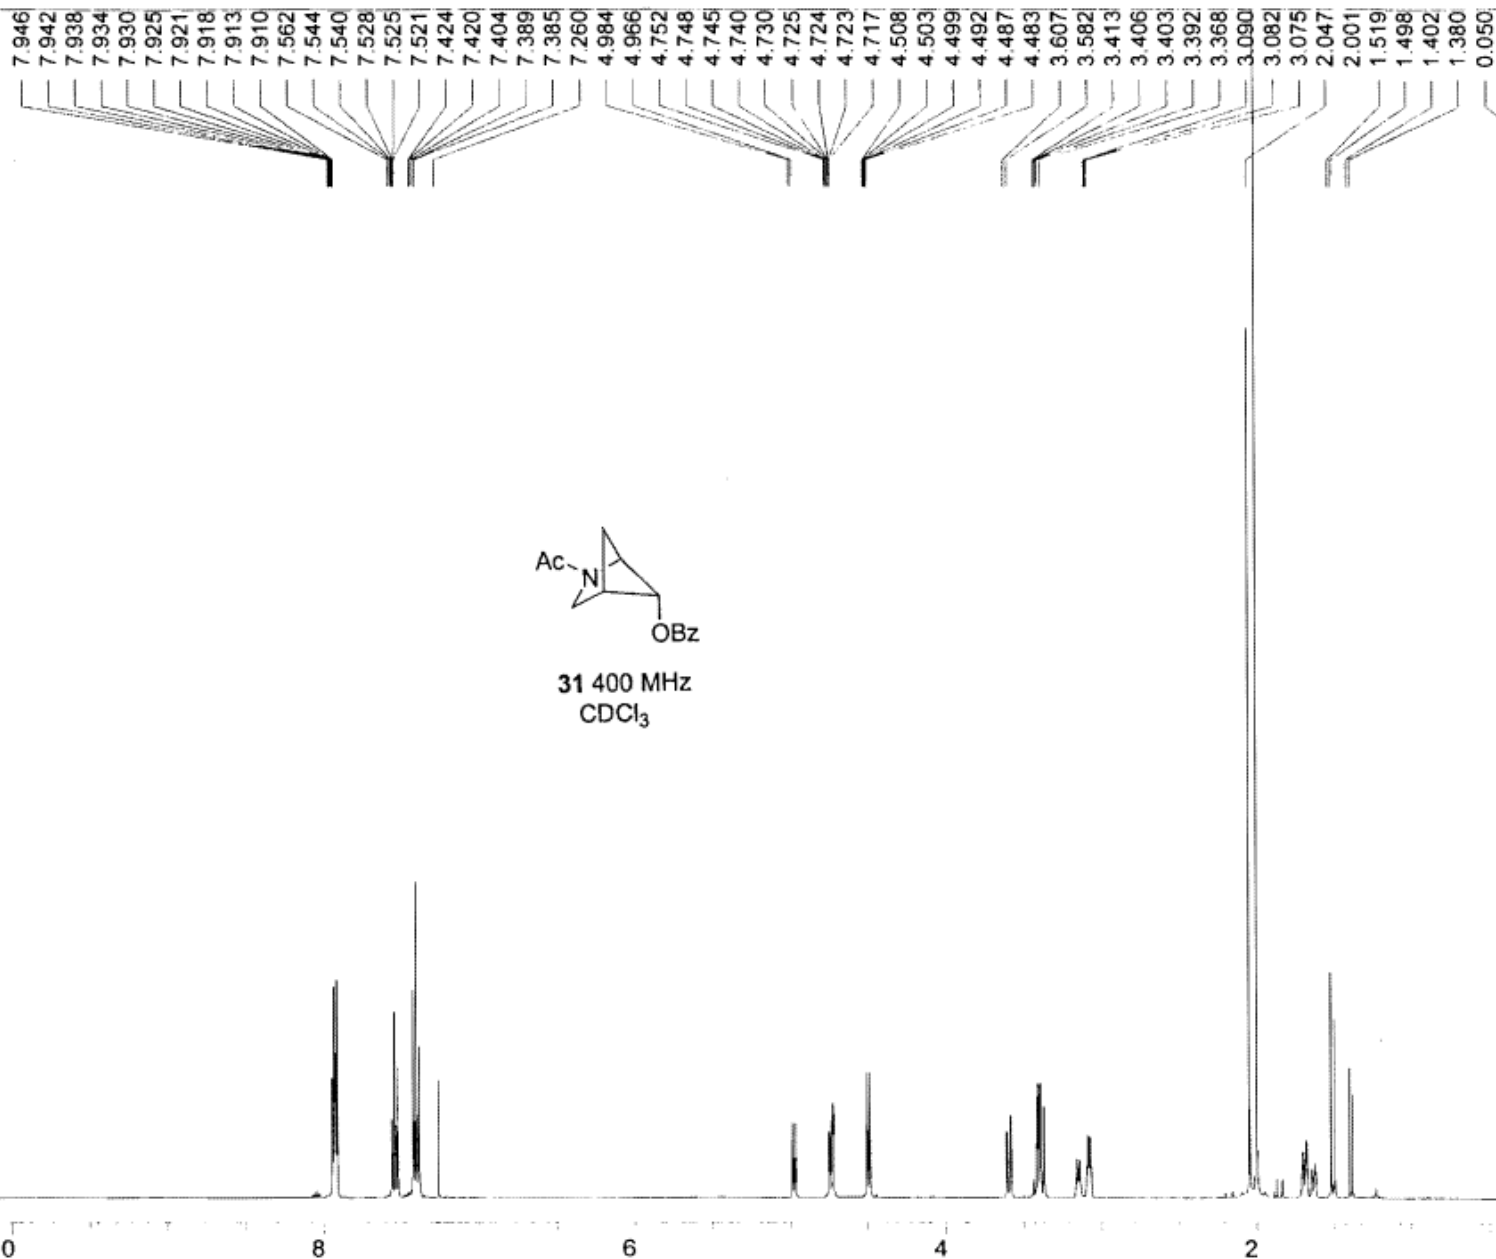

NAC[2.1.1]syn-OBz, proton.atm,

USER: temple -- DATE: Nov 15 12:11:49 2008 EST (UT-5h) temp!

F1: 400.130

F2: 1.000

SW1: 8013

OF1: 2004.6

PTS1d: 32768

EX:

PW: 9.8 usec

PD: 1.0 sec

NA: 160

LB: 0.1

WinNuts - NAC[2.1.1]syn-OBz---H--cram-1665

Conformationally Constrained 5-Fluoro- and 5-Hydroxymethanopyrrolidines

S-48

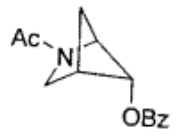

31 400 MHz  
D<sub>2</sub>O

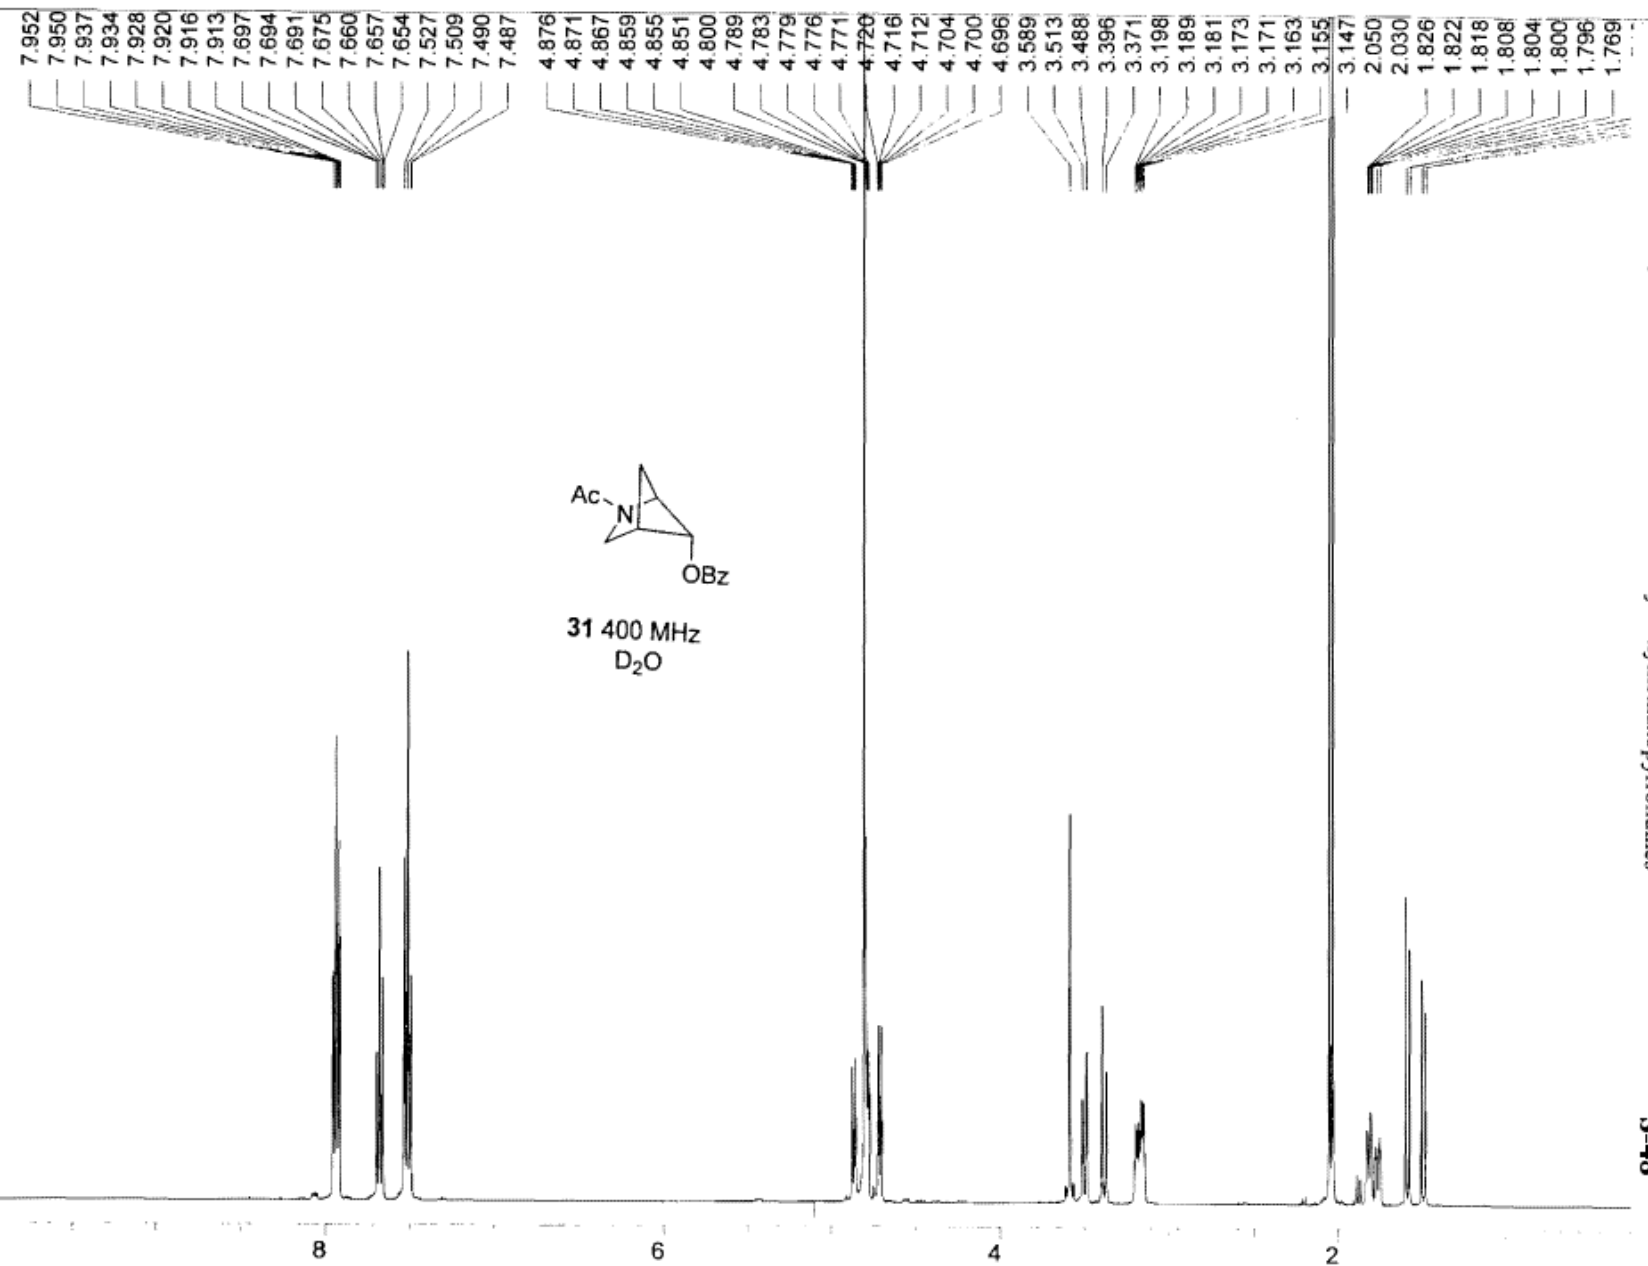

|                                      |              |                                                              |             |              |                                                 |
|--------------------------------------|--------------|--------------------------------------------------------------|-------------|--------------|-------------------------------------------------|
| NAC[2.1.1] syn-OBz, proton10MIN.atm, |              | USER: temple -- DATE: Nov 22 22:17:52 2008 EST (UT-5h) templ |             |              |                                                 |
| F1: 400.130                          | F2: 1.000    | SW1: 8278                                                    | OF1: 2041.5 | PTS1d: 32768 |                                                 |
| EX:                                  | PW: 9.8 usec | PD: 1.0 sec                                                  | NA: 428     | LB: 0.1      | WinNuts NAC[2.1.1].syn-OBz---H--eram-1680 (D2O) |



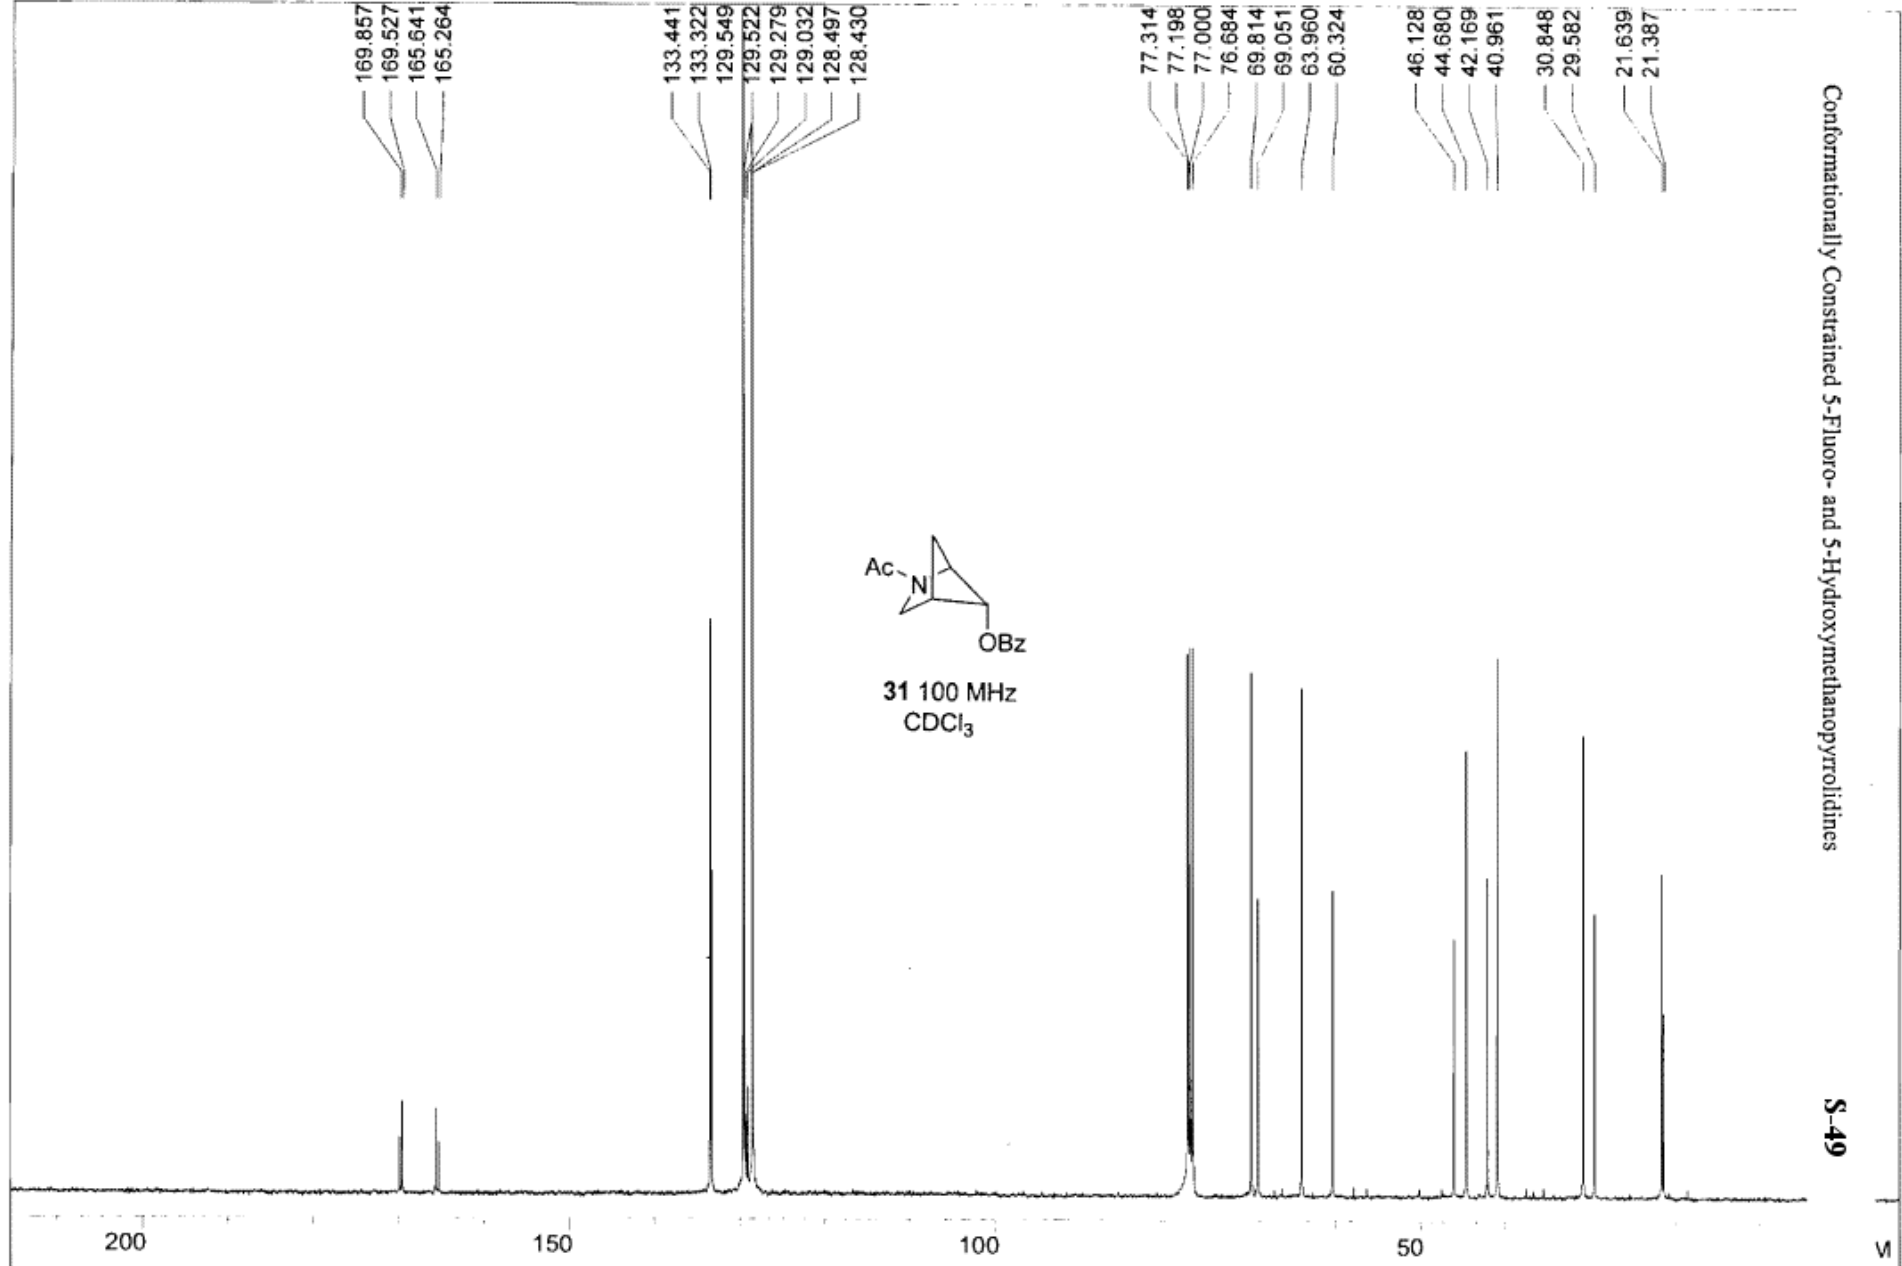

|                                            |           |                                                              |              |              |         |
|--------------------------------------------|-----------|--------------------------------------------------------------|--------------|--------------|---------|
| NAC[2.1.1] syn-OBz. carbonOVNTE.all.       |           | USER: temple -- DATE: Nov 15 05:17:21 2008 EST (UT-5h) templ |              |              |         |
| F1: 100.613                                | F2: 1.000 | SW1: 25126                                                   | OF1: 10017.2 | PTS1d: 32768 |         |
| EX:                                        |           | PW: 5.7 usec                                                 | PD: 2.0 sec  | NA: 8000     | LB: 3.0 |
| WinNuts - NAC[2.1.1] syn-OBz--C--eram-1664 |           |                                                              |              |              |         |

Conformationally Constrained 5-Fluoro- and 5-Hydroxymethanopyrrolidines

S-50

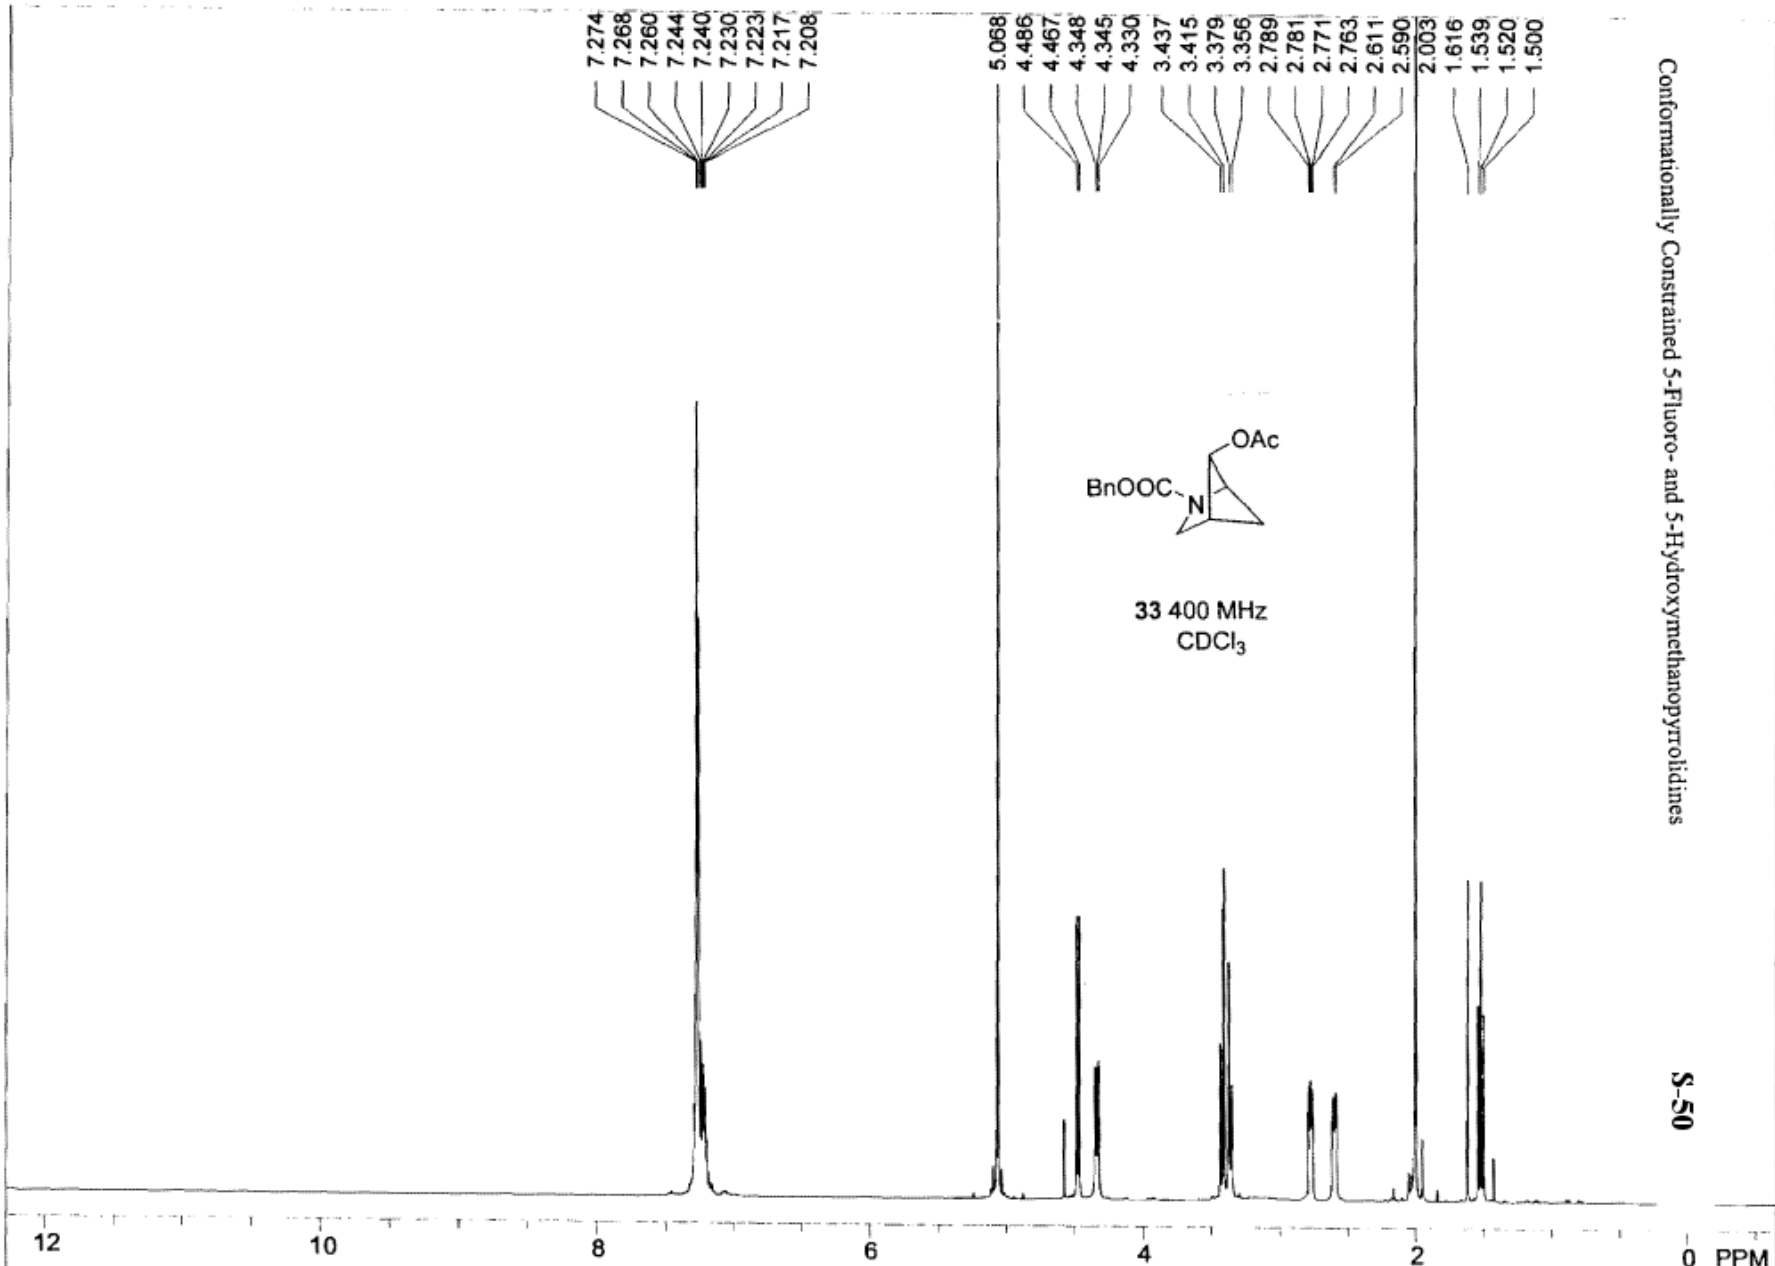

- 7.274
- 7.268
- 7.260
- 7.244
- 7.240
- 7.230
- 7.223
- 7.217
- 7.208
- 5.068
- 4.486
- 4.467
- 4.348
- 4.345
- 4.330
- 3.437
- 3.415
- 3.379
- 3.356
- 2.789
- 2.781
- 2.771
- 2.763
- 2.611
- 2.590
- 2.003
- 1.616
- 1.539
- 1.520
- 1.500

|                                        |           |                                                              |             |              |         |
|----------------------------------------|-----------|--------------------------------------------------------------|-------------|--------------|---------|
| NZ[2.1.1]OAc, proton.atm.              |           | USER: temple -- DATE: Oct 12 23:23:34 2007 EDT (UT-4h) templ |             |              |         |
| F1: 400.191                            | F2: 1.000 | SW1: 8278                                                    | OF1: 1980.4 | PTS1d: 32768 |         |
| EX:                                    |           | PW: 9.8 us                                                   | PD: 1.0 sec | NA: 16       | LB: 0.1 |
| Nuts - NZ[2.1.1] anti-OAc--H--eram-756 |           |                                                              |             |              |         |

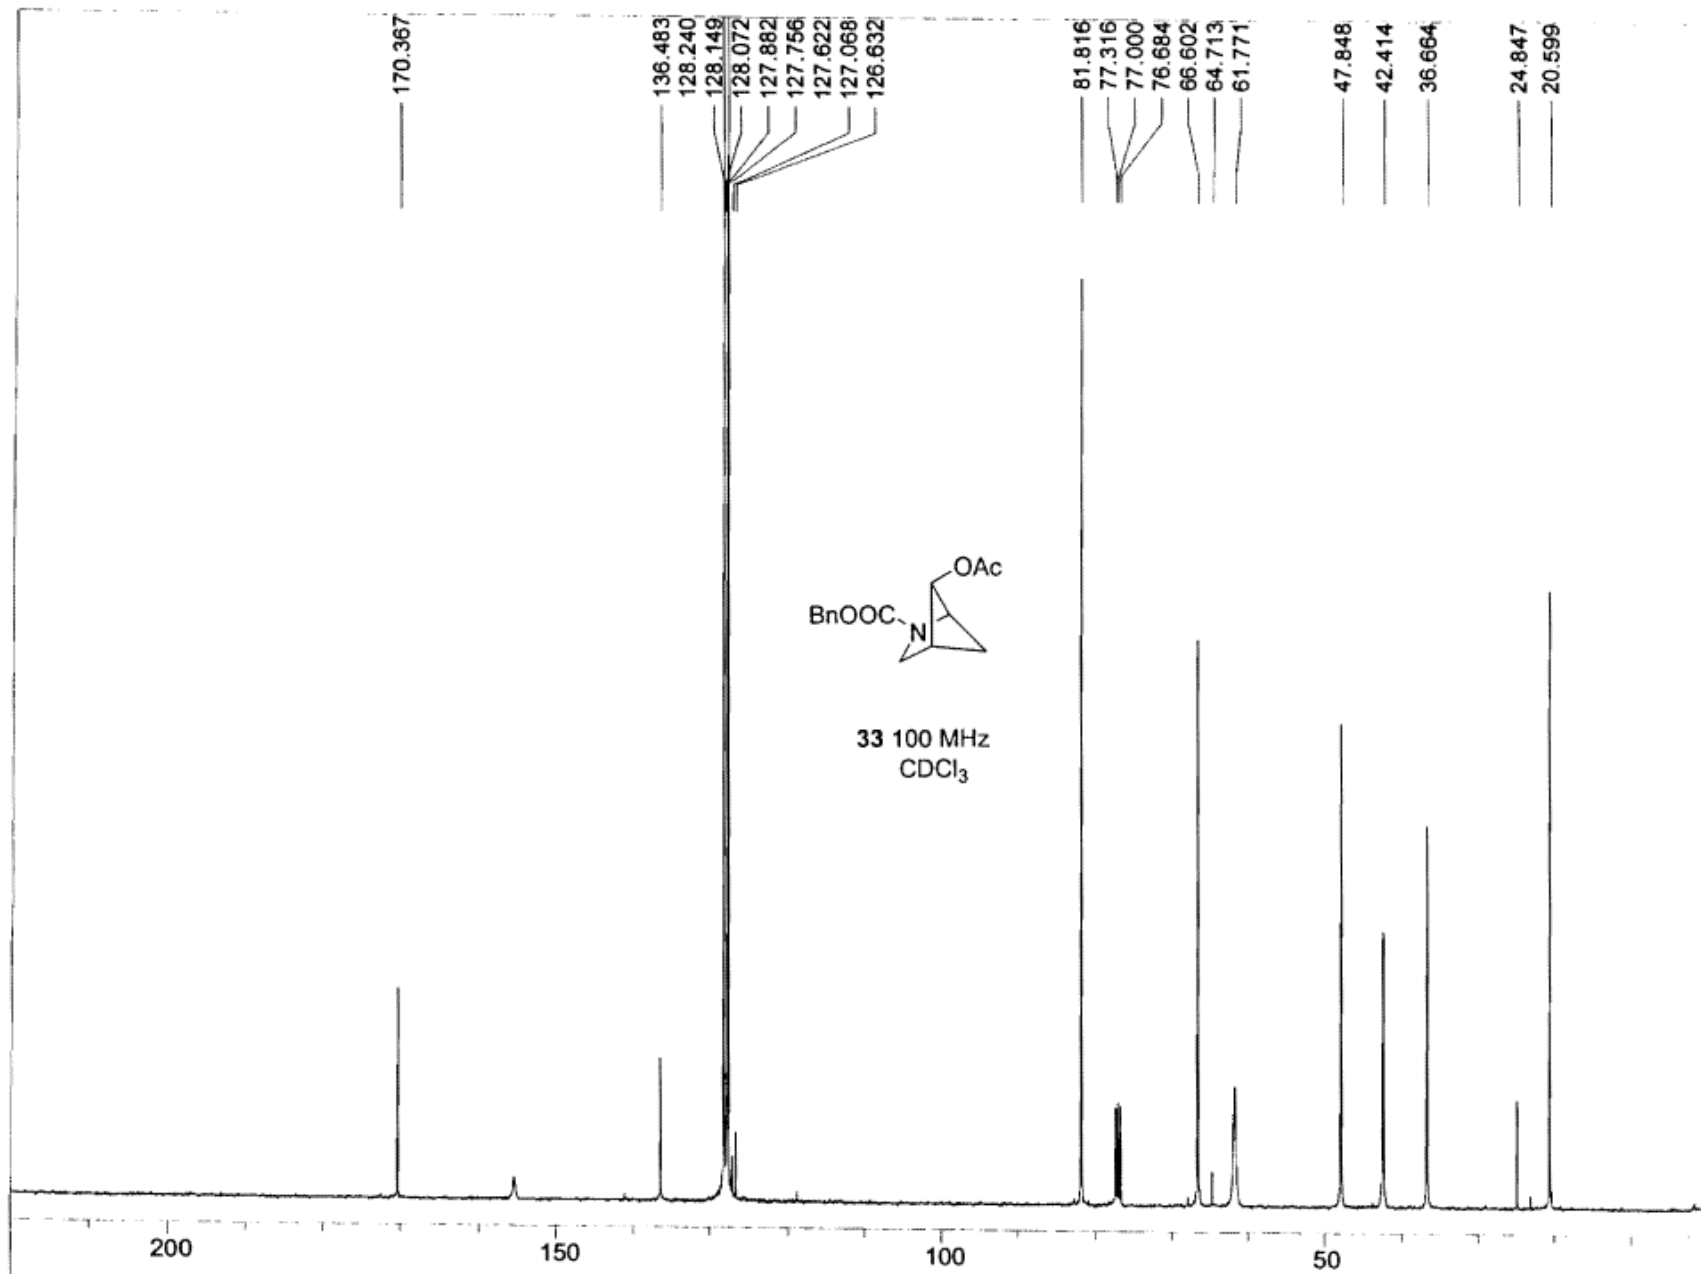

|                                |           |            |             |                                                              |         |                                        |  |
|--------------------------------|-----------|------------|-------------|--------------------------------------------------------------|---------|----------------------------------------|--|
| NZ[2.1.1]OAc, carbon30MIN.atm. |           |            |             | USER: temple -- DATE: Oct 12 23:16:18 2007 EDT (UT-4h) templ |         |                                        |  |
| F1: 100.628                    | F2: 1.000 | SW1: 23148 |             | OF1: 10562.4                                                 |         | PTS1d: 32768                           |  |
| EX:                            |           | PW: 5.7 us | PD: 2.0 sec | NA: 1112                                                     | LB: 3.0 | Nuts - NZ[2.1.1] anti-OAc--C--eram-755 |  |

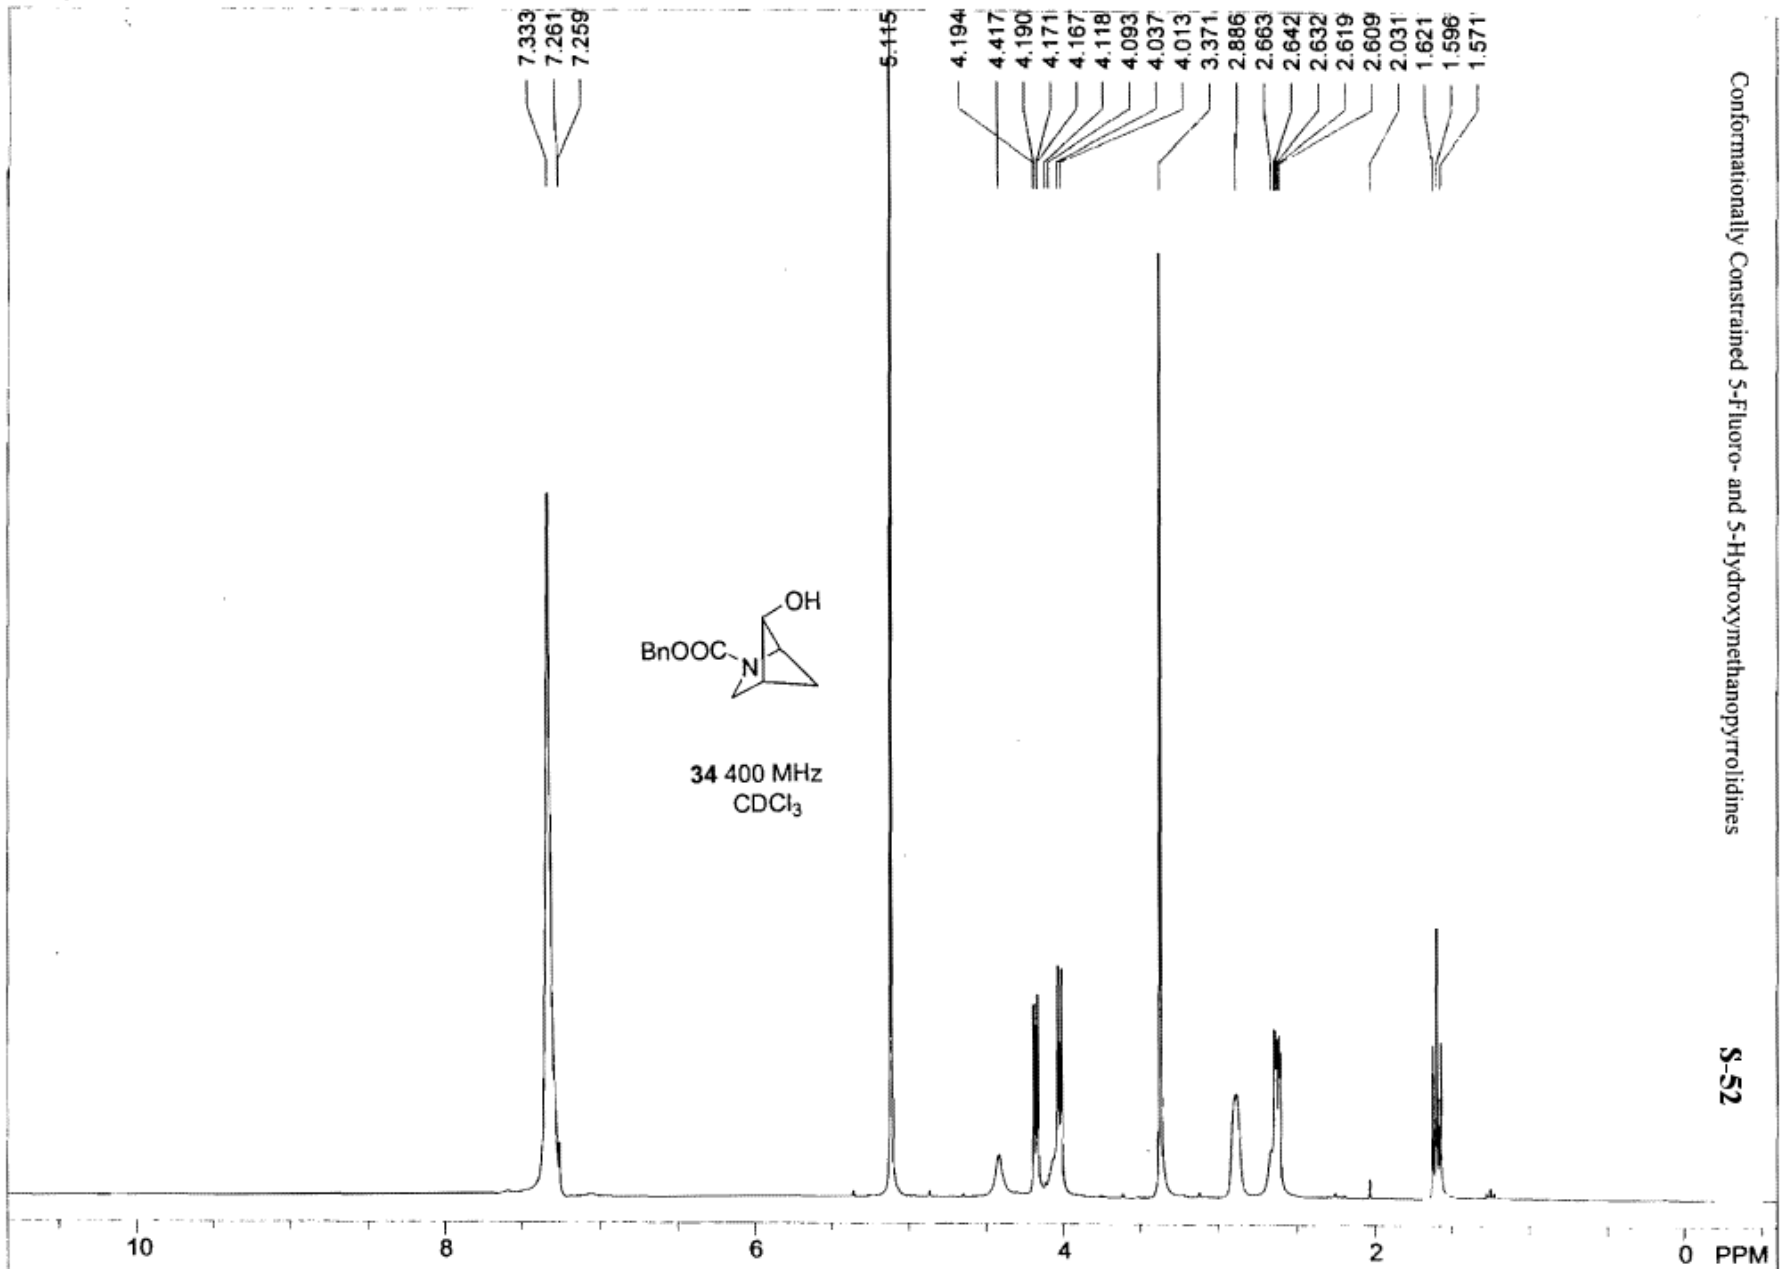

eram/12-53-2\_13Oct2007

USER: -- DATE: Oct 13 2007

|             |             |             |             |                                                             |
|-------------|-------------|-------------|-------------|-------------------------------------------------------------|
| F1: 300.018 | F2: 300.018 | SW1: 4800   | OF1: 1782.0 | PTS1d: 16384                                                |
| EX: s2pul   | PW: 4.0 us  | PD: 1.0 sec | NA: 8       | LB: 0.000 - NZ[2.1.1].anti-OH---H---eram-12-53-2 on_300 NMR |

Conformationally Constrained 5-Fluoro- and 5-Hydroxymethanopyrrolidines

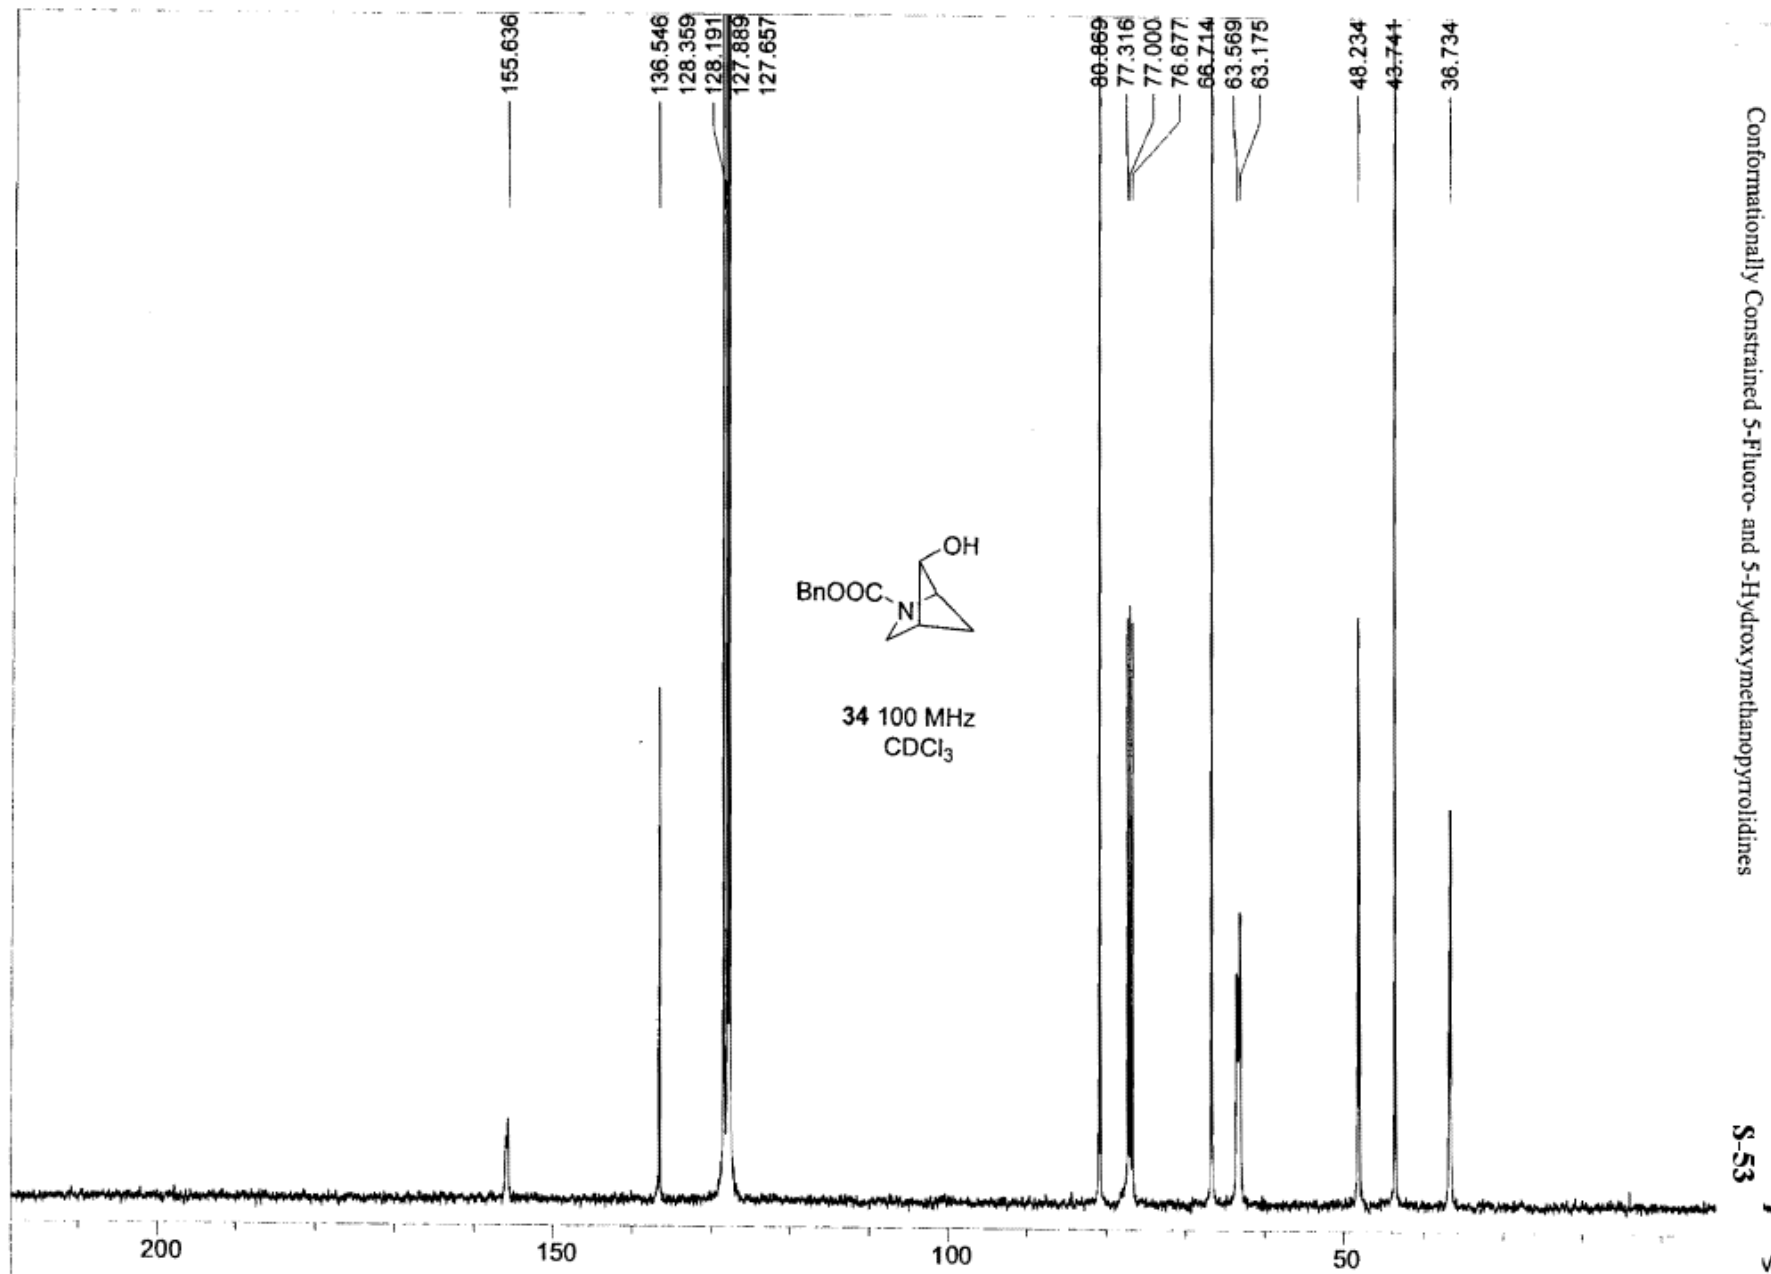

S-53

|                               |            |             |                                                              |              |                                       |              |
|-------------------------------|------------|-------------|--------------------------------------------------------------|--------------|---------------------------------------|--------------|
| NZ[2.1.1]OH, carbon30MIN.atm, |            |             | USER: temple -- DATE: Oct 13 00:37:19 2007 EDT (UT-4h) templ |              |                                       |              |
| FI: 100.628                   | F2: 1.000  | SW1: 23148  |                                                              | OF1: 10570.2 |                                       | PTS1d: 32768 |
| EX:                           | PW: 5.7 us | PD: 2.0 sec | NA: 1112                                                     | LB: 3.0      | Nuts - NZ[2.1.1] anti-OH--C--eram-757 |              |

Conformationally Constrained 5-Fluoro- and 5-Hydroxymethanopyrrolidines

S-54

8.072  
8.069  
8.056  
8.052  
8.048  
7.611  
7.608  
7.605  
7.590  
7.574  
7.571  
7.567  
7.483  
7.464  
7.449  
7.444  
7.260  
4.816  
4.797  
4.446  
3.537  
3.515  
3.458  
3.437  
2.989  
2.979  
2.973  
2.797  
2.780  
2.777  
1.684  
1.665  
1.645  
1.486

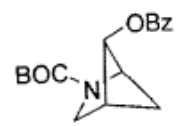

35 400 MHz  
CDCl<sub>3</sub>

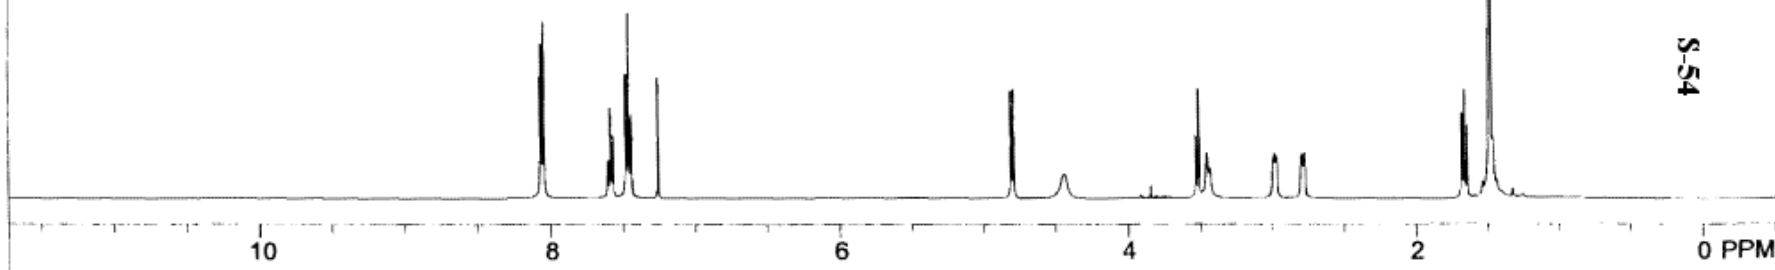

|             |           |                                                              |             |             |         |                                          |  |
|-------------|-----------|--------------------------------------------------------------|-------------|-------------|---------|------------------------------------------|--|
| proton.atm. |           | USER: temple -- DATE: Nov. 3 23:37:03 2007 EST (UT-5h) templ |             |             |         |                                          |  |
| F1: 400.191 | F2: 1.000 | SW1: 8278                                                    |             | OF1: 2002.6 |         | PTS1d: 32768                             |  |
| EX:         |           | PW: 9.8 us                                                   | PD: 1.0 sec | NA: 16      | LB: 0.1 | Nuts - NBoc[2.1.1] anti-OBz--H--eram-790 |  |

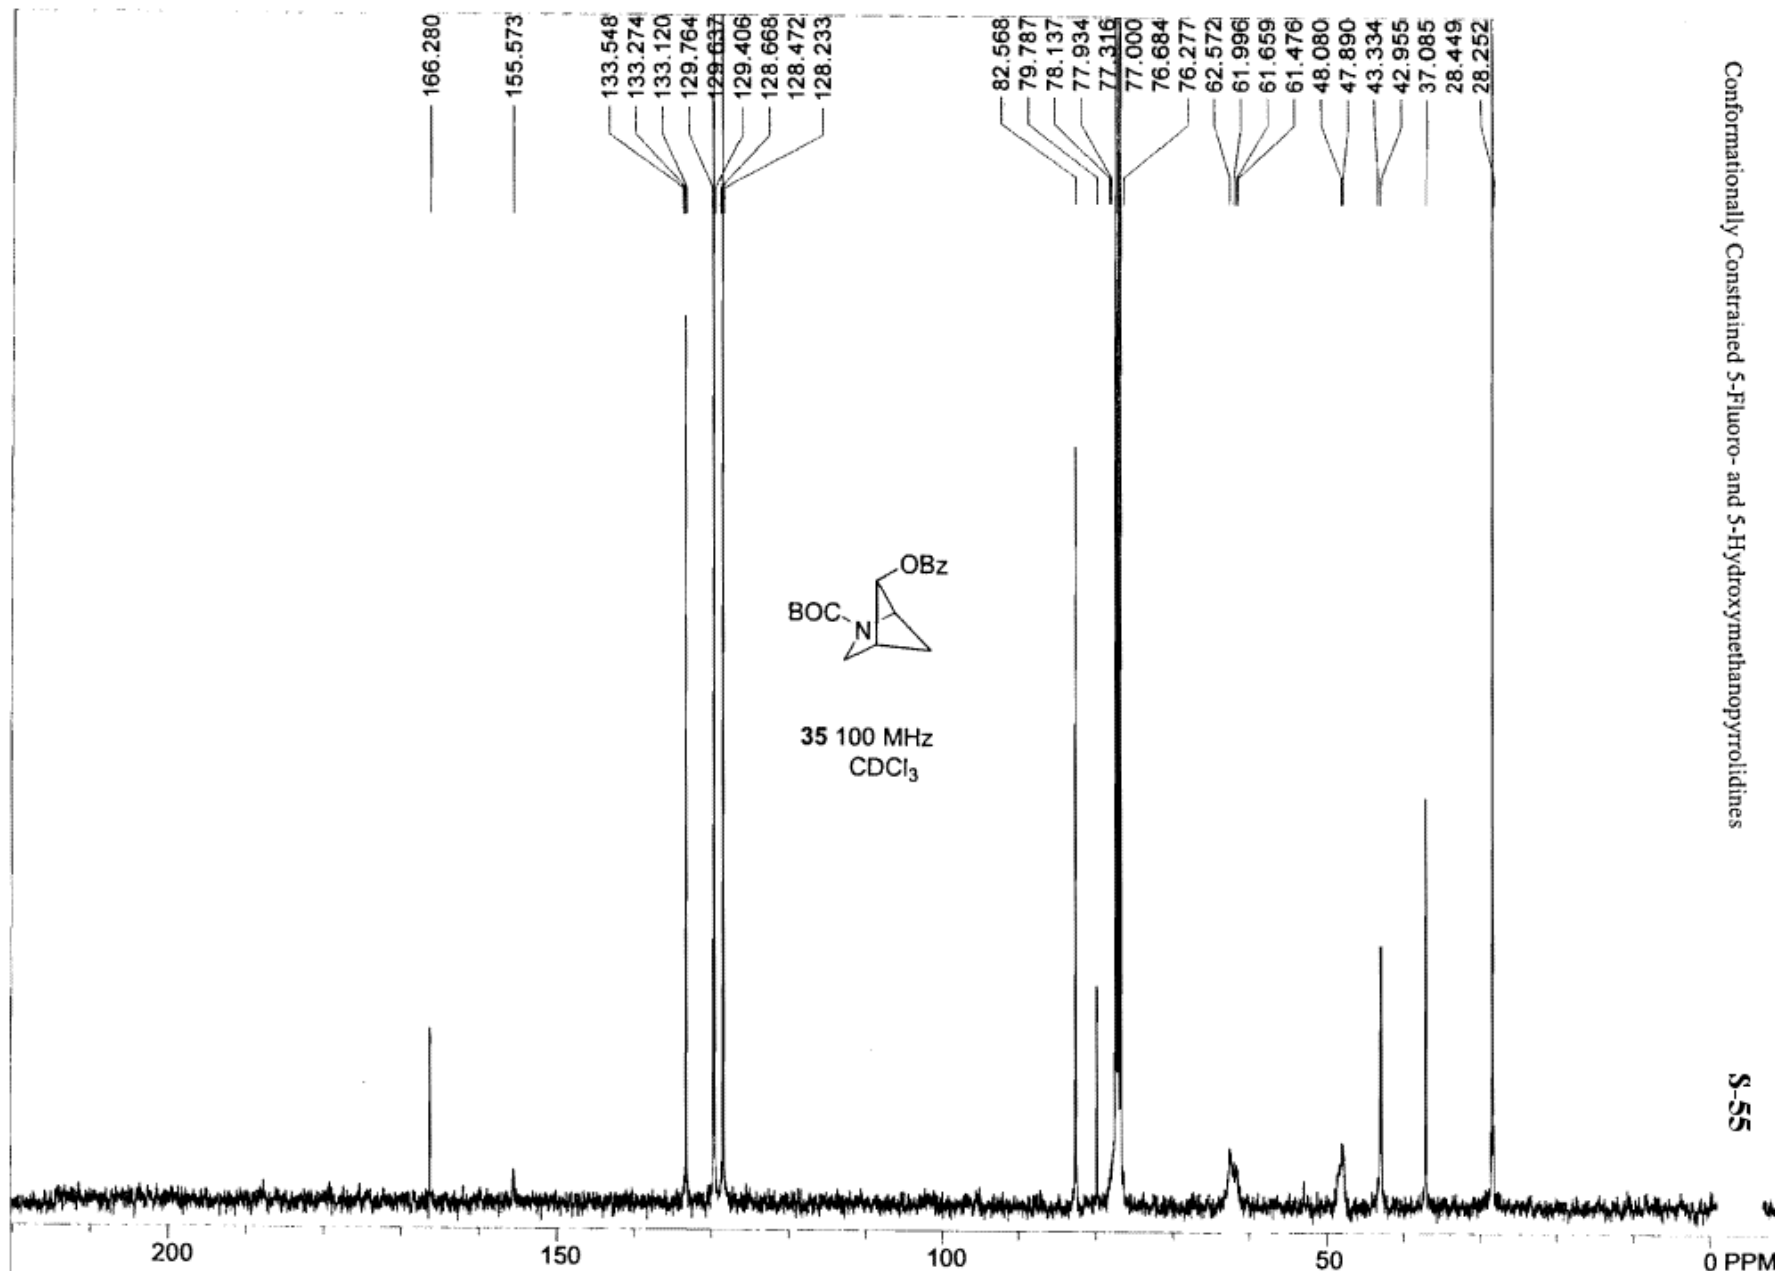

|               |           |                                                             |             |              |         |                                           |  |
|---------------|-----------|-------------------------------------------------------------|-------------|--------------|---------|-------------------------------------------|--|
| carbon2HR.atm |           | USER: temple -- DATE: Nov 3 23:19:54 2007 EST (UT-5h) templ |             |              |         |                                           |  |
| F1: 100.628   | F2: 1.000 | SW1: 23148                                                  |             | OF1: 10583.6 |         | PTS1d: 32768                              |  |
| EX:           |           | PW: 5.7 us                                                  | PD: 2.0 sec | NA: 2048     | LB: 3.0 | Nuts - NBoc[2.1.1] anti-OBz--C---cram-789 |  |

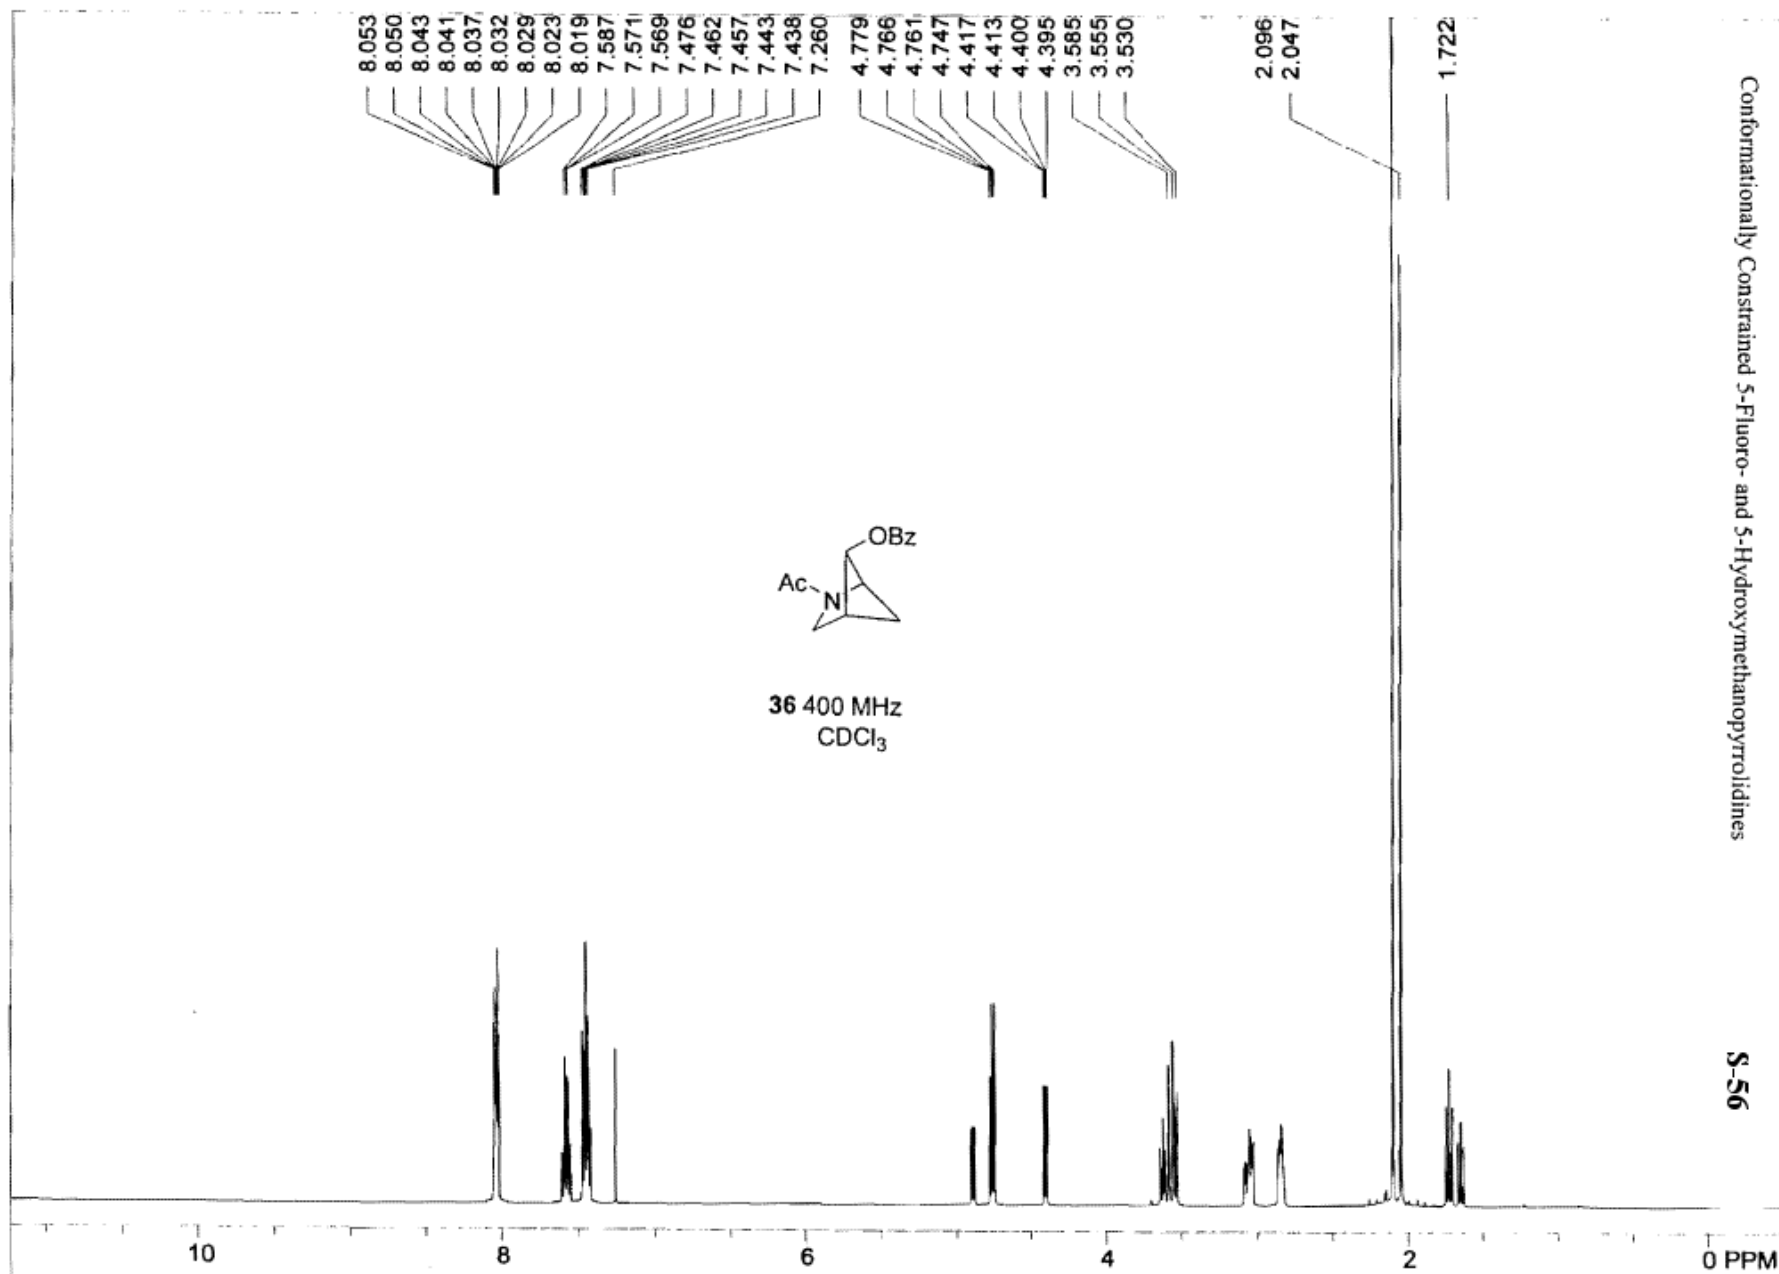

NAc[2.1.1]anti-OBz, proton.atm.

USER: temple -- DATE: Feb 1 23:25:52 2008 EST (UT-5h) templ

F1: 400.130

F2: 1.000

SW1: 8278

OF1: 2004.2

PTS1d: 32768

EX:

PW: 9.8 us

PD: 1.0 sec

NA: 16

LB: 0.1

Nuts - NAc[2.1.1] anti-OBz--H--CDCl3--eram-851



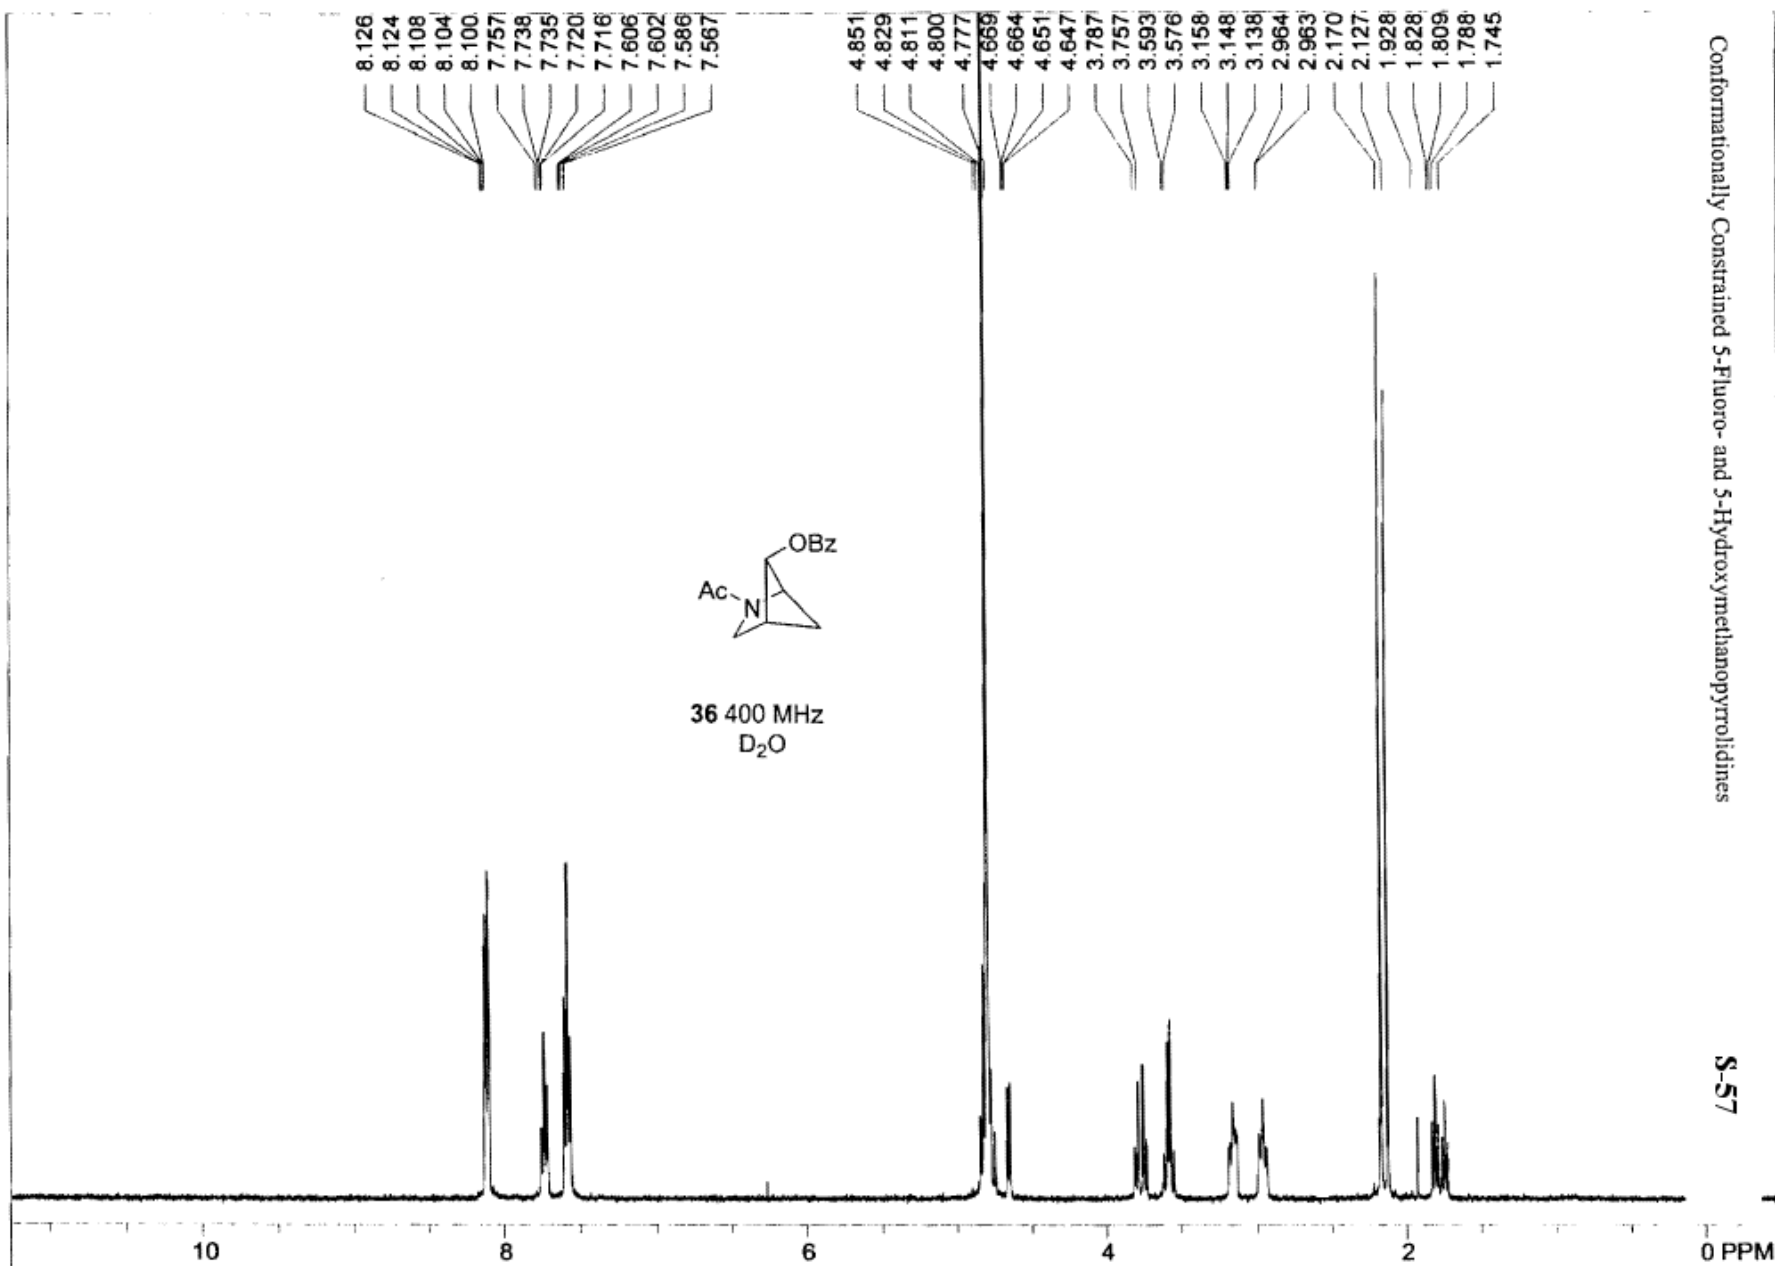

- 8.126
- 4.851
- 8.124
- 4.829
- 8.108
- 4.811
- 8.104
- 4.800
- 8.100
- 4.777
- 7.757
- 4.669
- 7.738
- 4.664
- 7.735
- 4.651
- 7.720
- 4.647
- 7.716
- 3.787
- 7.606
- 3.757
- 7.602
- 3.593
- 7.586
- 3.576
- 7.567
- 3.158
- 2.964
- 3.148
- 2.963
- 3.138
- 2.170
- 2.127
- 1.928
- 1.828
- 1.809
- 1.788
- 1.745

|                                       |           |            |             |                                                              |         |                                              |  |
|---------------------------------------|-----------|------------|-------------|--------------------------------------------------------------|---------|----------------------------------------------|--|
| NAC[2.1.1] anti-OBz, proton10MIN.atm, |           |            |             | USER: temple -- DATE: Jul 16 20:12:15 2008 EDT (UT-4h) temp1 |         |                                              |  |
| F1: 400.130                           | F2: 1.000 | SW1: 8278  |             | OF1: 2040.7                                                  |         | PTS1d: 32768                                 |  |
| EX:                                   |           | PW: 9.8 us | PD: 1.0 sec | NA: 228                                                      | LB: 0.1 | Nuts - NAC[2.1.1] anti-OBz--H--D2O--eram1402 |  |

Conformationally Constrained 5-Fluoro- and 5-Hydroxymethanopyrrolidines

S-58

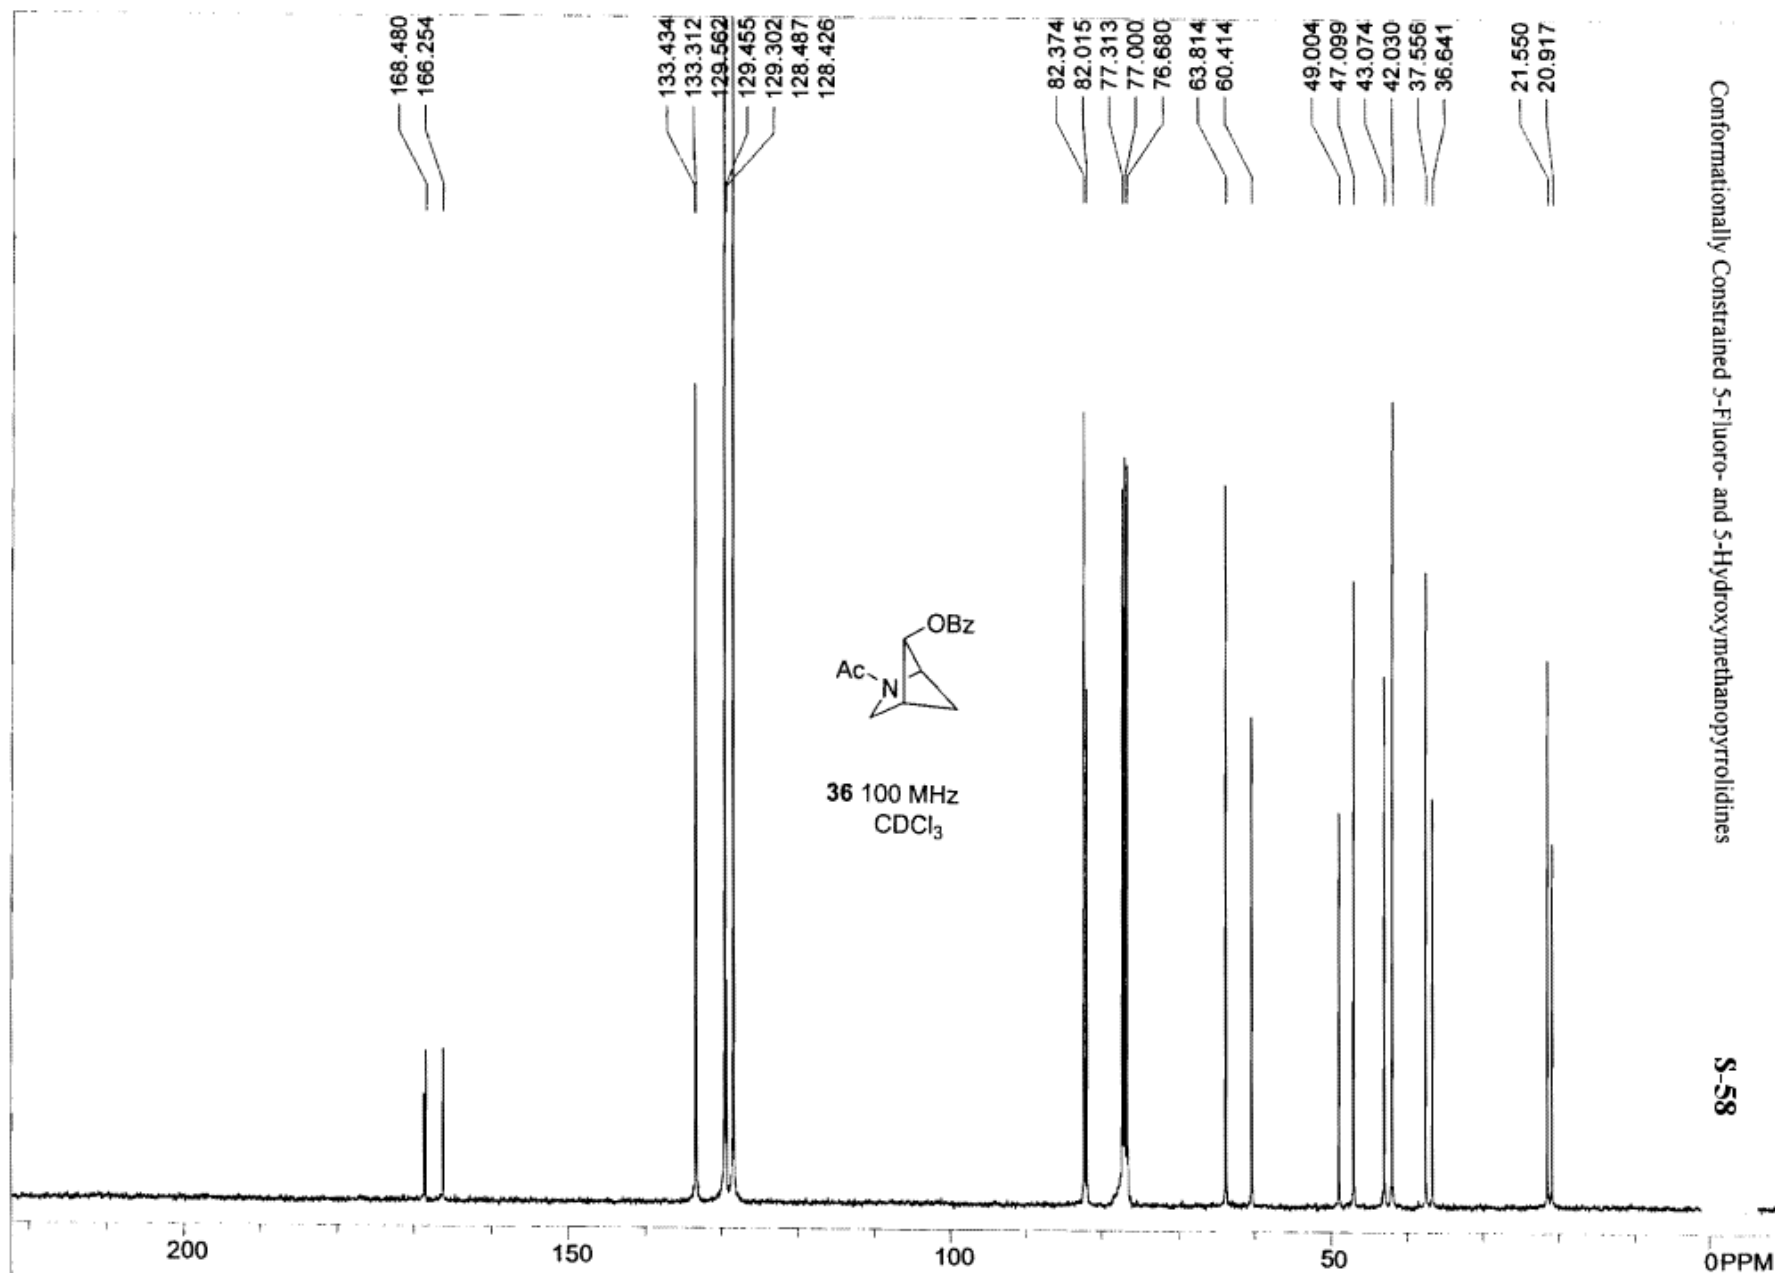

NAc[2.1.1]anti-OBz, carbon2HR, atm.

USER: temple -- DATE: Feb 2 06:25:06 2008 EST (UT-5h) templ

F1: 100.613

F2: 1.000

SW1: 25126

OF1: 10015.0

PTSId: 32768

EX:

PW: 5.7 us

PD: 2.0 sec

NA: 7548

LB: 3.0

Nuts - NAc[2.1.1]anti-OBz--C--CDCl<sub>3</sub>--eram-852

Conformationally Constrained 5-Fluoro- and 5-Hydroxymethanopyrrolidines

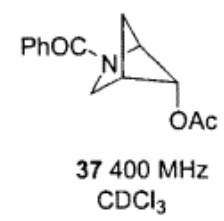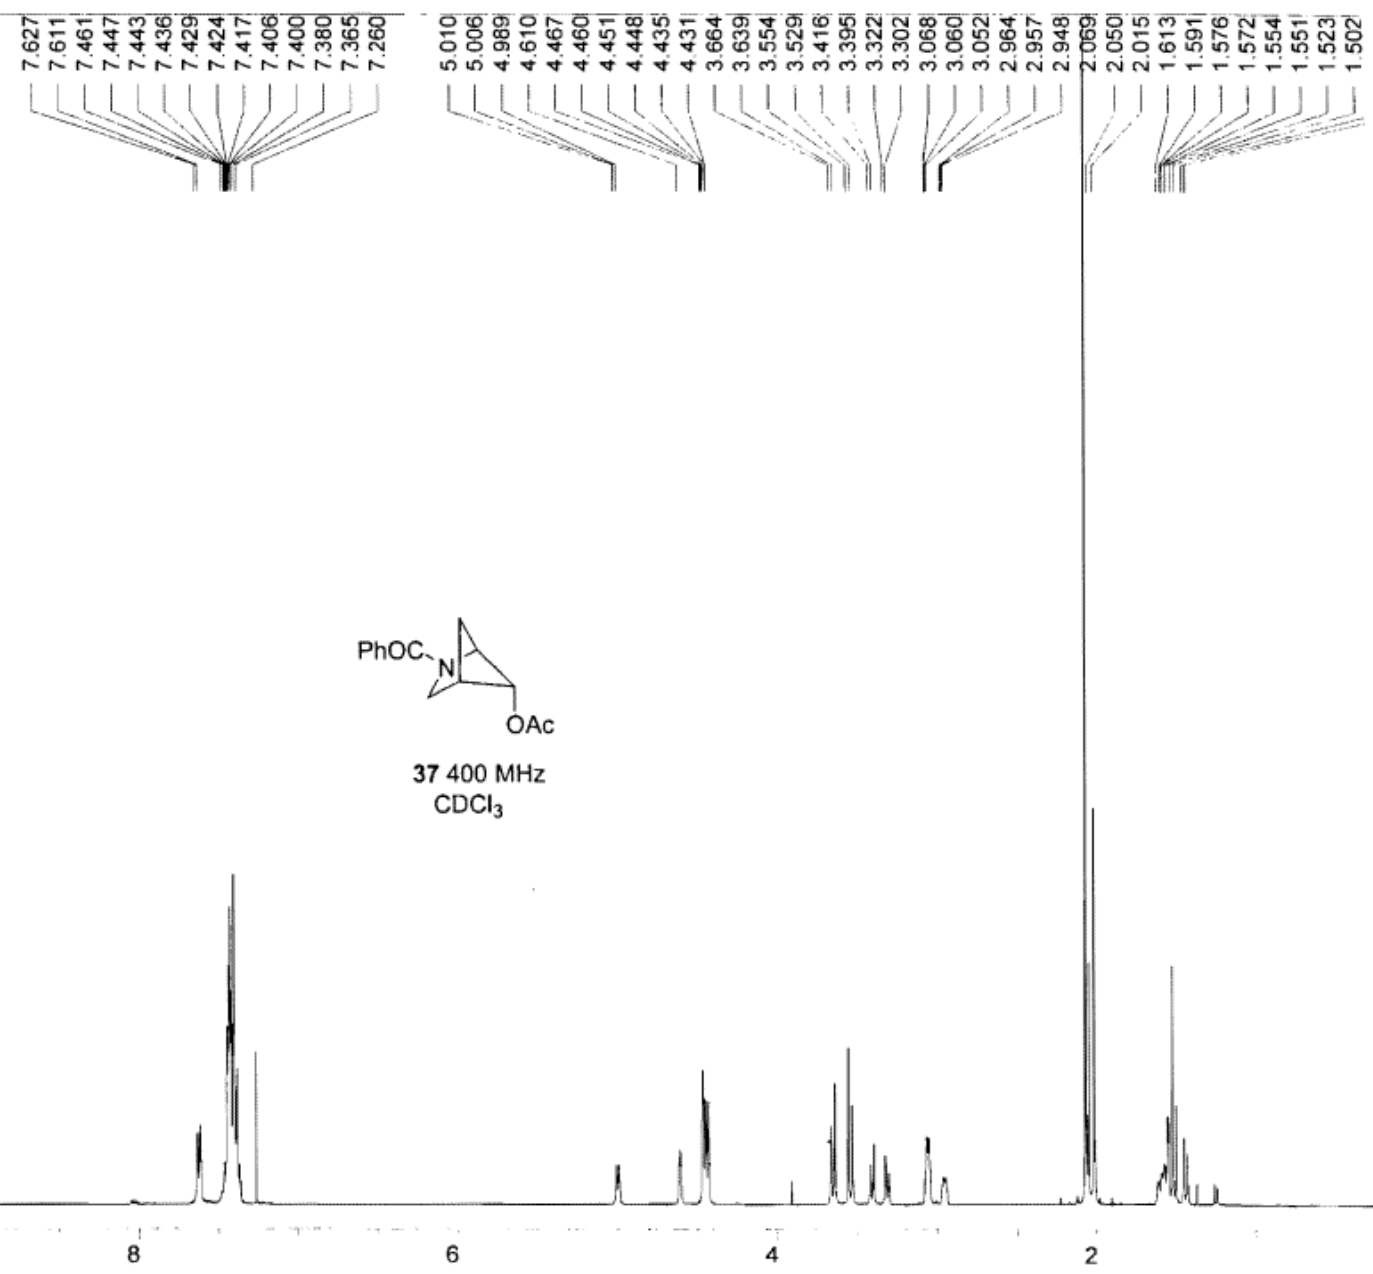

S-59

|                                           |           |              |             |                                                              |         |                                               |  |
|-------------------------------------------|-----------|--------------|-------------|--------------------------------------------------------------|---------|-----------------------------------------------|--|
| syn-OBz acetylation side pdt. proton.atm. |           |              |             | USER: temple -- DATE: Nov 19 22:41:08 2008 EST (UT-5h) templ |         |                                               |  |
| F1: 400.130                               | F2: 1.000 | SW1: 8013    |             | OF1: 2004.8                                                  |         | PTS1d: 32768                                  |  |
| EX:                                       |           | PW: 9.8 usec | PD: 1.0 sec | NA: 16                                                       | LB: 0.1 | WjnNuts - NCOPh[2.1.1] syn-OAc --H--eram-1678 |  |

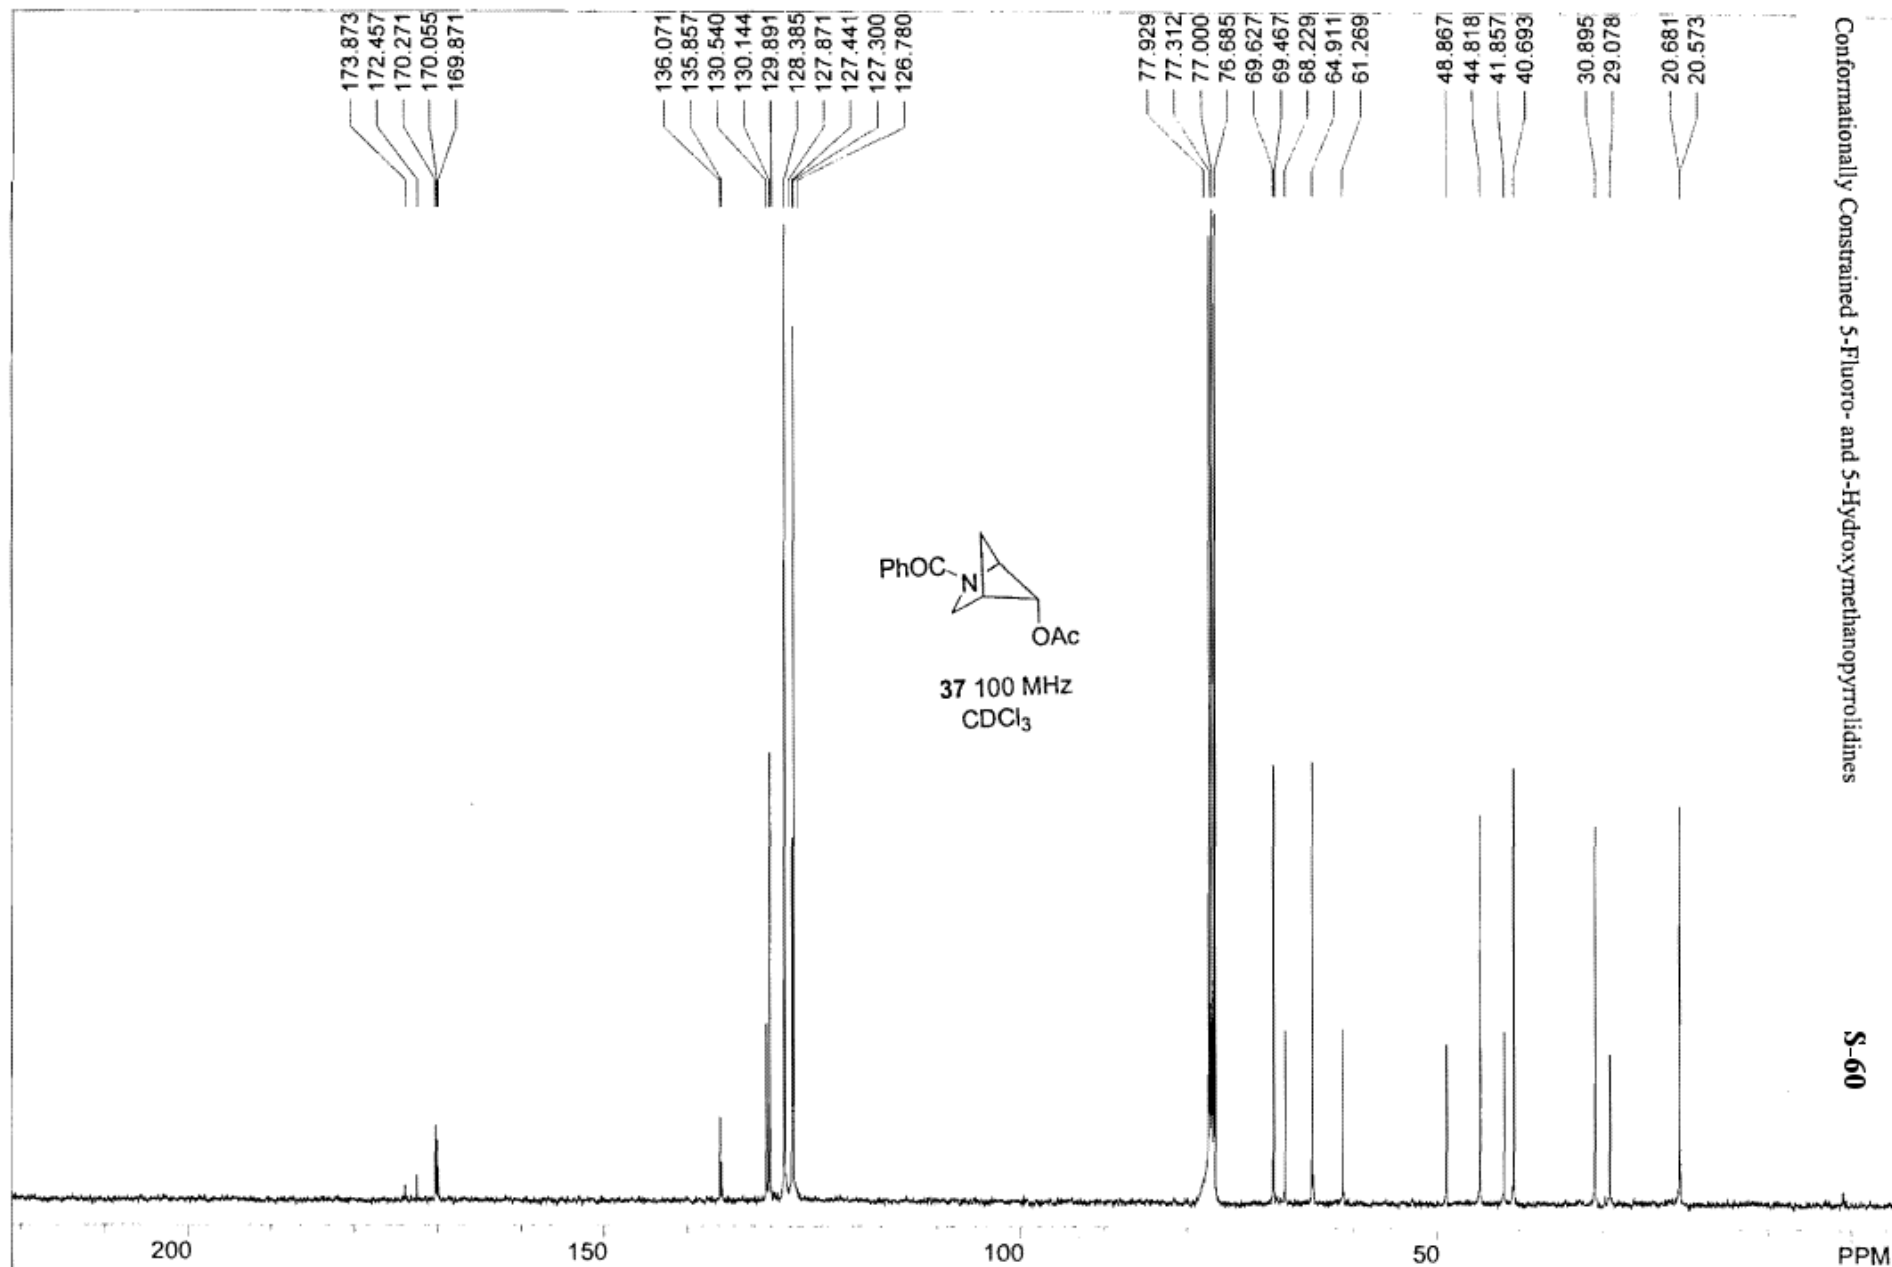

syn-OBz acetylation side pdt\_carbonOVNTE.all

USER: temple -- DATE: Nov 20 06:03:36 2008 EST (UT-5h) templ

F1: 100.613 F2: 1.000

SW1: 25126

OF1: 10020.2

PTS1d: 32768

EX:

PW: 5.7 usec

PD: 2.0 sec

NA: 8000

LB: 3.0

WinNuts - NCOPh[2.1.1] syn-OAc --C--eram-1679
